1 The Molecular Epidemiology and Mechanisms of  
2 Antibiotic Resistance in Gram-positive Bacteria in  
3 Africa: A Systematic Review and Meta-Analysis  
4 from a One Health Perspective  
5

6 John Osei Sekyere<sup>ac#</sup> and Eric Mensah<sup>b</sup>

7 Department of Pharmaceutics, Faculty of Pharmacy and Pharmaceutical Sciences, Kwame

8 Nkrumah University of Science and Technology, Kumasi, Ghana.<sup>a</sup>

9 Kumasi Center for Collaborative Research in Tropical medicine, School of Medical Sciences,

10 Kwame Nkrumah University of Science and Technology, Kumasi, Ghana.<sup>b</sup>

11 Department of Medical Microbiology, School of Medicine, Faculty of Health Sciences,

12 University of Pretoria, Pretoria, South Africa.<sup>c</sup>

13 #Address correspondence to John Osei Sekyere, [jod14139@yahoo.com](mailto:jod14139@yahoo.com)

14  
15 **Running title:** Resistance mechanisms of Gram-positive bacteria

16

17

18

19

20

## **HIGHLIGHTS**

- 21 • There is substantial resistance to antibiotics among Gram-positive bacteria (GPB) in Africa
- 22 • Multidrug-resistant (MDR) *S. aureus*, *E. faecium*, *E. faecalis*, *S. pyogenes*, and *S.*
- 23 *haemolyticus* of the same clones were common in humans, animals and the environment.
- 24 • MDR clones such as *S. aureus* ST5 and *E. faecium* ST80 were found in humans, animals and
- 25 the environment.
- 26 • *mecA*, *ermB*, *ermC*, *tetM/K/L*, and *vanA/B/C* were common in GPB, including in VRSA.
- 27 • Meta-analysis confirmed a high mean rate of drug resistance in GPB from humans (35.68%),
- 28 animals (69.63%) and the environment (88.33%) ( $p$ -value= 0.0301) in Africa.
- 29 • *SCCmec*, *IS16*, and *Tn916* mobilized *mecA*, *ermB* and *tetM* respectively across various GPB
- 30 species in animals, humans, and the environment.
- 31 • A One Health approach to studying resistance mechanisms and molecular epidemiology of
- 32 antibiotic-resistant GPB is warranted.

## 33 **ABSTRACT**

34 The emergence and dissemination of antibiotic resistance (ABR) in bacteria are being driven by  
35 antibiotics use in humans, animals and the environment, threatening global health and  
36 strengthening calls for a One Health approach to contain ABR.

37 A systematic search in PubMed for English research articles reporting on ABR in Gram-positive  
38 bacteria in Africa within the last ten years from 2007 to 2017 was undertaken. This finally yielded  
39 76 articles that were included in this review and all statistical analysis.

40 The same ABR Gram-positive bacterial clones, resistance genes, and mobile genetic elements  
41 (MGEs) were found in humans, animals and the environment. *IS16* and *Tn916* were highly  
42 associated with *erm (B)* and *tet(M)* in *E. faecium* (*ST18*, *ST80* and *ST910*), *S. agalactiae* (*ST612*,  
43 *ST616* and *ST617*), *E. faecalis* and *S. pyogenes* (*emm18*, *emm42*, *emm76* and *emm118*) whilst  
44 *SCCmec* was associated with *mecA* in *S. aureus* (*ST5*, *ST80*, *ST8*, and *ST88*) and *S. haemolyticus*.  
45 The resistance genes, *mecA*, *erm(B)*, *erm(C)*, *tet(M)*, *tet(K)*, *tet(L)*, *van(B)*, *van(A)*, *van(C)*, and  
46 *tet(O)*, were found in isolates from humans, animals and the environment. An ABR rate of 39.55%  
47 in Gram-positive bacteria is estimated in Africa. Meta-analysis reveal that isolates were most  
48 resistant to erythromycin ( $\geq 2\ 482$ ) (37.37%), rifampicin ( $\geq 2\ 323$ ) (33.42%), tetracycline ( $\geq 2\ 181$ )  
49 (40.72%), penicillin ( $\geq 2\ 127$ ) (73.47%), sulfamethoxazole/trimethoprim ( $\geq 1\ 377$ ) (45.97%),  
50 ciprofloxacin ( $\geq 846$ ) (35.37%), gentamicin ( $\geq 805$ ) (23.87%), vancomycin ( $\geq 712$ ) (42.24%),  
51 ampicillin ( $\geq 691$ ) (48.25%), streptomycin ( $\geq 551$ ) (32.03%) and chloramphenicol ( $\geq 376$ ) (11.50%)  
52 (p-value <0.0001).

53 There is substantial resistance to antibiotics among Gram-positive bacteria in clinical and  
54 environmental settings in Africa, mediated by clonal and polyclonal expansion as well as  
55 horizontal transmission of resistance genes. A One Health approach to research, surveillance, and  
56 molecular epidemiology, as well as antibiotic stewardship to contain ABR in humans, animals and  
57 the environment should be prioritised.

58 **Keywords:** *Staphylococcus spp.*; *Enterococcus spp.*; *Streptococcus spp.*; MRSA; VRE

59

60

## 61 1. INTRODUCTION

### 62 *Antibiotic resistance, a threat to public health*

63 The emergence of multiple antibiotic resistance (ABR) determinants in clinically important Gram-  
64 positive bacteria (GPB) such as *Staphylococcus spp.*, *Streptococcus spp.*, and *Enterococcus spp.*  
65 is a major threat to the successful treatment of infectious diseases worldwide as they result in high  
66 morbidity and mortality rates, and limited therapeutic options<sup>1-3</sup>. A recent report projects that the  
67 current rate of 700, 000 deaths/annum caused by drug-resistant pathogens could increase to 10  
68 million by 2050 if unchecked<sup>4</sup>. In the European Union (EU), methicillin-resistant *Staphylococcus*  
69 *aureus* (MRSA) alone affects approximately 150, 000 patients annually within the health-care  
70 sector, resulting in an expenditure of €380 million<sup>5</sup>. Additionally, there were 80, 461 invasive  
71 MRSA infections and 11, 285 MRSA-attributable mortality cases with an estimated annual cost  
72 of \$1.4 billion to \$13.8 billion in the United States of America<sup>6</sup>. In USA, staphylococci and  
73 enterococci together comprise 42% of all pathogens involved in device-associated and procedure-  
74 associated infections<sup>7</sup>. As well, 29–63% of hospital-recorded mortalities have been attributed to  
75 *S. aureus*-mediated bacteremia<sup>8,9</sup>.

76 A significant increase in vancomycin-resistant *Enterococci* (VRE) has been reported in many  
77 countries recently. For instance, vancomycin-resistant *E. faecium* increased from <5% in 2001 to  
78 14.5% in 2013 in Germany<sup>10</sup>. Moreover, of the 9.6% *Enterococcus spp.* isolated from all  
79 nosocomial infections in Europe, 10.2% were VRE<sup>11</sup>. The rate of nosocomial infections due to  
80 VRE is much higher in intensive care units with a significant mortality compared to vancomycin  
81 susceptible *Enterococcus*<sup>11</sup>. According to studies in USA, a hospital cost of between \$ 9,949 and  
82 \$77,558, and \$12,766 was attributed to treating VRE blood stream infections and surgical site

83 infections respectively <sup>12,13</sup>. Puchter et al., (2018) reported a median cost of €13,147 for treating  
84 a single case of nosocomial infections due to VRE <sup>14</sup>.

85 *Streptococcus pyogenes*-associated infections and sequelae pose a devastating burden on public  
86 health and national economies <sup>11</sup>. There are approximately 517,000 deaths annually due to severe  
87 *Streptococcus pyogenes* infections such as rheumatic heart disease, post-streptococcal  
88 glomerulonephritis and acute rheumatic fever globally. A prevalence of 18.1 million cases of  
89 severe Streptococcus-mediated diseases has been estimated, with 1.7 million new cases reported  
90 annually <sup>15</sup>. *S. agalactiae* is capable of causing life-threatening diseases in pregnant women,  
91 newborns and patients with underlying conditions such as diabetes and liver disease <sup>16,17</sup>. Sepsis  
92 due to *S. agalactiae* accounts for about 26% of all neonatal deaths and 10% maternal deaths in  
93 Sub-Saharan Africa<sup>18</sup>. *Bacillus spp.*, such as *Bacillus cereus*, is among the important aetiologies  
94 of foodborne diseases that threaten food security, and is capable of causing serious sequelae such  
95 as neurological disorders, multi-organ damage and abortion <sup>19</sup>.

96 Limited data in Africa makes it impossible to track and monitor the true burden of ABR.  
97 According to a recent WHO report, the potential for ABR to lead to higher mortalities and  
98 morbidities in low- and middle-income countries such as Africa may even be greater as a result of  
99 the higher burden of bacterial infections, limited diagnostic capacity and lower access to second-  
100 line antibiotics <sup>20</sup>.

101 In a recent review, GPB were responsible for a high proportion of infections among children and  
102 showed a high level of resistance to WHO-recommended drugs in Africa <sup>21</sup>. In some African  
103 regions, as many as 80% of *S. aureus* infections are MRSA, which show resistance to most  
104 standard licensed drugs including quinolones and peptides <sup>25</sup>. Although *Enterococcus spp.* are  
105 mostly not as virulent as *S. aureus*, their multidrug resistance (MDR) propensities restrict drug

106 options for clinicians <sup>2</sup>. Patients infected with MRSA are estimated to be 64% more likely to  
107 demise than those infected with MSSA <sup>23</sup>.

### 108 *Sources and anthropogenic activities driving resistance*

109 ABR has been reported in humans, animals and the environment at alarming proportions  
110 worldwide, with indiscriminate antibiotic use being fingered as a major contributor <sup>24-26</sup>.  
111 Resistance genes have been detected in surface water fed with runoff effluents from farms utilizing  
112 antibiotics, hospitals, and sewage processing plants as well as in ground water <sup>27-29</sup>. Furthermore,  
113 genes mediating resistance to last-resort GPB antibiotics such as vancomycin have been recovered  
114 from raw milk and animal products, pigs, wild animals (buffalo, zebra and cattle), waste water,  
115 effluents and patients, implicating veterinary and agricultural use of antibiotics as potential sources  
116 of resistance genes in humans <sup>30-32</sup>. Current reports reveal that global agricultural antibiotics  
117 consumption exceeds that of humans. An estimated 63, 151 tonnes of antibiotics were consumed  
118 globally in livestock production in 2010 <sup>33-35</sup>, and a significant amount of this was used for  
119 veterinary purposes <sup>36,37</sup>. These reports suggest that a larger share of the antibiotics that end up  
120 polluting the environment and communities emanate from livestock production <sup>38-40</sup>. This  
121 interconnectivity between animals, humans and the environment, explains the need to adopt a One  
122 Health research policy.

123 Several studies have reported high rate of MDR among GPB isolates from humans, animals and  
124 the environment in Africa, mainly as a result of overuse, underuse and wrong choice of antibiotics  
125 <sup>41-47</sup>. Different factors have been implicated in the high rate of ABR to the limited drugs in Africa.  
126 These include: unrestricted access to antibiotics over-the-counter without prescription such as  
127 selling on the streets; inadequate hygienic practices; uncontrolled usage of antibiotics as growth  
128 promoters in food animals production; wrong diagnosis and prescription, off-label use and errors

129 in dosage regimens; use of untreated poultry and cattle manure to fertilize agriculture lands;  
130 extensive use of broad-spectrum antibiotics in poultry production; and inefficient chlorination of  
131 hospital wastewater effluents before discharge into the environment <sup>28,41,45,48–52</sup>. Additionally,  
132 inadequate knowledge of animals' diseases, misdiagnosis and poor antibiotic handling practices  
133 in animal production add up to the overall burden of ABR in Africa <sup>40</sup>.

#### 134 ***Molecular ABR mechanisms***

135 Selective pressures exerted by various antibiotics used in human and veterinary medicine, as well  
136 as in agriculture, have resulted in the emergence and dissemination of numerous mechanisms of  
137 resistance in GPB. These mechanisms include drug target-site modification(s), enzymatic  
138 hydrolysis/inactivation of antibiotics, reduced cell wall/membrane permeability and active efflux  
139 <sup>53–56</sup>. Resistance is often acquired through mobile genetic elements (MGEs) such as transposons,  
140 conjugative plasmids, integrons, and insertion sequences, which are capable of mobilizing  
141 resistance genes across a wide spectrum of bacterial species. These include between commensals  
142 and medically important Gram-positive pathogens <sup>57,58</sup>. Tn916 and IS16 are notable MGEs that  
143 carry major ABR determinants and are transmissible between clones of the same or different  
144 bacteria species by a conjugative mechanism. Some MGEs are excised from donor cells and  
145 transferred during cell-to-cell contact prior to being inserted into recipient cells by a site-specific  
146 recombinase. The capability of these MGEs to pick up extra clinically relevant resistance genes  
147 contributes to the emergence of multidrug resistance <sup>59–61</sup>.

#### 148 ***Purpose of this review***

149 Excellent reviews addressing antimicrobial resistance in some GPB in Africa have been published  
150 <sup>21,62–67</sup>. However, reviews discussing the molecular epidemiology and mechanisms of ABR in GPB

151 such as *Staphylococcus spp.*, *Streptococcus spp.* and *Enterococcus spp.* in Africa in the context of  
152 resistance rates, resistance mechanisms (and MGEs), clonality, and geographical distribution are  
153 non-existent, to the best of our knowledge. This review sought to identify species, clones and  
154 MGEs responsible for the spread of resistance genes in GPB in Africa from a One Health  
155 perspective. It is our aim that the geographical distribution of resistant strains and GPB resistance  
156 mechanisms in Africa presented herein will inform the choice of anti-infective agents or treatment  
157 guidelines, infection control strategies and ABR study designs.

### 158 **1.1 Search strategy and inclusion criteria**

159 Research articles published within the last ten years (2007 to January 2018) in English and indexed  
160 in PubMed were searched with the following keywords: “Enterococcus”, and “Streptococcus”,  
161 “Staphylococcus”, in permutations and combinations with “resistance AND Africa”. Studies  
162 which did not identify the underlying ABR mechanisms/genes as well as the clonality of antibiotic-  
163 resistant GPB were excluded. Thus, studies that only reported on antibiotic sensitivity testing  
164 results or undertook ABR surveillance studies without further molecular tests to characterize the  
165 ABR mechanisms and/or clonality of the isolates were excluded. All searches were undertaken  
166 independently by both authors in triplicates to ensure replication of the results.

167 Data extracted from the articles included year of study, country, GPB species, clones, sample  
168 sources, sample size/number of isolates, number of resistant isolates, resistance genes and MGEs  
169 such as integrons, plasmids, transposons and insertion sequences, and antibiotics to which the  
170 strains were resistant (Tables 1-5). The mean rate of ABR among GPB per country and in Africa  
171 was determined to identify countries with the highest or lowest levels of resistance in Africa. As  
172 well, the antibiotics to which the isolates were most resistant were determined to evaluate their  
173 correlation with the detected/reported resistance mechanisms.



174 The resistance mechanisms, as well as MGEs involved in the transmission of resistance genes per  
175 species or clone, were determined to assess the means of resistance transfer i.e., horizontal or  
176 vertical (through clonal expansion), per specimen sources (animal, human, and environment). The  
177 distribution of clones, resistance genes, and MGEs were considered to identify countries with most  
178 resistant clones, resistance genes, and their associated MGEs.

## 179 **1.2 Statistical analysis.**

180 The data was analyzed using Microsoft Excel® 2017 and Graph pad prism™ 6 (GraphPad  
181 Software, San Diego, CA, USA) (Supplementary data). Calculation for the statistical significance  
182 of the data was determined using the kolmogorov-smirnov test (with Dallal - wilkinson-Lilliefors  
183 p-value) and/or column statistics or one sample t-test, and the confidence intervals determined at  
184 95%. The p-values were two tailed with a Gaussian approximation. A p-value of <0.05 was  
185 considered as statistically significant. Only studies that provided the required information were  
186 used in the analysis. In all, 76 articles were used for the data analysis.

## 187 **2. RESULTS AND DISCUSSION**

188 Antibiotic usage in humans, food, wild and domestic animals, as well as in agriculture, is selecting  
189 for ABR genes and resistant bacteria in hospitals, farms, and the environment<sup>33–35,38–40,53</sup>. The  
190 constant interactions between man, animals, food and the environment enhances the easy  
191 transmission of resistance genes and resistant bacteria between humans, animals and the  
192 environment<sup>73,74</sup>. Thus, ABR is not limited to clinical settings, farms, the environment or to  
193 individual countries as increased globalization, trade and international travel put all humans and  
194 animals at risk of contracting difficult-to-treat antibiotic-resistant infections<sup>75,76</sup>. This limitless  
195 capability for resistance genes and resistant bacteria to spread across a broad-spectrum of hosts or

196 niches makes the menace even more worrying, underscoring the need for a One Health approach  
197 to contain the situation by looking at resistance from all spheres: humans, animals and the  
198 environment<sup>77,78</sup>.

199 A meta-analysis of published literature confirmed the presence of a high mean rate of drug  
200 resistance in GPB from humans (35.68%), animals (69.63%) and the environment (88.33%) (*p*-  
201 value= 0.0301) in Africa, albeit many studies that did not address the molecular mechanisms of  
202 resistance in GPB were excluded. Obviously, the mean rate of resistance would have been higher  
203 had all research articles using only phenotypic methods to describe ABR in GPB been included.  
204 Interestingly, although a lesser number of GPB were isolated from environmental sources, they  
205 expressed higher ABR than those from humans and animals; hence, the higher mean resistance  
206 rate of 88.33%. This also underscores the fact that there is increasing ABR genes in the  
207 environment, obviously due to antibiotic pollution from human activity. Evidently, ABR is high  
208 among GPB in certain regions in Africa (Figure 3) and underpins the need to up the ante against  
209 this menace through increased molecular surveillance research, education of clinical  
210 microbiologists on ABR, and antibiotic stewardship.

211 Studies describing detailed molecular mechanisms of GPB resistance and molecular epidemiology  
212 in Africa are few, making it difficult to paint a vivid comprehensive picture of ABR in Africa.  
213 However, this review shows that *S. aureus* ST5, *E. faecium* ST18, ST80 and ST910, *E. faecalis*, *S.*  
214 *pneumoniae* and *S. agalactiae* harbouring *mecA*, *tet* and *erm* genes, were commonly found in  
215 humans, animals and the environment, particularly in Northern, Western, and Southern Africa.  
216 Thus, careful use of  $\beta$ -lactams, tetracyclines, and macrolides is warranted to prevent further  
217 selection and dissemination of these resistance genes and resistant clones. Furthermore, it will be

218 prudent for countries within these regions to review their recommended antibiotic regimens,  
219 guidelines/protocols for infections caused by these species.

220 *Erm(B)*, *tet(M)* and *vanA* genes were mobilized by *Tn916* and *IS16*. Moreover, *erm(B)* and  
221 *tet(M)* were found in *S. aureus*, *Enterococcus spp.* and *Streptococcus spp.*, indicating horizontal  
222 transfer within same clones, different clones and species. The discovery of same clones and  
223 resistance genes in specimens from humans, animals and the environment suggest a possible  
224 transmission of these clones between humans, animals and the environment, corroborating the  
225 need for a One Health approach to infection control and management of antibiotic-resistant  
226 infections. Further molecular epidemiological surveillance in the above-mentioned states is  
227 crucial to forestall further spread of these resistant pathogenic clones both within their borders  
228 and from their borders to other countries.

## 229 **2.1 Resistance rates per countries and MDR GPB species**

230 Of the 1,466 articles returned from the systematic literature search (Fig. 1), 76 studies  
231 representing 20 out of 54 African countries were included in this review and data analysis.  
232 Tunisia (n= 19) recorded the highest number of studies followed by South Africa (n=1, 4), Egypt  
233 (n=9), Nigeria (n=7) and Algeria (n=4) (*p*-value 0.0054). Majority of the included studies were  
234 undertaken in Northern Africa (n=32, 43.83%), Southern Africa (n=16, 21.92%) and Western  
235 Africa (n=10, 12.99%). Different rates of resistance to antibiotics were reported in different  
236 countries in Africa (Tables 2-4). High mean resistance rates were reported in Nigeria, Tunisia,  
237 Algeria, and South Africa. Cross-contamination of multi-drug resistant bacteria between patients  
238 and the environment accounted for the high rate of resistance in Algeria<sup>79,101,108–110</sup>. The high  
239 rate of ABR in Tunisia was attributed to cross contamination between hospital patients and  
240 hospital environment, immune deficiency<sup>111</sup>, over-consumption of antibiotics, heavy

241 consumption of sheep meat, which is a reservoir of MRSA, and high consumptions of antibiotics  
242 in animal feed. In Egypt, inappropriate antibiotic prescription practices<sup>52</sup>, inadequate hygienic  
243 handling and processing of food<sup>30</sup>, and close contact with pet dogs accounted for the high  
244 resistance<sup>112</sup>.

245 The high rate of drug resistance in Nigeria has been attributed to the exchange of resistance  
246 genes between farm animals or their products and man<sup>113,114</sup>, existence of MRSA in clinical and  
247 community settings<sup>115</sup>, uncontrolled usage of antibiotics<sup>116</sup> and the presence of efflux pumps in  
248 coagulase-negative staphylococcus strains<sup>117</sup>. Expansion of resistant clones<sup>80</sup>, variability of  
249 hospital acquired MRSA clones<sup>103</sup>, consumption of unpasteurized milk or inefficient thermal  
250 processing of milk<sup>44</sup>, shedding of resistant clones from animals to the environment and heavy  
251 consumption of antibiotics to treat TB due to high HIV burden<sup>118</sup>, were incriminated for the  
252 high-level resistance in South Africa.

253 *Staphylococcus spp.* (*S. aureus*, *S. haemolyticus* and *S. saprophyticus*); *Streptococcus spp.* (*S.*  
254 *pyogenes* and *S. agalactiae*), and *Enterococcus spp.* (*E. faecium*, *E. faecalis*, *E. hirae*, *E. durans*,  
255 *E. gallinarum*) were the antibiotic-resistant GPB widely distributed in Northern, Southern,  
256 Western and Central Africa. The high number of *tet(M/L/K)*, *erm(A/B/C)*, *aph(3')-III* and  
257 *van(A/B/C)* in *Staphylococcus spp.*, *Enterococcus spp.*, and *Streptococcus spp.* reported in Tunisia,  
258 South Africa, Nigeria, Algeria and Egypt accounted for the high rate of resistance to tetracycline  
259 (43.76%, 95% CI=34.37-52.36)(p-value=0.0001), erythromycin (42.05%, 95% CI=33.16-  
260 50.94)(p-value = .0001), kanamycin (34.99%, 95% CI=18.34-51.65%) and vancomycin (42.24%,  
261 95% CI=19.71-64.76) (p-value = .0001). Such resistant GPB are known to compromise the safety  
262 of invasive medical procedures such as organ transplants, orthopedic surgery, and cancer  
263 treatment. In addition, infections such as sepsis, endocarditis, deep wound infections, pneumonia,

264 meningitis and urinary tract infections caused by these resistant pathogens are becoming  
265 increasingly fatal due to limited treatment options <sup>4,99</sup>. The abuse of antibiotics as growth  
266 promoters, prophylaxis, and metaphylaxis in food animals in these countries have been implicated  
267 in the selection of resistant bacteria that can pass on to humans through food consumption, direct  
268 contact with animals and the environment, as well as trade of animals and food products between  
269 countries <sup>100</sup>.

270 Approximately 26,108 GPB were isolated from humans (n=47 studies, 64.38%), animals (n=16  
271 studies, 21.92%) and the environment (n=10 studies, 13.70%), of which 10,326 were resistant,  
272 equivalent to 39.55% overall resistance rate in Africa (Tables 1-4). Countries such as Algeria,  
273 Egypt, Ghana, Nigeria, Uganda, Tunisia recorded at least 51% mean rates of ABR (Tables 2-4).  
274 Nigeria recorded the highest mean rates of resistant isolates (n=74.62%) followed by Egypt  
275 (n=71.79%), Ghana (n=70.41%), Tunisia (n=66.55%), Algeria (n=57.40%), Angola (n=56.77%),  
276 Uganda (n=51.43%), Democratic Republic of Congo (49.45%), Kenya (n=37.3%), Tanzania  
277 (n=35.75%), São Tomé & Príncipe (n=34.85%), and South Africa (n=31.50%). Resistant isolates  
278 were reported in Angola (17.29%), Gabon (49.06%), Libya (33.69%), Morocco (83.33%),  
279 Mozambique (19.15%), Namibia (29.31%), and Senegal (100%) in single studies (Tables 1-3).

280 The antibiotics to which the isolates were most resistant to were erythromycin ( $\geq 2$  482) (37.37%),  
281 rifampicin ( $\geq 2$  323) (33.42%), tetracycline ( $\geq 2$  181) (40.72%), penicillin ( $\geq 2$  127) (73.47%),  
282 sulfamethoxazole/trimethoprim ( $\geq 1$  377) (45.97%), ciprofloxacin ( $\geq 846$ ) (35.37%), gentamicin  
283 ( $\geq 805$ ) (23.87%), vancomycin ( $\geq 712$ ) (42.24%), ampicillin ( $\geq 691$ ) (48.25%), streptomycin ( $\geq 551$ )  
284 (32.03%) and chloramphenicol ( $\geq 376$ ) (11.50%) (p-value <0.0001) (Tables 2-4). Countries with  
285 high number of studies such as Tunisia, South Africa, Egypt and Nigeria recorded high number of  
286 ABR. These countries recorded high number of *mecA*, *erm(B)*, *tet(M)*, *drfG* and *vanB* resistance

287 genes. Vancomycin resistance was reported in six studies in both animals and the environment,  
288 and five studies in Humans. Vancomycin-resistant *Enterococcus spp.* ( $\geq 594$  isolates) and  
289 vancomycin-resistant *Staphylococcus spp.* ( $\geq 118$  isolates) were reported in humans, animals and  
290 the environment. Vancomycin-resistant *Staphylococcus aureus* (VRSA) was reported in animals  
291 ( $\geq 47$  isolates), the environment ( $\geq 15$  isolates) and humans ( $\geq 2$  isolates); whilst vancomycin-  
292 resistant *E. faecium* was reported in the environment ( $n \geq 238$  isolates), animals ( $\geq 330$  isolates) and  
293 humans ( $\geq 20$  isolates).

294 *S. aureus* ( $\geq 24\ 321$  isolates in 47 studies) accounted for approximately 92.55% of all GPB  
295 involved in hospital- and community-acquired infections, followed by *E. faecium* ( $\geq 1\ 121$  isolates  
296 in 18 studies, 4.27%), *S. agalactiae* ( $\geq 750$  in 6 studies, 2.85%) *E. faecalis* ( $\geq 284$  isolates in 13  
297 studies, 1.08%). Antibiotic-resistant *S. aureus* (ST5), *E. faecium* (ST18, ST80 and ST910) and *E.*  
298 *faecalis* harbouring *mecA*, *erm(B)*, *erm(C)*, *tet(M)*, *tet(K)*, *tet(L)* and *van(B)* were isolated from  
299 humans, animals and the environment, albeit in higher proportion in humans and animals than the  
300 environment (Tables 1-2). For instance, Farhat et al. (2014)<sup>79</sup>, van Rensburg et al. (2012)<sup>80</sup> and  
301 De Boeck et al. (2015)<sup>81</sup> in Algeria, South Africa and Democratic Republic of Congo respectively,  
302 reported on resistant *S. aureus* ST5 in humans whilst Fall et al. (2012)<sup>82</sup> reported on the same  
303 clone (*S. aureus* ST5) in pigs from Senegal. Further, Mariem et al. (2013)<sup>47</sup> isolated the same  
304 clone (*S. aureus* ST5) from the environment in Tunisia, suggesting that this clone is widely  
305 distributed in Africa in humans, animals and environment. It is currently not clear whether this  
306 clone first emerged from humans, animals or the environment, but its presence in all three spheres  
307 shows the possibility of resistant species and clones being disseminated between animals, humans  
308 and the environment. Notably, *S. aureus* ST5 is among the frequently reported clones in Asia<sup>83</sup>

309 and recent evidence suggest that it has spread from hospitals into communities, resulting in  
310 community-acquired MRSA <sup>84</sup>.

311 Similarly, Lochan et al. (2016) <sup>85</sup> in South Africa, Dziri et al. (2016) <sup>43</sup> and Elhani et al. (2014) <sup>71</sup>  
312 in Tunisia isolated resistant *E. faecium* ST80 from humans. For the first time, *E. faecium* ST80  
313 was isolated from environmental samples in a hospital in Tunisia by Elhani et al. (2013) <sup>71</sup> and  
314 Dziri et al. (2016) <sup>72</sup>. Transmission of this resistant clone to animals is possible, although not yet  
315 reported. This implies that these resistant species and clones are circulating between humans,  
316 animals and the environment, underpinning the broad host range and transmissibility of these  
317 strains between animals, humans and the environment.

318 Although *mecA* was the predominant resistance gene, higher resistance was recorded to  
319 erythromycin probably due to lesser use of penicillin(s) in antibiotic susceptibility testing or lesser  
320 inclusion of *erm* primers in PCR analysis to detect resistance genes.

321 MRSA strains were the most commonly isolated strains ( $\geq 2,350$ ) <sup>86-89</sup>. This is consistent with the  
322 global report of increasing prevalence of MRSA <sup>90,91</sup>. MRSA harbours the *mecA* gene, which is  
323 carried by the *SCCmec* MGE, and mediates resistance to multiple antibiotics <sup>92</sup>. From this review,  
324 MRSA showed resistance to eleven different antibiotic classes: aminoglycosides (gentamicin,  
325 tobramycin),  $\beta$ -lactams (penicillin, ampicillin, oxacillin, cefoxitin), fluoroquinolones  
326 (ciprofloxacin, levofloxacin, ofloxacin), glycopeptides (vancomycin), lincosamide (clindamycin),  
327 macrolides (erythromycin), phenicols (chloramphenicol), rifamycins (rifampicin), streptogramins  
328 (pristinamycin), sulfonamides (trimethoprim/sulfamethoxazole), and tetracyclines (tetracycline).  
329 MRSA is thus a worrying public health threat as some strains have evolved resistance to almost  
330 all licensed drugs (26).

331 Vancomycin-resistant Enterococci (VREs) ( $\geq 594$ ), which were reported in Northern and South  
332 Africa, also pose a serious threat to public health as they are resistant to vancomycin, a  
333 glycopeptide that is reserved for fatal or life-threatening Gram-positive infections, and other  
334 important antibiotics such as ampicillin, erythromycin, fluoroquinolones (ciprofloxacin,  
335 levofloxacin), gentamicin, rifampicin, streptomycin, trimethoprim/sulfamethoxazole and  
336 tetracycline. In this study, enterococcus isolates had a resistance rate of 52.13% (95% CI=21.75 -  
337 82.51) (p-value = 0.0006) to vancomycin. Multidrug resistance in VREs increases VRE-associated  
338 mortality rates, which is likely to increase to 75% compared with 45% from susceptible strains  
339 <sup>31,95</sup>. As well, evolution of macrolide resistance (45.96%, 95% CI=0.04 – 91.88) (p-value = 0.049)  
340 in drug-resistant streptococci is limiting treatment options and resulting in high mortalities <sup>69,96,97</sup>.  
341 In this study, MRSA, VRE and drug-resistant streptococci remain major public health threats,  
342 calling for measures to contain ABR. Novel antibiotics such as linezolid, synercid, and daptomycin  
343 should be used empirically in such infections whilst awaiting susceptibility results. The empirical  
344 therapy can be changed or maintained based on the susceptibility report <sup>98</sup>.

## 345 **2.2 Resistance rates of species per animals, humans and the environment**

346 The rates of ABR in isolates recovered from the environment was highest, followed by isolates  
347 from animal source. Among environmental isolates, 94.30% (95% CI=83.49–105.1)(p-value =  
348 0.0001) were resistant to penicillin, 81.99% (95% CI=40.57–123.4)(p-value 0.0082) were resistant  
349 to sulfamethoxazole/trimethoprim, 75.53% (95% CI=1.92–149.1)(p-value = 0.0480) were  
350 resistant to ampicillin, 68.30% (95% CI=23.12–104.5) (p-value = 0.0063) were resistant to  
351 ciprofloxacin, 62.78% (95% CI=-56.96–105.5)(p-value = 0.153) were resistant to clindamycin,  
352 60.93% (95% CI=39.70–82.17)(p-value = 0.0002) were resistant to erythromycin, and 59.37%  
353 (95% CI=15.10–103.6)(p-value = 0.0183) were resistant to vancomycin.



354 Among animal isolates, 58.80% (95% CI=17.87–100)(p-value = 0.0148) were resistant to  
355 penicillin, 49.24% (95% CI=13.76–84.71)(p-value = 0.016) were resistant to clindamycin, 46.22%  
356 (95% CI=26.77–65.67)(p-value = 0.0017) were resistant to ciprofloxacin, 44.91% (95%  
357 CI=17.31–60.82) (p-value = 0.046) were resistant to ampicillin, 39.24% (95% CI=14.53–63.96)(p-  
358 value = 0.0081) were resistant to trimethoprim/sulfamethoxazole, 36.35% (95% CI=20–52.67)(p-  
359 value = 0.0005) were resistant to erythromycin, and 25.84% (95% CI=13.94–64.99)(p-value =  
360 0.15) were vancomycin resistant.

361 The rates of resistance were much lower in humans for most of the antibiotics used. Among the  
362 various species, *Enterococcus spp.* and *Staphylococcus spp.* recorded high rates of resistance for  
363 most antibiotics. *Streptococcus spp.* reported low rates of resistance except for tetracycline that  
364 recorded a high rate of 57.60% (95% CI=25.18–90.03) (p-value = 0.065). Resistance to  
365 vancomycin was not reported in any *Streptococcus spp.* isolates.

366 *Enterococcus spp.*, mainly *E. faecium* and *E. faecalis*, recorded a resistance rate of 99.38% (95%  
367 CI=91.43–107.3)(p-value = 0.004) to clindamycin, 82.26% (95% CI=43.37–121.1)(p-value =  
368 0.0042) to trimethoprim/sulfamethoxazole, 61.39% (95% CI=44.22–78.55)(p-value = 0.0001) to  
369 erythromycin, 55.59% (95% CI=22.98–88.20)(p-value = 0.0035) to vancomycin, 54.39% (95%  
370 CI=29.17–70.52)(p-value = 0.047) to ciprofloxacin, 50.75% (95% CI=30.96–70.54)(p-value =  
371 0.0002) to tetracycline, 47.09% (95% CI=23.65–70.52)(p-value = 0.0017) to ampicillin, 42.52%  
372 (95% CI=14.47–70.57)(p-value = 0.0089) to kanamycin, 30.93% (95% CI=10.91–50.95)(p-value  
373 = 0.007) to streptomycin and 30.07% (95% CI=18.20–41.96)(p-value = 0.0001) to gentamicin.

374 *S. aureus* showed high resistance (71.33%) to penicillin (95% CI=50.43–92.22)(p-value = 0.0001),  
375 55.36% to ampicillin (95% CI=15.77–94.22)(p-value = 0.0156), 47.34% to streptomycin (95%

376 CI=60.24–154.9)(p-value = 0.20), 37.63% to tetracycline (95% CI=26.14–49.11)(p-value =  
377 0.0001), 31.38% to trimethoprim/sulfamethoxazole (95% CI=18.01–44.76)(p-value = 0.0001),  
378 30.37% to ciprofloxacin (95% CI=18.38–42.37)(p-value = 0.0001), 29.71% to rifampicin (95%  
379 CI=8.78–50.63)(p-value = 0.010), 27.74% to erythromycin (95% CI=17.67–37.80)(p-value =  
380 0.0001), 25.37% to clindamycin (95% CI=12.33–38.41)(p-value = 0.128), 22.57% to gentamicin  
381 (95% CI=5.97–51.11)(p-value = 0.0003) and 18.97% to vancomycin (95% CI=5.34–43.27)(p-  
382 value = 0.096).

### 383 **2.3 Resistance mechanisms, clones, and MGEs**

384 Few studies identified the clones and MGEs in the resistant isolates. Of the 76 included studies,  
385 32 identified the clones whilst 22 described the MGEs, which was used in the statistical analysis.  
386 The most dominant gene detected in Africa, which was widespread and responsible for resistance  
387 in GPB, was *mecA* ( $\geq 603$ ), followed by *erm(B)* ( $\geq 984$ ), *tet(M)* ( $\geq 620$ ), *dfrG* ( $\geq 400$ ), *vanB* ( $\geq 380$ )  
388 *blaZ* ( $\geq 362$ ), *aph(3')-IIIa* ( $\geq 139$ ) and *mefA/E* ( $\geq 47$ ) (p-value = 0.0011) (Fig. 2a). Isolates from  
389 humans had the highest *mecA* ( $\geq 2079$ ), *ermB* ( $\geq 721$ ) and *tet(M)* ( $\geq 461$ ) (p-value = 0.048)  
390 resistance genes. This was followed by animals (*mecA*  $\geq 208$ ), *erm(B)* ( $\geq 362$ ) and *tet(M)* ( $\geq 78$ ) (p-  
391 value = 0.343). (Tables 1-4). The 21 studies that described the MGEs included 15 *SCCmec* ( $\geq 2$   
392 138), two *IS16* ( $\geq 18$ ) and two *Tn916* ( $\geq 99$ ) (Table 1).

393 Figure 2b represents MGEs per clone. *S. aureus* clones ST5, ST8, ST 80 and ST88 were highly  
394 associated with *mecA*. Resistant *S. aureus*, *E. faecium* and *E. faecalis* clones such as *S. aureus* ST5,  
395 and *E. faecium* clones ST18, ST80, and ST16 were widely distributed in humans, animals and the  
396 environment. Similarly, *mecA*, *erm(B)*, *erm(C)*, *tet(M)*, *tet(K)*, *tet(L)*, *van(B)*, *van(A)*, *van(C)* and  
397 *tet(O)* were reported in isolates from humans, animals and the environment (Table 1).

398 *IS16* and *Tn916* were found with the resistance genes *erm (B)* and *tet(M)* in *E. faecium* (*ST18*,  
399 *ST80* and *ST910*), *S. agalactiae* (*ST612*, *ST616* and *ST617*), *E. faecalis* and *S. pyogenes* (*emm18*,  
400 *emm42*, *emm76* and *emm118*) isolated from humans, animals and the environment (Tables 2-4).  
401 *TetM* was associated with *Tn916* transposon in tetracycline-resistant *S. agalactiae* <sup>68</sup> and *S.*  
402 *pyogenes* <sup>69</sup> in humans in Tunisia. Fischer et al. (2013) also reported the association between *Tn916*  
403 and *tetM* in tetracycline resistance *S. agalactiae* in camel in Kenya <sup>70</sup>. Similarly, *IS16* element was  
404 found in vancomycin-resistant *E. faecium* (*ST80*, *ST180* and *ST910*) in humans and the environment  
405 in Tunisia <sup>71,72</sup>. Investigations into the association between MGEs and resistance genes were limited  
406 by few studies (n=22) on MGEs.

407 From Tables 2-4, majority of the resistance genes namely, *mecA*, *erm (B)*, *tet (M)*, *vanA* etc. were  
408 responsible for drug resistance to antibiotics such as aminoglycosides (gentamicin, streptomycin,  
409 kanamycin),  $\beta$ -lactams (penicillins, cephalosporins), fluoroquinolones (ciprofloxacin), macrolide  
410 (erythromycin), sulfamethoxazole/trimethoprim, tetracycline and glycopeptides (vancomycin)  
411 respectively, were widely distributed in Northern Africa (Tunisia, Algeria, Egypt, Morocco, and  
412 Libya) and Southern Africa (South Africa and Namibia). All the three different MGEs (*Tn916*,  
413 *SCCmec* and *IS16*) were reported in Tunisia, with two being reported in Kenya (*SCCmec* and  
414 *Tn916*). *IS16* was only reported in an *E. faecium* infection in Tunisia (Figure 3) whilst *mecA* was  
415 mostly associated with *SCCmec*. *erm (B)* and *tet (M)* were highly associated with *Tn916* and *IS16*.

416 In Africa, different studies have reported *SCCmec*-borne *mecA* in *S. aureus* in humans, animals and  
417 the environment <sup>46,82,101-103</sup> besides the discovery of *IS16* and *Tn916* in the environment of *erm(B)* and  
418 *tetM* genes in Enterococcus and Streptococcus. These reports show that MGEs are mediating the  
419 dissemination of these (and possibly other) resistance genes across different GPB clones and  
420 species. MGEs-mediated mobilization of various resistance genes in different GPB clones and

421 species in humans, animals and the environment (Tables 1-4) calls for prompt measures to contain  
422 ABR as the situation may worsen if additional resistance genes are acquired by the MGEs.  
423 Resistance genes on MGEs can be horizontally transferred to susceptible cells or vertically  
424 transferred to daughter clones<sup>60,104,105</sup>, which can easily spread these resistance genes to  
425 susceptible pathogens. The higher number of resistant Gram-positive cocci and mean resistance  
426 rate in Tunisia may be due to the presence of these three MGEs in this region<sup>69,71,72,106</sup>

## 427 **2.6 Molecular epidemiology of antibiotic-resistant GPB**

### 428 *Staphylococcus spp. (S. aureus, S. haemolyticus and S. saprophyticus)*

429 *Staphylococcus spp.*, including *mecA*-harbouring methicillin resistant clones, have been described  
430 in humans, animals and the environment in Northern, Western, Central, Eastern and Southern  
431 Africa with varying but substantial frequencies and resistance rates. Common STs, resistance  
432 genes and MGEs were identified in humans, animals and the environment.

### 433 **North Africa: Algeria, Egypt, Morocco, Tunisia, Libya**

#### 434 *Algeria.*

435 *S. aureus* was recovered from two different studies in Algeria. In assessing the nasal carriage of *S.*  
436 *aureus* in patients with medical conditions including pneumonia, urinary tract infections,  
437 osteoarthritis, heart diseases, diabetes and chronic kidney disease, Djoudi *et al.* (2014) isolated  
438 MRSA<sup>79</sup>. They also found nasal carriage of *S. aureus* to be significantly associated with cancer  
439 and previous hospitalization of patients with kidney failure due to immunological suppression and  
440 hemodialysis. The nine MRSA isolates, i.e. ST80 (n=4), ST5 (n=2), ST22 (n=2) and ST535 (n=1),  
441 harboured *mecA* and were resistant to tobramycin (n=6), gentamicin (n=1),  
442 trimethoprim/sulfamethoxazole (n=2), tetracycline (n=3) and erythromycin (n=1). MRSA ST80 is

443 a well-known and frequent etiological agent of infections in North Africa and Middle-East  
444 countries<sup>119,120</sup>. Typing of 64 MRSA isolated from human pus (n=47), venous catheters (n=7),  
445 tracheal aspirates (n=4), puncture fluids (n=3), blood (n=2) and urine (n=1) in 64 Algerian patients  
446 revealed that 50 were hospital acquired (HA-MRSA) and 14 community acquired (CA-MRSA),  
447 which were all resistant to ceftazidime and oxacillin<sup>101</sup>. *MecA*, mobilized by *SCCmec*, was the only  
448 detected mechanism of resistance.

#### 449 *Egypt*

450 MRSA have been respectively isolated in five animal-based and two human-based studies in Egypt  
451 between 2011 to 2017. Hashem et.al (2013) isolated 94 *S. aureus* strains from blood and wounds  
452 in which 45 were MRSA while 25 were fluoroquinolone-resistant<sup>52</sup>. Mutations such as C2402T,  
453 T2409C, T2460G, T1497C, and A1578G in gyrase enzymes, which leads to fluoroquinolones'  
454 target-site alterations, were implicated in resistance to fluoroquinolones (ciprofloxacin,  
455 levofloxacin, ofloxacin). The high rate of fluoroquinolone resistance (55.56%) among MRSA  
456 infections is rather concerning as patients unable to tolerate vancomycin are treated with other  
457 antibiotics such as fluoroquinolones. Vancomycin is often reserved as a last-resort therapy for  
458 MRSA infections due to their high resistance to several antibiotics.

459 Multidrug resistance to drugs such as gentamicin, ampicillin, amoxicillin, cefepime, tetracycline  
460 and chloramphenicol in MRSA is mediated by diverse resistance mechanisms including  
461 impermeability effects and efflux pumps. Unrestricted access to antibiotics and inappropriate  
462 prescriptions were responsible for the high rates of drug resistance in this study<sup>52</sup>. In a similar  
463 study, MRSA was isolated from patients suffering from surgical wound infections, diabetic foot,  
464 abscess and burns. Although *mecA* was the only mechanism of resistance, the isolates were

465 multiple-resistant to several antibiotics belonging to the  $\beta$ -lactams, aminoglycosides,  
466 fluoroquinolones, macrolides, lincosamides, tetracyclines and glycopeptides, indicating other  
467 mechanisms of resistance <sup>121</sup>. It therefore implies that administration of such antibiotics will not  
468 relieve patients from *S. aureus* infections. The high rate of *S. aureus* isolation confirms it to be the  
469 most prevalent Gram-positive pathogen isolated from soft tissue and wound infections.

470 Al-Ashmawy *et. al.* detected a high rate of MRSA (53%) in milk and dairy products believed to  
471 originate from human contamination rather than contamination from animals. Besides being  
472 resistant to  $\beta$ -lactams and other antibiotics, thirty-six of the isolates were resistant to vancomycin  
473 known to be effective in treating MRSA infections <sup>30</sup>, making milk and dairy products a significant  
474 source of multidrug-resistant and toxigenic *S. aureus* infections. The occurrence of MRSA in pets  
475 such as dogs admitted in a veterinary clinic <sup>112</sup> may confirm a possible route in the community  
476 transmission of this pathogen, which is emerging as a veterinary pathogen of public health  
477 importance.

478 In 2017, Osman and colleagues detected *Staphylococcus spp.* in imported beef meat. Sixteen of  
479 these isolates were MDR and showed resistance to different groups of antibiotics due to resistance  
480 mechanisms such as *mecA*, and mutations in *gyrA* and *gyrB*. Indeed, MRSA has made methicillin  
481 and other  $\beta$ -lactams antibiotics clinically useless as a result of their high MDR <sup>122</sup>. Imported meat  
482 acts as a transmission vector for MRSA and is worrisome as *Staphylococcus spp.* are among the  
483 most common foodborne pathogens causing food poisoning outbreaks worldwide. Of 133 *S.*  
484 *aureus* recovered from animal origin, more than 70% were MDR and 30 were MRSA, exhibiting  
485 high resistance to clindamycin, co-trimoxazole, tetracycline, oxacillin, cefoxitin, ceftriaxone and  
486 erythromycin; four of the isolates were resistant to vancomycin <sup>46</sup>. The isolates showed the  
487 maximum sensitivity to imipenem, chloramphenicol and rifamycin, which is consistent with

488 similar reports in China and Pakistan <sup>123,124</sup>, indicating their effectiveness in treating *S. aureus*  
489 infections.

490 In 2016, MRSA was isolated from chicken products mainly due to poor hygienic handling  
491 processes, posing a risk to public health. The mean *S. aureus* count in the chicken products were  
492 beyond the permissible limits of the Egyptian organization for Standardization and Quality Control  
493 (EOSQC 2005), coupled with resistance to different antibiotics classes; thus, retail chicken  
494 products could constitute a high health risk to human consumers <sup>51</sup>

495

#### 496 ***Morocco***

497 In a study to assess *S. aureus* carriage among end-stage renal diseases patients undergoing  
498 hemodialysis, 42.9% were carriers, of which only one was MRSA. The methicillin-susceptible *S.*  
499 *aureus* (MSSA) was resistant to many of the local antibiotics, thus limiting the successful treatment  
500 of MSSA infections. Moreover 81.8% of the MSSA were penicillin-resistant. The male gender  
501 and age 30 or below were identified as risk factors of *S. aureus* nasal carriage ( $P$ -value < 0.001)  
502 <sup>50</sup>. Periodic monitoring of patients with hemodialysis is crucial as they are at increased risk of *S.*  
503 *aureus* infection due to periodic hospitalization, immunosuppression and high invasive vascular  
504 interventions.

505

#### 506 ***Tunisia***

507 Resistant *S. aureus* was isolated from the environment, animals and humans between 2011 to 2017.  
508 Ben Said, et al. recovered 12 MSSA from wastewater samples that were resistant to penicillin  
509 (n=12 isolates), erythromycin (n=7 isolates), tetracycline (n=1 isolate) and clindamycin (n=1  
510 isolate) due to the presence of *blaZ* (n=7), *msr(A)* (n= 7) and *tetK*(n=1). These resistant strains  
511 were of ST3245(n=7) and ST15(n=1) <sup>41</sup>, which have been also reported in animals and humans.



512 In an investigation to evaluate the prevalence of coagulase-negative Staphylococcus (CoNS) in the  
513 hospital environment, MDR *S. haemolyticus* and *S. saprophyticus* were the most dominant.  
514 Methicillin resistance was detected in *S. haemolyticus*, *S. epidermidis* and *S. saprophyticus*. These  
515 isolates were resistant to erythromycin, tetracycline, gentamicin, kanamycin, tobramycin and  
516 streptomycin due to the presence of *msrA* (32), *ermC* (8), *tetK* and *tetM*, *aac(6')-Ie-aph(2'')-Ia*  
517 (16), *aph(3')-IIIa*(19), *ant(4')-Ia* (n=14) and *ant(6')-Ia* (3) <sup>125</sup>. The high prevalence of MDR  
518 *Staphylococci spp.* isolates may result from transmission between the staff, patients and the  
519 environment. Strict infection controls are needed as infections caused by CoNS are common  
520 causes of death, particularly in low-birth-weight children, and are opportunistic infections in  
521 immunocompromised patients <sup>126</sup>.

522 Moreover, nasal swab from sheep detected five MRSA (*mecA*=5), which were all of ST153 and  
523 carried *blaZ*, *ant(6)-Ia*, *aph(30)-IIIa*, *erm(C)*, *tet(K)*, and *fusB* genes that respectively encoded  
524 resistance to penicillin, streptomycin, kanamycin, erythromycin, tetracycline and fusidic acid. This  
525 study shows that the nares of healthy sheep could act as reservoirs of MRSA <sup>107</sup>.

526 Between 2011 to 2012, 99 MRSA strains were detected from nasal swabs, blood, catheter, wounds,  
527 pleural puncture and abscess, among which 39 were tetracycline resistant. These isolates were  
528 resistant to aminoglycosides, fluoroquinolones, macrolides and lincosamide, with mechanisms of  
529 resistance including *mecA* (n=24), *tet(K)* (n=6), *tet(L)* (n=1) and/or *tet(M)* (n=18), *erm (A)*(n=14),  
530 *aph(2')-acc(6')* (n=13). Identified drug-resistant strains included ST247 (n=12), ST239 (n=6),  
531 ST728 (n=2), ST241 (n=1), ST398 (n=1), ST5 (n=1) and ST641 (n=1) <sup>111</sup>. For the first time, clonal  
532 lineage ST398, which has been reported in pigs from several studies in USA, South America, Asia  
533 and Canada <sup>127-130</sup>, was found in human MRSA isolates in Africa in a nasal swab of a 74-year old  
534 patient.



535 Additionally, 69 MRSA strains were isolated from hospital-acquired and community-acquired  
536 infections. Although *mecA* (n=59) was the only mechanism of resistance identified, the isolates  
537 were resistant to aminoglycosides, tetracycline, fluoroquinolones, macrolides and rifampicin. The  
538 resistant clones were ST80 (n=41), ST1440 (n=1), ST1 (n=2), ST5 (n=5), ST22 (n=1), ST97 (n=2),  
539 ST239 (n=4), ST241 (n=3), ST247 (n=3), ST1819 (n=3), ST153 (n=2), ST256 (n=1) <sup>47</sup>.  
540 Mezghani Maalej and colleagues (2012) isolated five pristinamycin-resistant *S. aureus* strains  
541 from patients with skin infections. These isolates were MDR (Table 2), being the first detection of  
542 resistance to streptogramins due to *vat(B)* and *vga(B)* resistance genes <sup>131</sup>, which emerged due to  
543 selective pressure from the use of pristinamycin. Thirty-six methicillin-resistant *S. haemolyticus*  
544 (MRSHae) were isolated from neutropenic patients (suffering from febrile neutropenia) with  
545 hematological cancer between 2002 and 2004. These MDR isolates carried *SCCmec*-borne *mecA*  
546 (Table 2) <sup>132</sup>, which agrees with a report on *S. haemolyticus*' MDR capacity, particularly in  
547 immunocompromised patients <sup>133,134</sup>

#### 548 ***Libya***

549 Due to the high risk of MRSA colonization developing into infections in children, nasal samples  
550 were collected from children inpatients, their mothers, healthcare workers and outpatients'  
551 workers, which yielded a MRSA nasal carriage rate of 8.3%, 11% ,12.3% and 2.2% respectively  
552 in Libya <sup>135</sup>. Thus, nasal carriage of MRSA is common in inpatients children, their mothers and  
553 health workers in Libya and could be a source of MRSA infections.

#### 554 **West Africa: Ghana, Nigeria, Senegal**

##### 555 ***Ghana***

556 Among 308 staphylococcus isolates collected across Northern, Central and Southern Ghana in  
557 2013, low prevalence of antibiotic resistance was reported except for penicillin (97%), tetracycline

558 (42%) and erythromycin (6%)<sup>136</sup>. Moreover, *mecA* was detected in only nine isolates, implying  
559 the presence of other  $\beta$ -lactam resistance mechanisms. The MRSA clones included ST88 (n=2),  
560 ST8 (n=1), ST789 (n=1), ST72 (n=1), ST2021 (n=1), ST250 (n=2), and ST239 (n=1). In a similar  
561 study that characterized 30 MRSA isolates resistant to tetracycline, fluoroquinolones and  
562 macrolides, *tet(M)* (n=13), *tet(K)* (n=10), *aphA3* (n=7), *aacA-aphD* (n=5) and *erm(C)* (n=4) were  
563 detected. Similar and different resistant clones, viz. ST88 (n=8), ST8 (n=5), and ST247 (n=4) were  
564 detected<sup>137</sup>, indicating high MRSA clonal diversity in Ghana. These studies show a high rate of  
565 resistance to non- $\beta$  lactams that further complicate MRSA treatment. Furthermore, the isolation of  
566 USA300 and other epidemic multidrug-resistant MRSA clones calls for MRSA surveillance and  
567 adequate control measures.

## 568 *Nigeria*

569 Five different studies reported drug-resistant *S. aureus* from several human anatomical sites such  
570 as throat swabs, soft skin and tissue infection, urinary tract and respiratory infections, wound,  
571 vagina, otitis, conjunctivitis, septicemia and bronchitis. Of a total  $\geq 602$  isolates,  $\geq 433$  were  
572 resistant to several antibiotic classes (Table 1). Of note, 429 of the  $\geq 433$  drug-resistant isolates  
573 were all resistant to cotrimoxazole or trimethoprim/sulfamethoxazole (TMP/SMX). Mechanisms  
574 of resistance included *mecA* ( $\geq 54$ ), *blaZ* (n=284), *dfrA* ( $\geq 5$ ) and *dfrG* ( $\geq 152$ ). *S. aureus*-resistant  
575 clones ST8, ST152, ST772, ST14, ST241, ST37, ST39, and ST88 were present. Colonized  
576 persons, including immune-compromised individuals, facilitated the spread of *S. aureus* and  
577 MRSA ST8 identified as ubiquitous in various geographic areas of Nigeria. High utilization of  
578 cotrimoxazole or TMP/SMX because of low cost and easy obtainability through lenient medication  
579 regulations were implicated for the high resistance<sup>115</sup>. Besides *S. aureus*, *S. haemolyticus* was the  
580 major species isolated, and is considered as the second most detected and clinically important

581 *Staphylococci spp.*, particularly in immunocompromised patients <sup>138</sup>. All the *S. haemolyticus*  
582 isolates detected were resistant to at least three antibiotics classes (Tables 2-4) <sup>139</sup>.  
583 Moreover, O. Ayepola *et al.* (2015) reported a higher rate of 20.8% *S. aureus* from UTIs than the  
584 reported ranges in Africa (6.3-13.9%), and far exceed the rate reported from Europe and Brazil  
585 (1.1%) <sup>140</sup>. None of the isolates exhibited resistance to vancomycin, linezolid, daptomycin and  
586 mupirocin; indicating their usefulness in treating *S. aureus* infections. Co-trimoxazole, which was  
587 previously clinically valuable in treating MRSA infections, demonstrated the highest level of  
588 resistance, hence it's not recommended <sup>106,115,116,139</sup>. In a study to examine the genetic  
589 mechanism(s) of resistance in CoNS in faecal samples, all the 53 isolated CoNS were Penicillin  
590 V-resistant and between three to 19 exhibited multidrug resistance (Table 2); *mecA* (n=15), *ermC*,  
591 *tetM* (n=4) and *tetK* (n=6) were identified <sup>139</sup>. CoNS isolates from faeces carrying tetracycline,  
592 macrolides and aminoglycosides resistance genes may transfer them inter- and intra-species,  
593 disseminating MDR in *Staphylococcus*.

#### 594 *Senegal*

595 A low prevalence of MRSA (10.52%) was reported in Senegalese pigs compared to those reported  
596 in developed countries. This might be due to a lesser veterinary antibiotic use as growth promoters  
597 and/or for therapy. However, all the isolates were resistant to penicillin, 27 were resistant to  
598 cotrimoxazole and 16 were resistant to tetracycline <sup>82</sup>. Five of the MRSA were of ST5 <sup>82</sup>, evincing  
599 the spread of this clone in animals, humans <sup>79,80</sup>, and the environment <sup>47</sup>; the importance of this  
600 clone as a cause of human infections is well-established <sup>84</sup>.

#### 601 *Cape verde*

602 In Cape Verde, a low prevalence of 5.6% (6/107) MRSA nasal carriage was documented in 2015.  
603 The predominant MRSA clones was ST5 (n=3), ST88 (n=2) and ST8 (n=1). These isolates showed  
604 significant level of resistance to ERY, SXT and PEN <sup>141</sup> .

## 605 **Central Africa: Gabon, D.R. Congo**

### 606 ***Gabon***

607 In Gabon, *S. aureus* isolated from colonized persons, blood, as well as soft and skin tissue  
608 infections resulted in 49% (104/212) resistance to trimethoprim: *dfrA* (n=1), *dfrG* (n=100),  
609 *dfrK+G* (n=1), *dfrB* (n=2), and *mecA* (n=1) were detected in the isolates <sup>114</sup>. Thus, *dfrG* is  
610 obviously the most abundant and common trimethoprim resistance mechanisms in Africa, refuting  
611 *dfrB* mutation as the main mechanism of resistance to trimethoprim <sup>142-144</sup>.

### 612 ***D.R. Congo (DRC)***

613 A total of 215 (79.34%) drug-resistant *S. aureus* isolates were collected between 2015 to 2017  
614 from nasal swab and bloodstream infections in the D. R. Congo; 70 isolates were MRSA. Other  
615 major resistance genes mediating resistance to trimethoprim/sulfamethoxazole, aminoglycoside,  
616 macrolides, tetracycline, penicillin, and chloramphenicol were *dfrG* ( $\geq 120$ ), *tetK* ( $\geq 98$ ), and *femA*  
617 ( $\geq 98$ ). MRSA showed high-level resistance to  $\beta$ -lactams, aminoglycoside, macrolides and  
618 tetracycline. The pathogen caused severe infections such as pneumonia, meningitis, complicated  
619 urinary tract infections, gynaecological infections and peritonitis. *S. aureus* ST8 ( $\geq 47$ ) was the  
620 dominant clone, followed by ST152 ( $\geq 17$ ), ST5 ( $\geq 2$ ) and ST88 ( $\geq 2$ ). In DRC, MRSA ST8  
621 outnumbers the African MRSA clone ST88, which is dominant in Africa. The high-level oxacillin  
622 resistance in DRC was associated with a mutation in *femA* (Y195F) whilst high-level trimethoprim  
623 resistance was due to the detection of *dfrG*, which is consistent with trimethoprim resistance in  
624 Africa and Asia. In Africa, TMP/SMX or cotrimoxazole is frequently administered as prophylactic

625 to immuno-suppressed patients such as HIV/AIDS patients to prevent opportunistic infections  
626 such as *Pneumocystis carinii* pneumonia, toxoplasmosis and bacterial pneumonia<sup>145</sup> Hence,  
627 prophylactic use of TMP/SMX in HIV patients may impact resistance. Additionally, there was  
628 high-level MDR among MRSA, which is a great concern as microbiological laboratories/facilities  
629 and second-line antibiotics are rare in DRC. Moreover, the detection of nasal carriage among  
630 healthcare workers' demands strict infection controls and surveillance<sup>81,146,147</sup>.

### 631 **East Africa: Kenya, Tanzania**

#### 632 *Kenya*

633 In contrast to earlier studies done in Kenya, Omuse and colleagues (2016) detected a wide genetic  
634 diversity of MRSA and well-established epidemic MRSA clones among clinical isolates. MRSA  
635 clonal complexes 5, 22 and 30, implicated in several outbreaks were described. These clones  
636 included ST22 (n=4), ST88 (n=1), ST789 (n=1), ST5 (n=1), ST8 (n=2), ST241 (n=12) and ST239  
637 (n=2). Approximately 41% of the MRSA in the study were MDR (Table 2), showing resistance to  
638 clindamycin, erythromycin and TMP/SMX<sup>102</sup>. Detection of these clones in referral hospitals in  
639 Kenya calls for implementation of strict infection control measures to reduce the high morbidities  
640 and mortalities associated with HA-MRSA infections.

#### 641 *Tanzania*

642 In a study to investigate the molecular epidemiology of trimethoprim resistance in MSSA causing  
643 skin and soft tissues infections, *dfrG* was detected in all 32-trimethoprim resistant isolates. Other  
644 reported trimethoprim resistance mechanisms such as *dfrA*, *dfrB* and *dfrK* were missing,  
645 confirming *dfrG* as the main trimethoprim resistance mechanism in Sub-Sahara Africa<sup>114</sup>.

#### 646 *Uganda*

647 A MRSA carriage of 56.1% (23/41) was detected in milk from pastoral communities in Uganda,  
648 exactly 70% of which were tetracycline-resistant. MRSA clones ST97 and ST1 were identified.  
649 Furthermore, over 90% of the isolates carried genes encoding enterotoxin that causes food-borne  
650 diseases. The weak veterinary delivery system and the high dependency on animals and animal  
651 products for food in Uganda was implicated for the high prevalence of MRSA <sup>148</sup>.

652 *S. aureus* isolates, including 24 MRSA and 40 MSSA, were isolated from patients with surgical  
653 site infections (SSI). The MRSA isolates were MDR (including resistance to oxacillin, gentamicin,  
654 ciprofloxacin and chloramphenicol) compared to the MSSA. Inducible clindamycin resistance was  
655 found in 17.2% of the isolates, mostly in MRSA. In a multivariate analysis, inducible clindamycin  
656 resistance and cancer were identified as independent predictors of MRSA-SSI <sup>149</sup>.

## 657 **Southern Africa: Angola, Malawi, Mozambique, Namibia, South Africa**

### 658 *Angola*

659 Conceição et al (2014) reported a nasal *S. aureus* carriage of 23.7% (n=128), out of which 58.1%  
660 (n=77) were MRSA. Fifty-seven of the MRSA clones were of ST5, followed by ST88 (n=9), ST8  
661 (n=5) and ST72 (n=3). This study represents the first description of the spread of MRSA ST5 in  
662 Africa. All the 77 MRSA strains were resistant to SXT, FOX and PEN <sup>150</sup>. In a study to identify  
663 oxacillin-susceptible *mecA*-positive *S. aureus* (OS-MRSA) for the first time in Africa, a prevalence  
664 of 17.7% was detected among healthy healthcare workers in Angola and Saõ Tome' & Principe,  
665 making them potential OS-MRSA reservoirs <sup>151</sup>. OS-MRSA have been reported worldwide in  
666 humans, animals and food animals <sup>152-155</sup>. The OS-MRSA isolates expressed MDR (Table 2) and  
667 belonged to ST88 (n=15) and ST8 (n=9). In sub-Saharan Africa, the identification of clinically  
668 important *S. aureus* is heavily based on phenotypic agar-screening and oxacillin disc-diffusion  
669 methods.

670 ***Mozambique***

671 The prevalence of HA-MRSA and CA-MRSA in Mozambique was found to be 15.1% and 1%,  
672 respectively. MRSA showed high-level resistance to penicillin, cefoxitin, gentamicin,  
673 ciprofloxacin, erythromycin, TMP/SMX, chloramphenicol and tetracycline, compared to MSSA.  
674 Additionally, inducible macrolide–lincosamide–streptogramin B (MLSB) resistance was 41.7%  
675 and 10.7% in hospital-acquired *S. aureus* (HA-SA) and community-acquired *S. aureus* (CA-SA)  
676 isolates respectively <sup>156</sup>, further limiting therapeutic options for *S. aureus* infections. This study,  
677 which is the first to detect the emergence of HA-MRSA within post-operative abdominal wounds  
678 and burn wounds in Mozambique, reported that patients with infected burn wounds had a  
679 significantly longer hospitalisation than patients with post-operated abdominal wounds. Efforts to  
680 prevent the transmission of MDR HA-SA, such as education on proper hand-washing techniques,  
681 are urgently needed.

682 ***Namibia***

683 The dominant resistance gene mediating trimethoprim resistance in MRSA and MSSA in Namibia  
684 was *dfrG*. This is similar to reports in other Africa countries <sup>114</sup>. Moreover, *dfrG* was frequently  
685 detected in *S. aureus* from SSTIs in travelers returning from other African countries, suggesting  
686 that *dfrG* can be transmitted into populations with low antifolate resistance such as North America  
687 and Europe <sup>157,158</sup>.

688 ***South Africa***

689 Thirty MDR *S. aureus* were recovered between April 2015 to April 2016 from ten beaches in the  
690 Eastern Cape Province, South Africa (Table 2). Notably, the isolates harbored *mecA*, *femA*, *rpoB*,  
691 *blaZ*, *ermB* and *tetM* <sup>29</sup>, making marine environments and public beaches potential depositaries of  
692 MDR *S. aureus* that can be transmitted to animals and humans. Further, the 50% resistance to

693 vancomycin recorded is concerning to global health due to its role as a last-resort antibiotic for  
694 treating MRSA infections.

695 *S. aureus* was detected in raw and pasteurized milk at an isolation rate of 75% and 29%  
696 respectively, due to inefficient thermal processing and post-process contamination. A high  
697 proportion (60%-100%) of these isolates showed resistance to aminoglycosides,  $\beta$ -lactams,  
698 vancomycin, tetracycline and erythromycin, albeit only 19 *mecA* genes were present <sup>44</sup>. Evidently,  
699 raw and pasteurized milk can harbour MDR *S. aureus*, exposing consumers to colonization and/or  
700 infections. Again, *Staphylococcus spp.*, including *S. aureus*, *S. haemolyticus*, *S. xylosus* and *S.*  
701 *capitis* were isolated from healthy pigs and cattle, of which between 75 to 100% were resistant to  
702 penicillin G, tetracycline, sulfamethoxazole and nalidixic acids, due to their use as growth  
703 promoters; *MecA* and *mphC* were identified. Additionally, 12% of the isolates were resistant to  
704 vancomycin and erythromycin, evincing the important role of animals in the dissemination of  
705 resistance determinants and the importance of commensals to public health <sup>118</sup>.

706 Van Rensburg et al. <sup>80</sup> detected 43.4% (1432/3298) and 3.1% (328/10448) rifampicin resistance  
707 rate among MRSA and MSSA respectively. Similar studies in South Africa have also reported of  
708 high rifampicin resistance in MRSA <sup>159,160</sup>, obviously due to frequent use of rifampicin among  
709 tuberculosis patients, who are highly prevalent in South Africa. MRSA ST5 and ST612 were  
710 detected while H481Y/N and I527M mutations in *rpoB* were associated with high-level rifampicin  
711 resistance, similar to reports in Italy <sup>161</sup>. Additionally, novel H481N, I527M, K579R mutations  
712 were also detected.

713 Three studies reported a prevalence of 29.1% <sup>162</sup>, 45.44% <sup>103</sup> and 100% <sup>163</sup> MRSA recovered from  
714 humans, expressing resistance to macrolides, tetracycline, aminoglycoside, cotrimoxazole and  
715 rifampicin. MRSA ST612, ST239, ST36 and ST5 were the dominant strains similar to other



716 findings in Australia and Europe<sup>164</sup>. The study showed that *S. aureus* bacteremia is common and  
717 account for high mortality in South Africa. For instance, in a study by Perovic et al.,<sup>162</sup> 202 patients  
718 died from *S. aureus* bacteremia infections, with HIV patients being more likely to acquire HA-  
719 MRSA. The isolates were however susceptible to glycopeptides, fluoroquinolones, linezolid,  
720 tigecycline, fosfomycin and fusidic acid, confirming their clinical usefulness in treating MRSA  
721 infections. In a recent study, a high prevalence and genetic diversity of multi-drug efflux (MDE)  
722 resistance genes were found in clinical *S. aureus* isolates, including 81 MRSA and 16 MSSA<sup>165</sup>.  
723 *NorA*, *norB*, *mepA*, *tet38*, *sepA*, *mdeA*, *imrs* and *sdrM* were present in at least 86% of the isolates,  
724 predicting resistance to broad-spectrum biocides and fluoroquinolones, which is disturbing. Efforts  
725 to develop efflux pump inhibitors can mitigate such resistance mechanisms.

#### 726 ***Sao Tome & Principe***

727 MRSA prevalence of 26.9%<sup>166</sup> and 25.5%<sup>141</sup> was reported in nasal swabs in 2014 and 2015,  
728 respectively, in Sao Tome & Principe. Additionally, a high prevalence of oxacillin-susceptible  
729 *mecA*-positive *S. aureus* was reported in the same study in Sao Tome & Principe and Angola<sup>151</sup>.  
730 The most dominant MRSA clone was ST8 (n=25), followed by ST5 (n=13) and ST80 (n=13). High  
731 genetic variability was found in the MSSA strains. Both MRSA and MSSA showed different levels  
732 of resistance to SXT, ERY, CIP and TET; however, all the MRSA isolates were resistant to  
733 cefoxitin.

#### 734 ***Streptococcus spp. (S. pyogenes, S. pneumoniae and S. agalactiae)***

735 Drug resistant *Streptococcus spp.* including *S. agalactiae* and *S. pyogenes* have been identified in  
736 Northern, Eastern and Southern Africa. *S. pyogenes* were reported in only humans whilst *S.*

737 *agalactiae* was reported in both animals (camels) and humans with a high rate of resistance to  
738 tetracycline and erythromycin.

### 739 **North Africa: Algeria, Egypt, Morocco, Tunisia, Libya**

#### 740 **Algeria**

741 A sole study has so far detected 44 tetracycline (100%, 44/44)- and erythromycin-resistant  
742 (43.18%, 19/44) *S. agalactiae* from vaginal swabs; *tetM*; and *ermB* respectively mediated this  
743 resistance. A high diversity of resistant clones viz., ST1, ST19, ST10, ST158, ST166, ST233,  
744 ST460, ST521 and ST677 were detected<sup>108</sup>, which have been reported worldwide for causing life-  
745 threatening invasive diseases such a meningitis and sepsis<sup>167,168</sup>.

#### 746 **Egypt**

747 Similarly, Shabayek et al. (2014) detected 98% and between 14-17% *S. agalactiae* resistance to  
748 tetracycline and macrolides respectively. *TetM* was detected in all the 98 tetracycline-resistant  
749 isolates whilst *ermB* and *ermA* mediated erythromycin resistance. Efflux pump genes such as *tetK*  
750 (n=12), *tetL* (n=1) and *mefA/E* (n=1) were also found<sup>169</sup>, which reflects the increasing reports of  
751 *S. agalactiae* resistance to tetracycline and macrolides<sup>170</sup>. This study also showed that vancomycin  
752 and fluoroquinolones are effective replacement for erythromycin and clindamycin, and for patients  
753 allergic to penicillin. Although penicillin is the antibiotic of choice for treating *S. agalactiae*  
754 infections, reports of penicillin resistance in USA and China calls for increased surveillance in  
755 Africa<sup>170</sup>.

#### 756 **Tunisia**

757 *S. agalactiae*

758 From January 2007 to December 2009, 226 *S. agalactiae* were isolated from female genitals and  
759 gastric fluid of infected newborns. Of these, 97.35% (220/226), 40% (90/226) and 19.1% (43/226)  
760 were resistant to tetracycline, erythromycin and rifampicin respectively. Additionally, seven  
761 isolates were resistant to aminoglycoside (gentamycin and streptomycin) and chloramphenicol.  
762 *TetM* (n=205), encoding a ribosomal protection protein, which protect the ribosome from the  
763 action of tetracycline, was the main tetracycline resistance mechanism, and was significantly  
764 associated with *Tn916* (p-value = 0.0002). Other resistance genes including *ermB* (n=79) and *tetO*  
765 (n=50) were detected. All isolates were however susceptible to  $\beta$ -lactams and quinupristin-  
766 dalfopristin<sup>68</sup>. Between 2005 and 2007, 160 erythromycin-resistant *S. agalactiae* were isolated  
767 from humans, with a high resistance rate of 84.3% (135/160) to the constitutive macrolides-  
768 lincosamides, streptogramins B (MLSB)<sup>171</sup>.

#### 769 *S. pyogenes*

770 Hraoui *et al.*, (2011) reported a low macrolide resistance rate (5%, 5/103) and a high tetracycline  
771 resistance rate (70%, 72/103) among human isolates, with *tetM*, associated with *Tn916*, being  
772 responsible for tetracycline resistance<sup>172</sup>. Increase tetracycline use in food animals was implicated  
773 in this instance, leading to selection and dissemination of resistance genes from animals to human.  
774 Macrolide resistance was only detected in seven isolates, which is corroborated by the findings of  
775 Ksia *et al.* (2010), who detected low-level macrolides resistance among Children<sup>173</sup>.

#### 776 **East Africa: Kenya, Tanzania**

#### 777 **Kenya**

#### 778 *S. agalactiae*

779 In the horn of Africa, camel plays a significant role in the survival of humans by providing milk,  
780 meat and transportation. In 2013, Fischer et al. detected 36% (37/92) tetracycline resistance in *S.*  
781 *agalactiae* isolates from camels' wound infections and mastitis that was mainly mediated by a  
782 *Tn916*-borne *tetM*. ST616 (n=22) was the major resistant clone, followed by ST612 and ST617  
783 <sup>174</sup>. Shifting from tetracycline to other antibiotics is evidently necessary for effective treatment  
784 outcomes in camel infections in Kenya.

785 **Southern Africa: Angola, Malawi, Mozambique, Namibia, South Africa**

786 **South Africa**

787 *S. agalactiae*

788 A *S. agalactiae* colonization rate of 30.9% was detected from vaginal and rectal swabs of pregnant  
789 women. Similar to other reports in Africa, a high rate of tetracycline (94.5%, 120/128) and  
790 macrolide (21.1%, 27/128) resistance was documented. All the isolates were however sensitive to  
791 penicillin, ampicillin, vancomycin and gentamicin. Macrolide and clindamycin resistance were  
792 associated with *ermB* and *mefA* genes <sup>175</sup>. The study highlights the need for research on treatment  
793 options for patients allergic to penicillin due to high-level resistance in alternative drugs such as  
794 macrolides and lincosamides.

795 *Enterococcus spp. (E. faecium, E. faecalis, E. hirae, E. durans, E. gallinarum)*

796 *Enterococcus spp.*, predominately MDR and vancomycin-resistant (VR) *E. faecium* and *E.*  
797 *faecalis*, were isolated from humans, animals and the environment in Northern, Western, Eastern  
798 and Southern Africa. From the meta-analysis, *Enterococcus* isolates recorded the highest rate of  
799 resistance followed by *S. aureus*. Common resistance genes, clones and MGEs were found in  
800 humans, animals and the environment.

801 **North Africa: Algeria, Egypt, Morocco, Tunisia, Libya**

802 **Algeria**

803 The first study to molecularly characterize *Enterococcus spp.* from urinary tract and wound  
804 infections in Algeria revealed a high rate of resistance to erythromycin (86.4%,108/125),  
805 tetracycline (82.4,103/125), levofloxacin (71.2%,89/125) and gentamicin (54.4,68/125). Only  
806 3.2% (4/125) were VRE, confirming glycopeptides as ideal antibiotics for treating *Enterococcus*  
807 infections. A mortality rate of 10% was reported due to infections caused by *Enterococcus*. *E.*  
808 *faecium*, *E. faecalis* and *E. gallinarum* were the main *Enterococcus* isolated. Majority of these  
809 isolates were from females (53%). *ErmB* ( $\geq 92$ ) and *vanCI*( $\geq 4$ ) were the main mechanisms of  
810 resistance. A high genetic diversity among strains was seen in *E. faecium* and *E. faecalis*, with *E.*  
811 *faecium* ST78 being the dominant resistant strain <sup>176</sup>, which is also prevalent in Asian (Japan,  
812 Taiwan, China and Korea) and European (Italy and Germany) countries <sup>177-179</sup>. A novel ST317  
813 (n=33) clone was predominant among the *E. faecalis* isolates. Rational use of antibiotics, as well  
814 as close monitoring of the epidemiology of the strains are crucial.

815 **Egypt**

816 In a similar study to characterize *E. faecium* and *E. faecalis* from patients, 82% of the isolates were  
817 MDR, showing high-level resistance to aminoglycosides,  $\beta$ -lactams and tetracycline. *VanA* was  
818 detected in two *E. faecium* isolates, all of which were resistant to all antibiotics tested.  
819 Bioinformatic (sequence) analysis revealed that *vanA* was transmitted horizontally to *S. aureus*,  
820 showing the importance of horizontal gene transfer in ABR and subsequent management of  
821 enterococci infections such as bacteremia, endocarditis and urinary tract infections <sup>180</sup>.

822 **Tunisia**

823 Antimicrobial-resistant Enterococcus was found in faeces of pet and camel, irrigation water from  
824 farm environments, food vegetables, hospital environments, animal meat and patients in Tunisia  
825 <sup>42,45,71,181–183</sup>. High-level resistance to vancomycin, macrolides, aminoglycosides,  $\beta$ -lactams and  
826 tetracycline was detected in the environment, animals and humans with majority of the isolates  
827 being *E. faecium*, followed by *E. faecalis*. *TetM*, *tetL*, *ermB*, *ant (6)-la*, *vanA* and *aph(3')-IIIa* were  
828 the major resistance mechanisms, with *IS16* being the main MGE disseminating the resistance  
829 genes. *E. faecium* *ST80*, *ST910* and *ST16* were the dominant resistant clones in Tunisia. The studies  
830 show that meat, animals, pets, hospital environment and wastewater used for farm irrigation play  
831 a crucial role in the spread of antibiotic resistant Enterococcus.

## 832 **West Africa: Cape Verde, Ghana, Nigeria, Senegal**

### 833 **Nigeria**

834 *Enterococcus spp.* isolated from poultry and cattle as well as their manure demonstrated high-level  
835 resistance to tetracycline, erythromycin, gentamicin, ampicillin and streptomycin. Sixty isolates  
836 were MDR, showing resistance to three or more antimicrobials <sup>184</sup>. The rate of MDR is a reflection  
837 of the substantial use of broad-spectrum antibiotics in Nigeria, raising major public health concerns  
838 as practices such as the use of untreated poultry and cattle manure for fertilizing agricultural soils,  
839 particularly vegetables, are a common practice in Africa. This could transfer MDR Enterococci to  
840 humans, and cause serious nosocomial infections including endocarditis, bacteremia and urinary  
841 tract infections that can result in high morbidities and mortalities.

842 Ngbede et al. (2017) recently characterized 63 ampicillin- and 37 gentamicin-resistant *E. faecium*  
843 from vegetables, soil, farms, animal and manure <sup>48</sup>. Approximately 95% (35/37) and 8% (5/63) of  
844 the aminoglycoside- and ampicillin-resistant clones were recognized as high-level  
845 aminoglycosides- and ampicillin-resistant *E. faecium* respectively. Modifying enzymes' genes

846 such as *aac(6')-Ie-aph(2'')-Ia*, *aph(2')-Ic*, *aph(3')-IIIa*, and *ant(4')-Ia* accounted for the  
847 aminoglycoside resistance.

## 848 **East Africa: Kenya and Tanzania**

### 849 **Tanzania**

850 In a study to determine if cattle co-grazing with wild life influence ABR, ABR in wild animals  
851 such as buffalo, zebra and wildebeest was higher than in cattle, although wildlife is periodically  
852 treated with antibiotics. Ten VRE and ampicillin-resistant Enterococcus were found in the wild  
853 animals but not cattle. Additionally, Enterococcus isolates from wildlife were highly resistant to  
854 tetracycline, rifampicin, macrolides, aminoglycosides and cotrimoxazole<sup>32</sup>. *TetW* and *sullI* were  
855 the resistance genes identified in the isolates. The practice of co-grazing possibly resulted in  
856 transmission of ABR genes from livestock to wildlife. The high presence of ABR bacteria in  
857 wildlife was likely due to contact with more environmental surfaces that have been contaminated  
858 with human, birds or animal excreta. Result from this study demonstrates the presence of ABR  
859 Enterococci in wild animals without antibiotic pressure.

## 860 **Southern Africa: Angola, Malawi, Mozambique, Namibia, South Africa**

### 861 **South Africa**

862 Multiple antibiotic-resistant Enterococci were isolated from borehole water, waste water, pigs and  
863 humans in South Africa. Notably, a very high-level vancomycin, aminoglycoside,  $\beta$ -lactam,  
864 macrolides and fluoroquinolones resistance was detected among the Enterococci isolates  
865 compared to other countries. *ErmB* ( $\geq 300$ ), *vanC* 2/3 (162), *vanB* ( $\geq 138$ ), *vanC* ( $\geq 120$ ), *strA* ( $\geq 120$ )  
866 were the major resistance genes. The vancomycin-resistant isolates were from patients with  
867 haematological malignancies, bacteremia, pigs, wastewater and underground water<sup>27,28,49,85</sup>.  
868 Inefficient chlorination to kill bacteria accounted for the high resistance rates in the final effluents'

869 discharge into the environment. Hospital wastewater is therefore a major source of MDR  
870 Enterococcus. Sub-therapeutic antibiotic usage in animal feed also accounted for the emergence  
871 of ABR in pigs whilst the construction of boreholes near pit toilets resulted in high enterococcal  
872 isolation and resistance rates in South Africa.

### 873 **3. CONCLUSION AND STUDY LIMITATIONS**

874 The high rate of ABR among GPB to important antibiotics in Africa is a major threat to clinical  
875 medicine, the economy and socio-economic development. This calls for national as well as  
876 international rules and regulations to contain resistance. Heavy consumption of antibiotics in  
877 animal feed, exchange of resistance genes between animals and food animal products to man,  
878 uncontrolled and inappropriate antibiotics prescription practices, inadequate hygienic handling and  
879 processing of food, close contact with pet dogs, shedding of resistant clones from animals to  
880 humans and the environment, as well as high consumption of antibiotics in humans, particularly  
881 in HIV patients, account for the high rate of ABR in Africa.

882 Effective surveillance and monitoring of antimicrobial drug usage and licensing, banning or  
883 restricting the prescription of reserved, expired and substandard drugs, periodic monitoring of  
884 pharmacies and veterinary shops, and antibiotic stewardship are recommended measures to contain  
885 ABR. Improving animal health through hygienic practices on farms, avoiding prophylactic or  
886 growth-promoting antibiotic usage in veterinary medicine, integrative efforts between human and  
887 veterinary medicine as well as environmental health are urgently needed to contain ABR.  
888 Implementation of these policies will decrease the high rate of ABR in Africa, reduce longer  
889 hospital stays and the resort to expensive but toxic antibiotic alternatives, with a concomitant  
890 reduction in morbidity and mortality rates. Few studies reporting on the molecular determinants of



891 ABR in GPB in Africa limited the study to 77 articles. Among these, only few studies reported on  
892 MGEs and resistant clones.

### 893 **Experimental procedures used in included studies**

894 The studies included in this review basically used the following experimental procedures.  
895 Transport media such as stuart agar, cary-blair medium, and gel transport swabs with charcoal  
896 were used to transport the samples to the laboratory<sup>81,112</sup>. Cotton swabs were used to swab sample  
897 specimens, tissues, surfaces, fluids, etc. and cultured on nutrient agar, blood agar, tryptone soya  
898 agar, mannitol salt-phenol red agar, brain-heart infusion broth, Slanetz-Bartley mannitol salt agar,  
899 and Edwards agar media prior to identifying the 24-hour colonies using Gram-staining and  
900 different biochemical tests such as catalase and coagulase tests, latex coagulase test and DNase  
901 agar test. Subsequently, antimicrobial susceptibility testing (AST) using disc diffusion (Kirby-  
902 Bauer method or E-test) on Mueller Hinton agar plates and a 0.5 McFarland bacterial inoculum  
903 was performed. Antibiotics such as ampicillin (AMP), amoxicillin (AMX), amikacin (AMK),  
904 ampicillin-Sulbactam (SAM), amoxicillin-clavulanic acid (AMC), azithromycin (AZI), apramycin  
905 (APR), chloramphenicol (CHL), cefoxitin (FOX), ceftazidime (CFZ), clarithromycin (CLR),  
906 ciprofloxacin (CIP), cefuroxime (CXM), clindamycin (CLI), cephalexin(LEX), cefoperazone  
907 (CFP), cefepime (FEP), cefotaxime (CTX), ceftaroline (CPT), cephalothin (CET), cloxacillin  
908 (CLX), doxycycline (DOX), erythromycin (ERY), fusidic acid (FUS), fosfomycin (Fof),  
909 gatifloxacin (GAT), gentamicin (GEN), imipenem (IPM), kanamycin (KAN), levofloxacin (LVX),  
910 linezolid (LZD), lincomycin (LIN), meropenem (MER), mupirocin (MUP), minocycline (MIC),  
911 moxifloxacin (MXF), methicillin (MET), metronidazole (MTZ), nitrofurantoin (NIT), norfloxacin  
912 (Nor), nalidixic acid (NAL), netilmicin (NEL), oxacillin (OXA), ofloxacin (OFX), perfloxacin  
913 (PF), penicillin (PEN), pristinamycin (PRI), rifampicin (RIF), streptomycin (STR), streptogramin

914 B (SB), sulfamethoxazole (SMZ), tetracycline (TET), teicoplanin (TEC), telithromycin (TEL),  
915 tobramycin (TOB), trimethoprim-sulfamethoxazole (SXT), and vancomycin (VAN) were mostly  
916 used for the AST. Polymerase chain reaction (PCR) was used to detect the antimicrobial resistance  
917 genes and clones (i.e. molecular typing) of the isolates.

918 **Role of Funding Source:** Not applicable.

919 **Contributors:** JOS conceived, designed and supervised the study, analysed and vetted the  
920 results, wrote the paper, edited and formatted it for publication. EM co-conceived and co-  
921 designed the study, gathered and analysed the data and drafted the paper. Both authors approved  
922 the final version for submission.

923 **Funding:** None

924 **Declaration of interests:** The authors declare no conflict of interest.

925 **Acknowledgments:** None

## 926 **References**

927 1. Witte W, Cuny C, Klare I, Nübel U, Strommenger B WG. Emergence and spread of antibiotic-  
928 resistant Gram-positive bacterial pathogens. *Int J Med Microbiol* 2008; **298(5-6)**: 365–77.

929 2. Witte W. ‘Antibiotic resistance in gram-positive bacteria: epidemiological aspects.’ *J*  
930 *Antimicrob Chemother* 1999; **44, su**: 1–9.

931 3. Nelson RE, Slayton RB, Stevens VW, Jones MM, Khader K, Rubin MA, Jernigan JA SM.  
932 Attributable Mortality of Healthcare-Associated Infections Due to Multidrug-Resistant Gram-  
933 Negative Bacteria and Methicillin-Resistant Staphylococcus Aureus. *Infect Control Hosp*  
934 *Epidemiol* 2017; **38(7)**: 848–56.

- 935 4. O'Neill J. 'Tackling drug-resistant infections globally: final report and recommendations.' *Rev*  
936 *Antimicrob Resist* 2016.
- 937 5. Kluyt- mans J. EKRBKCB vanGemert-PJEHS. Methicillin-resistant *Staphylococcus aureus*  
938 (MRSA): burden of disease and control challenges in Europe. *Euro Surveill* 2010; **15**: 19688.
- 939 6. Lee B.Y, Singh A, David M.Z , Bartsch S.M, Slayton R.B, Huang S.S E. The economic  
940 burden of community associated methicillin-resistant *Staphylococcus aureus* (CA-MRSA).. *Clin*  
941 *MicrobiolInfect* 2013; **19**,: 528–536. Available at: doi: 10.1111/j.1469-0691.2012.03914.x.
- 942 7. Hidron A, Edwards J, Patel J et al. NHSN annual update: antimicrobial resistant pathogens  
943 associated with healthcare-associated infections: annual summary of data reported to the  
944 National Healthcare Safety Network at the Centers for Disease Control and Prevention, 2006–  
945 2007. *Infect Control Hosp Epidemiol* 2008; 29 2008; **29**: 996–1011.
- 946 8. Kaasch AJ, Barlow G, Edgeworth JD, Fowler VG Jr., Hellmich M, Hopkins S et al.  
947 *Staphylococcus aureus* bloodstream infection: a pooled analysis of five prospective,  
948 observational studies. *J Infect* 2014; **68(3)**: 242–51. Available at: doi: 10.1016/j.jinf.2013.10.015  
949 PMID: 24247070%0A.
- 950 9. Fortuin-de Smidt MC, Singh-Moodley A, Badat R, Quan V, Kularatne R, Nana T et al.  
951 *Staphylococcus aureus* bacteraemia in Gauteng academic hospitals, South Africa. *International*  
952 *journal of infectious diseases. Int Soc Infect Dis* 2015; 2015; **30**: 41–8.
- 953 10. Gastmeier P, Schroder C, Behnke M, Meyer E GC. Dramatic increase in vancomycin-  
954 resistant enterococci in Germany. *J Antimicrob Chemother* 2011; **69(6)**: 1660–4.
- 955 11. Lepoutre A, Doloy A, Bidet P, Leblond A, Perrocheau A, Bingen E, Trieu-Cuot P, Bouvet A,

- 956 Poyart C, Lévy-Bruhl D M of the EN. Epidemiology of invasive *Streptococcus pyogenes*  
957 infections in France in 2007. *J Clin Microbiol* 2011; **49(12)**: 4094–100.
- 958 12. Butler AM, Olsen MA, Merz LR, Guth RM, Woeltje KF, Camins BC FV. Attributable costs  
959 of enterococcal bloodstream infections in a nonsurgical hospital cohort. *Infect Control Hosp*  
960 *Epidemiol* 2010; **31(1)**: 28–35.
- 961 13. Kaye KS, Engemann JJ, Mozaffari E CY. Reference group choice and antibiotic resistance  
962 outcomes. *Emerg Infect Dis* 2004; **10(6)**: 1125–8.
- 963 14. Puchter L, Chaberny IF, Schwab F, Vonberg RP, Bange FC EE. Economic burden of  
964 nosocomial infections caused by vancomycin-resistant enterococci. *Antimicrob Resist Infect*  
965 *Control* 2018; **7(1)**: 1.
- 966 15. Carapetis JR, Steer AC, Mulholland EK WM. The global burden of group A streptococcal  
967 diseases. *Lancet Infect Dis* 2005; **5(11)**: 685–94.
- 968 16. Skoff TH, Farley MM, Petit S, Craig AS, Schaffner W G, K, Harrison LH, Lynfield R,  
969 Mohle-Boetani J, Zansky S A, BA, Stefonek K, Zell ER, Jackson D, Thompson T SS. Increasing  
970 burden of invasive group B streptococcal disease in nonpregnant adults, 1990–2007. *Clin Infect*  
971 *Dis* 2009; **49(1)**: 85–92.
- 972 17. Eskandarian N, Ismail Z, Neela V, van Belkum A, DesamN A, S N. Antimicrobial  
973 susceptibility profiles, serotype distribution and virulence determinants among invasive, non-  
974 invasive and colonizing *Streptococcus agalactiae* (group B streptococcus) from Malaysian  
975 patients. *Eur J Clin Microbiol Infect Dis* 2015; **34(3)**: 579–584.
- 976 18. Seale AC, Mwaniki M, Newton CR BJ. Maternal and early onset neonatal bacterial sepsis:

- 977 burden and strategies for prevention in sub-Saharan Africa. *Lancet Infect Dis* 2009; **9(7)**: 428–  
978 38.
- 979 19. Kuchenmüller T, Abela-Ridder B, Corrigan T TA. World Health Organization initiative to  
980 estimate the global burden of foodborne diseases. *Rev Sci Tech* 2013; **32(2)**: 459–67.
- 981 20. World Health Organization. Antimicrobial resistance—global report on surveillance.  
982 Geneva, Switzerland. *WHO* 2014.
- 983 21. Williams PC, Isaacs D BJ. Antimicrobial resistance among children in sub-Saharan Africa.  
984 *Lancet Infect Dis* 2017.
- 985 22. Liu Y-Y, Wang Y, Walsh TR, Yi LX, Zhang R, Spencer J et al. Emergence of plasmid-  
986 mediated colistin resistance mechanism MCR-1 in animals and human beings in China: a  
987 microbiological and molecular biological study. . *Lancet Infect Dis* 2016; **16**: 161–8. Available  
988 at: doi:10.1016/S1473-3099(15)00424-7.
- 989 23. World Health Organization. WHO’s first global report on antibiotic resistance reveals  
990 serious, worldwide threat to public health. In Antimicrobial resistance—global surveillance report.  
991 Virtual Press Conference 2014 Apr. *WHO* 2014; (**Vol. 30**).
- 992 24. Willems RJ, Hanage WP, Bessen DE FE. Population biology of Gram-positive pathogens:  
993 high-risk clones for dissemination of antibiotic resistance. *FEMS Microbiol Rev* 2011; **35(5)**:  
994 872–900.
- 995 25. Shen J, Wang Y SS. Presence and dissemination of the multiresistance gene cfr in Gram-  
996 positive and Gram-negative bacteria. *J Antimicrob Chemother* **68(8)**: 1697–706.
- 997 26. Lebreton F, van Schaik W, McGuire AM, Godfrey P, Griggs A, Mazumdar V, Corander J,

- 998 Cheng L, Saif S, Young S ZQ. Emergence of epidemic multidrug-resistant *Enterococcus faecium*  
999 from animal and commensal strains. *MBio* **4(4)**: e00534-13.
- 1000 27. Ateba CN, Lekoma KP KD. ‘Detection of vanA and vanB genes in vancomycin-resistant  
1001 enterococci (VRE) from groundwater using multiplex PCR analysis.’ *J Water Health* 2013; **11.4**:  
1002 684–691.
- 1003 28. Iweriebor, Benson Chuks, Sisipho Gaqavu, Larry Chikwelu Obi, Uchechukwu U. Nwodo  
1004 and AIO. ‘Antibiotic susceptibilities of *Enterococcus* species isolated from hospital and domestic  
1005 wastewater effluents in Alice, eastern Cape Province of South Africa.’ 4231-4246. *Int J Environ*  
1006 *Res Public Health* **12**, no. **4**.
- 1007 29. Akanbi OE, Njom HA, Fri J, Otigbu AC CA. Antimicrobial Susceptibility of *Staphylococcus*  
1008 *aureus* Isolated from Recreational Waters and Beach Sand in Eastern Cape Province of South  
1009 Africa. *Int J Environ Res public Heal* 2017; **1;14(9)**: 1001.
- 1010 30. Al-ashmawy MA, Sallam KI, Abd-elghany SM. Prevalence, Molecular Characterization, and  
1011 Antimicrobial Susceptibility of Methicillin-Resistant *Staphylococcus aureus* Isolated from Milk  
1012 and Dairy Products. *FOODBORNE Pathog Dis* 2016; **13**: 156–62.
- 1013 31. Iweriebor BC, Obi LC OA. Virulence and antimicrobial resistance factors of *Enterococcus*  
1014 spp. isolated from fecal samples from piggery farms in Eastern Cape, South Africa. *BMC*  
1015 *Microbiol* 2015; **15(1)**: 136.
- 1016 32. Katakweba AA, Møller KS, Muumba J, Muhairwa AP, Damborg P, Rosenkrantz JT, Minga  
1017 UM, Mtambo MM OJ. Antimicrobial resistance in faecal samples from buffalo, wildebeest and  
1018 zebra grazing together with and without cattle in Tanzania. *J Appl Microbiol* 2015; **118(4)**: 966–

- 1019 75.
- 1020 33. FDA. Antimicrobials Sold or Distributed for Use in Food-Producing Animals. Summary  
1021 Report by the Food and Drug Administration Department of Health and Human Services.  
1022 *Maryland, USA Adm* 2014.
- 1023 34. Van Boeckel TP, Brower C GM et al. Global trends in antimicrobial use in food animals.  
1024 *Proc Natl Acad Sci* 2015; **112**: 5649–54.
- 1025 35. Zhang QQ, Ying GG PC et al. Comprehensive evaluation of antibiotics emission and fate in  
1026 the river basins of China: source analysis, multimedia modeling, and linkage to bacterial  
1027 resistance. *Env Sci Technol* 2015; **49**: 67772–82.
- 1028 36. Oliver SP MS. Antimicrobial resistance of mastitis pathogens. *Vet Clin Food Anim Pract*  
1029 2012; **28(2)**: 165–85.
- 1030 37. Osei Sekyere J. Current State of Resistance to Antibiotics of Last-Resort in South Africa: a  
1031 Review From a Public Health Perspective. *Front Public Heal* 2016; **4**: 209.
- 1032 38. Osei Sekyere J. Types and selling practices of antibiotics in veterinary shops in ashanti  
1033 region, GHANA. *Int J Food, Agric Vet Sci* 2014; **4(2)**: 87–96.
- 1034 39. Osei Sekyere, John and FA. ‘Prevalence of Multidrug Resistance among Salmonella enterica  
1035 Serovar Typhimurium Isolated from Pig Faeces in Ashanti Region, Ghana.’ *Int J Antibiot* 2015.
- 1036 40. Osei Sekyere J. ‘Antibiotic types and handling practices in disease management among pig  
1037 farms in Ashanti Region, Ghana.’ *J Vet Med* 2014.
- 1038 41. Said MB, Abbassi MS, Gómez P, Ruiz-Ripa L, Sghaier S, Ibrahim C, Torres C HA.

- 1039 Staphylococcus aureus isolated from wastewater treatment plants in Tunisia: occurrence of  
1040 human and animal associated lineages. *J water Heal* 2017; **15(4)**: 638–43.
- 1041 42. Ben Said L, Klibi N, Dziri R, Borgo F, Boudabous A, Ben Slama K TC. ‘Prevalence,  
1042 antimicrobial resistance and genetic lineages of Enterococcus spp. from vegetable food, soil and  
1043 irrigation water in farm environments in Tunisia.’ *J Sci Food Agric* 2016; **96(5)**: 1627–33.
- 1044 43. Dziri R, Lozano C, Said LB, Bellaaj R, Boudabous A, Slama KB, Torres C KN. Multidrug-  
1045 resistant enterococci in the hospital environment: detection of novel vancomycin-resistant E.  
1046 faecium clone ST910. *J Infect Dev Countries* 2016; **10(08)**: 799–806.
- 1047 44. Akindolire MA, Babalola OO AC. ‘Detection of antibiotic resistant Staphylococcus aureus  
1048 from milk: A public health implication.’ *Int J Environ Res Public Health* 2015; **12**, no. **9**: 10254–  
1049 10275.
- 1050 45. Ben Said L, Dziri R, Sassi N, Lozano C, Ben Slama K, Ouzari I, Torres C KN. Species  
1051 distribution, antibiotic resistance and virulence traits in canine and feline enterococci in Tunisia.  
1052 *Acta Vet Hungarica* 2017; **65(2)**: 173–84.
- 1053 46. El-Hamid MI BM. ‘Comparative phenotypic and genotypic discrimination of methicillin  
1054 resistant and susceptible Staphylococcus aureus in Egypt.’ *Cell Mol Biol* 2015; **61**, no. **4**: 101–  
1055 112.
- 1056 47. Mariem BJ, Ito T, Zhang M, *et al.* Molecular characterization of methicillin-resistant Panton-  
1057 valentine leukocidin positive staphylococcus aureus clones disseminating in Tunisian hospitals  
1058 and in the community. *BMC* 2013; **12**: 2.
- 1059 48. Ngbede EO, Raji MA, Kwanashie CN, Kwaga JK, Adikwu AA, Maurice NA AA.



- 1060 Characterization of high level ampicillin-and aminoglycoside-resistant enterococci isolated from  
1061 non-hospital sources. *J Med Microbiol* 2017; **10;66(7)**: 1027–32.
- 1062 49. Iweriebor BC, Obi LC OA. Virulence and antimicrobial resistance factors of *Enterococcus*  
1063 spp. isolated from fecal samples from piggery farms in Eastern Cape, South Africa. *BMC*  
1064 *Microbiol* 2015; **15**: 136.
- 1065 50. Oumokhtar B, Elazhari M, Timinouni M, Bendahhou K, Bennani B, Mahmoud M, El Ouali  
1066 Lalami A, Berrada S, Arrayhani M SHT. *Staphylococcus aureus* nasal carriage in a Moroccan  
1067 dialysis center and isolates characterization. *Hemodial Int* 2013; **2**: 542–7.
- 1068 51. El Bayomi RM, Ahmed HA, Awadallah MA, Mohsen RA, Abd El-Ghafar AE AM.  
1069 Occurrence, Virulence Factors, Antimicrobial Resistance, and Genotyping of *Staphylococcus*  
1070 *aureus* Strains Isolated from Chicken Products and Humans. *VECTOR-BORNE ZOONOTIC Dis*  
1071 2016; **16**: 157–64.
- 1072 52. Hashem RA, Yassin AS, Zedan HH, Amin MA. Fluoroquinolone resistant mechanisms in  
1073 methicillin-resistant *Staphylococcus aureus* clinical isolates in Cairo , Egypt. *J Infect Dev Ctries*  
1074 2013; **7**, no. **11**: 796–803.
- 1075 53. Osei Sekyere J. Current State of Resistance to Antibiotics of Last-Resort in South Africa: a  
1076 Review From a Public Health Perspective. *Front Public Heal* 2016; **4**: 209.
- 1077 54. Alekshun MN LS. Molecular mechanisms of antibacterial multidrug resistance. *Cell* 2007;  
1078 **128(6)**: pp.1037-1050.
- 1079 55. McKeegan KS, Borges-Walmsley MI WA. Microbial and viral drug resistance mechanisms.  
1080 *Trends Microbiol* 2002; **10(10)**: s8–s14.

- 1081 56. Osei Sekyere J, Asante J. Emerging mechanisms of antimicrobial resistance in bacteria and  
1082 fungi : advances in the era of genomics. *Future Microbiol* 2018; **13**: 1–22.
- 1083 57. Malachowa N DF. ‘Mobile genetic elements of Staphylococcus aureus.’ *Cell Mol life Sci*  
1084 2010; **67.18**: 3057–3071.
- 1085 58. Roberts AP MP. ‘Tn916-like genetic elements: a diverse group of modular mobile elements  
1086 conferring antibiotic resistance.’ *FEMS Microbiol Rev* 2011; **35**, no. **5**: 856–871.
- 1087 59. Frost LS, Leplae R, Summers AO TA. ‘Mobile genetic elements: the agents of open source  
1088 evolution.’ *Nat Rev Microbiol* 2005; **3**, no. **9**: 722–732.
- 1089 60. Thomas CM NK. ‘Mechanisms of, and barriers to, horizontal gene transfer between  
1090 bacteria.’ (2005): . *Nat Rev Microbiol* 2005; **3**, no. **9**: 711–21.
- 1091 61. Smillie C, Garcillán-Barcia MP, Francia MV, Rocha EP de la CF. ‘Mobility of plasmids.’  
1092 *Microbiol Mol Biol Rev* 2010; **74**, no. **3**: 434–452.
- 1093 62. Bernabé KJ, Langendorf C, Ford N, Ronat JB MR. Antimicrobial resistance in West Africa:  
1094 a systematic review and meta-analysis. *Int J Antimicrob agents* 2017; **50(5)**: 629–39.
- 1095 63. Tadesse BT, Ashley EA, Ongarello S, *et al.* Antimicrobial resistance in Africa : a systematic  
1096 review. *BMC Infect Dis* 2017; **17:616**: 1–17.
- 1097 64. Workneh M, Katz MJ, Lamorde M, Cosgrove SE MY. Antimicrobial Resistance of Sterile  
1098 Site Infections in Sub-Saharan Africa: A Systematic Review. *Open forum Infect Dis*: ofx209).  
1099 US: Oxford University Press.
- 1100 65. Schaumburg F, Alabi AS, Peters G BK. New epidemiology of Staphylococcus aureus

- 1101 infection in Africa. *Clinical Microbiol Infect* 2014; **20(7)**: 589–96.
- 1102 66. Nejad SB, Allegranzi B, Syed SB, Ellis B PD. Health-care-associated infection in Africa: a  
1103 systematic review. *Bull World Heal Organ* 2011; **89(10)**: 757–65.
- 1104 67. Abdulgader SM, Shittu AO, Nicol MP KM. Molecular epidemiology of Methicillin-resistant  
1105 *Staphylococcus aureus* in Africa: a systematic review. *Front Microbiol* 2015; **6**: 348.
- 1106 68. Hraoui M, Boubaker IB, Rachdi M, Slim A RS. Macrolide and tetracycline resistance in  
1107 clinical strains of *Streptococcus agalactiae* isolated in Tunisia. *J Med Microbiol* 2017; **61**: 1109–  
1108 13.
- 1109 69. Hraoui M, Boubaker IB, Doloy A, Redjeb SB BA. Molecular Mechanisms of Tetracycline  
1110 and Macrolide Resistance and emm Characterization of *Streptococcus pyogenes* Isolates in  
1111 Tunisia. *Microb Drug Resist* 2011; **17(3)**: 377–82.
- 1112 70. Fischer A, Liljander A, Kaspar H, Muriuki C, Fuxelius HH, Bongcam-Rudloff E, de Villiers  
1113 EP, Huber CA, Frey J, Daubenberger C BR. Camel *Streptococcus agalactiae* populations are  
1114 associated with specific disease complexes and acquired the tetracycline resistance gene tetM via  
1115 a Tn 916 -like element Camel *Streptococcus agalactiae* populations are associated with specific  
1116 disease complex. *Vet Res* 2013, 2013; **44:86**.
- 1117 71. Elhani D, Klibi N, Dziri R, Hassan MB, Mohamed SA, Said LB, Mahjoub A, Slama KB,  
1118 Jemli B, Bellaj R BF. ‘vanA-containing *E. faecium* isolates of clonal complex CC17 in clinical  
1119 and environmental samples in a Tunisian hospital.’ *Diagn Microbiol Infect Dis* 2014; **79**, no. **1**:  
1120 60–63. Available at: <http://dx.doi.org/10.1016/j.diagmicrobio.2014.01.011>.
- 1121 72. Dziri R, Lozano C, Said LB, Bellaaj R, Boudabous A, Slama KB, Torres C KN. ‘Multidrug-

- 1122 resistant enterococci in the hospital environment: detection of novel vancomycin-resistant E.  
1123 faecium clone ST910.' *J Infect Dev Ctries* 2016; **10**, no. **8**: 799–806.
- 1124 73. Mensah SE, Koudande OD, Sanders P, Laurentie M, Mensah GA AF. Antimicrobial residues  
1125 in foods of animal origin in Africa: public health risks. *RevSciTech* 2014; **33**: ,987–996.
- 1126 74. O'Neill J. Antimicrobials in Agriculture and the Environment: Reducing Unnecessary Use  
1127 and Waste-The Review on Antimicrobial Resistance. 2015.
- 1128 75. da Costa PM, Loureiro L MA. Transfer of multi-drug resistant bacteria between intermingled  
1129 ecological niches: the interface between humans, animals and the environment. *Int J Environ Res*  
1130 *Public Health* 2013; **10**,: 278–294. Available at: .doi:10.3390/ijerph10010278.
- 1131 76. Holmes AH, Moore LS, Sundsfjord A, Steinbakk M, Regmi S, Karkey A, Guerin PJ PL.  
1132 Understanding the mechanisms and drivers of antimicrobial resistance. *Lancet* 2016; **387**,: 176–  
1133 187. Available at: doi:10.1016/S0140-6736(15)00473-0.
- 1134 77. Hueston W, Appert J, Denny T, King L, Umber J VL. Assessing global adoption of one  
1135 health approaches. *Ecohealth* 2013; **10**: 228–33. Available at: doi:10.1007/%0As10393-013-  
1136 0851-5.
- 1137 78. Parmley J, Leung Z, Léger D, Finley R, Irwin R, Pintar K, Pollari F, Reid-Smith R, Waltner-  
1138 Toews D, Karmali M ER. One health and food safety- The Canadian experience: a holistic  
1139 approach toward enteric bacterial pathogens and antimicrobial resistance surveillance. In:  
1140 Institute of Medicine (US). Improving Food Safety through a One Health Approach: Workshop  
1141 Summary. *Natl Acad Press Washington, DC, USA* 2012.
- 1142 79. Djoudi F, Benallaoua S, Aleo A, Touati A, Challal M, Bonura C MC. Descriptive

- 1143 Epidemiology of Nasal Carriage of Staphylococcus aureus and Methicillin-Resistant  
1144 Staphylococcus aureus Among Patients Admitted at Two Healthcare Facilities in Algeria.  
1145 *Microb Drug Resist* 2014; **21(2)**: 218–23.
- 1146 80. van Rensburg MJ, Whitelaw AC EB. Genetic basis of rifampicin resistance in methicillin-  
1147 resistant Staphylococcus aureus suggests clonal expansion in hospitals in Cape. *BMC Microbiol*  
1148 2012; **12**: 46.
- 1149 81. Boeck H De, Vandendriessche S, Hallin M, Batoko B, Alworonga J. Staphylococcus aureus  
1150 nasal carriage among healthcare workers in Kisangani , the Democratic Republic of the Congo.  
1151 *Eur J Clin Microbiol Infect Dis* 2015; **34(8)**: 1567–72.
- 1152 82. Fall C, Seck A, Richard V, Ndour M, Sembene M, Laurent F BS. Epidemiology of  
1153 Staphylococcus aureus in Pigs and Farmers in the Largest Farm in Dakar , Senegal. *FOOD*  
1154 *BORNE Pathog Dis* 2012; **9**: 962–5.
- 1155 83. Stefani S, Chung DR, Lindsay JA, Friedrich AW, Kearns AM, Westh H MF. ‘Meticillin-  
1156 resistant Staphylococcus aureus (MRSA): global epidemiology and harmonisation of typing  
1157 methods.’ *Int J Antimicrob Agents* 2012; **39**, no. **4**: 273–282.
- 1158 84. Song JH, Hsueh PR, Chung DR, Ko KS, Kang CI, Peck KR et al. Spread of methicillin-  
1159 resistant Staphylococcus aureus between the community and the hospitals in Asian. *J Antimicrob*  
1160 *Chemother* 2011 2011; **66**: 1061–9.
- 1161 85. Lochan H, Moodley C, Rip D, Bamford C, Hendricks M, Davidson A EB. ‘Emergence of  
1162 vancomycin-resistant Enterococcus at a tertiary paediatric hospital in South Africa.’ *SAMJ South*  
1163 *African Med J* 2016; **106**, no. **6**: 562–566.

- 1164 86. Udo EE, Pearman JW GW. Genetic analysis of community isolates of methicillin-resistant  
1165 *Staphylococcus aureus* in Western Australia. *J Hosp Infect* 1993; **25**: 97–108.
- 1166 87. Salgado CD, Farr BM CD. Community-acquired methicillin-resistant *Staphylococcus aureus*:  
1167 a meta-analysis of prevalence and risk factors. *Clin Infect Dis* 2003, 36 2003; **36**: 131–139.
- 1168 88. Hiramatsu K, Okuma K, Ma XX, Yamamoto M, Hori S et al: New trends in *Staphylococcus*  
1169 *aureus* infections: glycopeptide resistance in hospital and methicillin resistance in the  
1170 community. *Curr Opin Infect Dis* 2002, 15 2002; **15**: 407–413.
- 1171 89. Chambers H. The changing epidemiology of *Staphylococcus aureus*? *Emerg Infect Dis* 2001;  
1172 **7**: 178–182.
- 1173 90. Diekema DJ, Pfaller MA, Schmitz FJ, Smayevsky J, Bell J et al. Survey of infections due to  
1174 *Staphylococcus* species: frequency of occurrence and antimicrobial susceptibility of isolates  
1175 collected in the United States, Canada, Latin America, Europe, and the Western Pacific region  
1176 for the SENTRY Antimicrobial Surveillanc. *Clin Infect Dis* 2001; **32 Suppl 2**: S114–132.
- 1177 91. NNIS. National Nosocomial Infections Surveillance (NNIS) System Report, data summary  
1178 from January 1992 through June 2004. *Am J Infect Control* 2004; **2**: 470–485.
- 1179 92. Katayama Y, Ito T HK. A new class of genetic element, staphylococcus cassette  
1180 chromosome mec, encodes methicillin resistance in *Staphylococcus aureus*. *Antimicrob agents*  
1181 *Chemother* 2000; **44(6)**: 1549–55.
- 1182 93. Akinkunmi E LA. Species distribution and antibiotic resistance in coagulase-negative  
1183 staphylococci colonizing the gastrointestinal tract of children in Ile-Ife, Nigeria. *Trop J Pharm*  
1184 *Res* 2010; **9(1)**: 35–43.

- 1185 94. Archer GL CM. Antimicrobial susceptibility of coagulase-negative staphylococci.  
1186 *Antimicrob Agents Chemother* 1994; **38**: 2231–2237.
- 1187 95. Hashem YA, Yassin AS AM. Molecular characterization of Enterococcus spp. clinical  
1188 isolates from Cairo, Egypt. *Indian J Med Microbiol* 2015; **33(5)**: p.80.
- 1189 96. Rachdi M, Boubaker IB, Moalla S, *et al*. Phenotypic and genotypic characterization of  
1190 macrolide resistant Streptococcus pneumoniae in Tunisia ´ risation phe ´ notypique et ge ´  
1191 notypique des souches Caracte ´ es en Tunisie de Streptococcus pneumoniae isole. 2008; **56**:  
1192 125–9.
- 1193 97. Wolter N, Gottberg A Von, Gouveia L De, Klugman KP. Molecular basis and clonal nature  
1194 of increasing pneumococcal macrolide resistance in South Africa , 2000 – 2005. *Int J Antimicrob*  
1195 *Agents* 2008; **32**: 2000–5.
- 1196 98. Hancock RE. Mechanisms of action of newer antibiotics for Gram-positive pathogens.  
1197 *Lancet Infect Dis* 2005; **5**: 209–18.
- 1198 99. WHO. Tackling Antibiotic Resistance from a Food Safety Perspective in Europe. *WHO-*  
1199 *Europe, Denmark* 2011: 1–88.
- 1200 100. Cavaco LM AF. ‘Resistance in bacteria of the food chain: epidemiology and control  
1201 strategies.’ *Microb Drug Resist Futur Med Ltd, Brastislava, Slovakia* 2013: 136–158.
- 1202 101. Ouchenane Z, Agabou A, Smati F, Rolain JM RD. Staphylococcal cassette chromosome  
1203 mec characterization of methicillin-resistant Staphylococcus aureus strains isolated at the  
1204 military hospital of Constantine / Algeria ´ risation des cassettes chromosomiques mec  
1205 staphylococciques des souches Caracte ´ l. *Pathol Biol* 2013; **61**: 280–1.

- 1206 102. Omuse G, Zyl KN Van, Hoek K, Abdulgader S, Kariuki S, Whitelaw A. Molecular  
1207 characterization of *Staphylococcus aureus* isolates from various healthcare institutions in Nairobi  
1208 , Kenya : a cross sectional study. *Ann Clin Microbiol Antimicrob* 2016; **15:51**: 1–9.
- 1209 103. Perovic O, Iyaloo S, Kularatne R, Lowman W. Prevalence and Trends of *Staphylococcus*  
1210 *aureus* Bacteraemia in Hospitalized Patients in South Africa , 2010 to 2012 : Laboratory- Based  
1211 Surveillance Mapping of Antimicrobial Resistance and Molecular Epidemiology. *PLoS One*  
1212 2015: 1–14.
- 1213 104. Stokes HW GM. ‘Gene flow, mobile genetic elements and the recruitment of antibiotic  
1214 resistance genes into Gram-negative pathogens.’ *FEMS Microbiol Rev* 2011; **35**, no. **5**: 790–819.
- 1215 105. Gogarten JP TJ. ‘Horizontal gene transfer, genome innovation and evolution.’ *Nat Rev*  
1216 *Microbiol* 2005; **3**, no. **9**: 679–687.
- 1217 106. Bouchami O, Hassen AB, De Lencastre H MM. High prevalence of *mec* complex C and  
1218 *ccrC* is independent of SCC *mec* type V in *Staphylococcus haemolyticus*. *Eur J Clin Microbiol*  
1219 *Infect Dis* 2012; **31**: 605–14.
- 1220 107. Gharsa H, Slama KB, Lozano C, Gómez-Sanz E, Klibi N, Sallem RB, Gómez P, Zarazaga  
1221 M, Boudabous A TC. Prevalence, antibiotic resistance, virulence traits and genetic lineages of  
1222 *Staphylococcus aureus* in healthy sheep in Tunisia. *Veterinary microbiol. Vet Microbiol* 2012;  
1223 **156(3)**: pp.367-373.
- 1224 108. Bergal A, Loucif L, Benouareth DE, Bentorki AA, Abat C RJ. Molecular epidemiology and  
1225 distribution of serotypes, genotypes, and antibiotic resistance genes of *Streptococcus agalactiae*  
1226 clinical isolates from Guelma, Algeria and Marseille, France. *European Journal of Clinical*



- 1227 Microbiology & Infectious Disease. *Eur J Clin Microbiol Infect Dis* 2015; **34**, no. **12**: 2339–48.
- 1228 109. Djahmi N, Boutet-Dubois A, Nedjai S, Dekhil M, Sotto A LJ. Molecular epidemiology of  
1229 *Enterococcus* sp . isolated in a university hospital in Algeria. *Scand J Infect Dis* 2012; **2011**:  
1230 656–62.
- 1231 110. Conceição T, Coelho C, de Lencastre H A-SM. Frequent occurrence of oxacillin-susceptible  
1232 *mecA* -positive *Staphylococcus aureus* (OS-MRSA) strains in two African countries ´. *J*  
1233 *Antimicrob Chemother* 2015; 2015; **70**: 3200–4.
- 1234 111. Elhani D, Gharsa H, Kalai D, Lozano C, Gómez P, Boutheina J, Aouni M, Barguelli F,  
1235 Torres C SK. ‘Clonal lineages detected amongst tetracycline-resistant methicillin-resistant  
1236 *Staphylococcus aureus* isolates of a Tunisian hospital, with detection of lineage ST398.’ *J Med*  
1237 *Microbiol* 2015; **64**, no. **6**: 623–629.
- 1238 112. Abdel-moein KA, El-Hariri M SA. Methicillin-Resistant *Staphylococcus aureus* : An  
1239 Emerging Pathogen of Pets in Egypt with a Public Health Burden. *Transbound Emerg Dis* 2012;  
1240 **59**: 331–5.
- 1241 113. Fowoyo PT, Ogunbanwo ST. Antimicrobial resistance in coagulase - negative staphylococci  
1242 from Nigerian traditional fermented foods. *Ann Clin Microbiol Antimicrob* 2017; **16:4**: 1–7.
- 1243 114. Nurjadi D, Olalekan AO, Layer F, Shittu AO, Alabi A, Ghebremedhin B, Schaumburg F,  
1244 Hofmann-Eifler J, Van Genderen PJ, Caumes E FR. Emergence of trimethoprim resistance gene  
1245 *dfrG* in *Staphylococcus aureus* causing human infection and colonization in sub-Saharan Africa  
1246 and its import to Europe. *J Antimicrob Chemother* 2014; **27**: 2361–8.
- 1247 115. O’Malley SM, Emele FE, Nwaokorie FO, Idika N, Umeizudike AK, Emeka-Nwabunnia I,

- 1248 Hanson BM, Nair R, Wardyn SE ST. Molecular typing of antibiotic-resistant *Staphylococcus*  
1249 *aureus* in Nigeria. *J Infect Public Health* 2015; **8**: 187–93. Available at:  
1250 <http://dx.doi.org/10.1016/j.jiph.2014.08.001>.
- 1251 116. Shittu A, Oyedara O, Abegunrin F, Okon K, Raji A, Taiwo S, Ogunsola F, Onyedibe K EG.  
1252 Characterization of methicillin-susceptible and -resistant staphylococci in the clinical setting : a  
1253 multicentre study in Nigeria. *BMC Infect Dis* 2012; **12(1)**: 286.
- 1254 117. Vitali LA, Petrelli D, Lamikanra A, Prenna M, Akinkunmi EO. Diversity of antibiotic  
1255 resistance genes and staphylococcal cassette chromosome mec elements in faecal isolates of  
1256 coagulase-negative staphylococci from Nigeria. *BMC Microbiol* 2014; **14**:106.
- 1257 118. Adegoke AA, Okoh AI. Species diversity and antibiotic resistance properties of  
1258 *Staphylococcus* of farm animal origin in Nkonkobe Municipality , South Africa. *FoliaMicrobiol*  
1259 2014; **59**: 133–40.
- 1260 119. Khalil W, Hashwa F, Shihabi A TS. Methicillin-resistant *Staphylococcus aureus* ST80-IV  
1261 clone in children from Jordan.. *Diagn Microbiol Infect Dis* 2012; **73**: 228–230.
- 1262 120. Udo EE SE. The dissemination of ST80-SCCmec-IV community-associated methicillin  
1263 resistant *Staphylococcus aureus* clone in Kuwait hospitals. *Ann Clin Microbiol Antimicrob* 2010;  
1264 **9**: 1–7.
- 1265 121. Ahmed EF, Gad GF, Abdalla AM, Hasaneen AM AS. Prevalence of Methicillin Resistant  
1266 *Staphylococcus aureus* among Egyptian Patients after Surgical interventions. *Surg Infect*  
1267 (*Larchmt*) 2014; **15**: 404–11.
- 1268 122. Osman K, Alvarez-Ordóñez A, Ruiz L, Badr J, ElHofy F, Al-Maary KS, Moussa IM,

- 1269 Hessain AM, Orabi A, Saad A EM. Antimicrobial resistance and virulence characterization of  
1270 *Staphylococcus aureus* and coagulase-negative staphylococci from imported beef meat. *Ann Clin*  
1271 *Microbiol Antimicrob* 2017; **16(1)**: 35.
- 1272 123. Perveen I, Majid A, Knawal S, Naz I, Sehar S, Ahmed S RM. Biochemical characters and  
1273 antibiotic susceptibility of *S. aureus* isolates. *Asian Pac J Trop Biomed* 2011; **1**: 212–216.
- 1274 124. Perveen, I., Majid, A., Knawal, S., Naz, I., Sehar, S. A, S. and Raza MA. Prevalence and  
1275 antimicrobial susceptibility pattern of methicillin-resistant *Staphylococcus aureus* and  
1276 coagulasenegative staphylococci in Rawalpindi, Pakistan. *Br J Med Med Res* 2013; **3**: 198–209.  
1277 Available at: doi: 10.9734/%0ABJMMR/2013/2109.
- 1278 125. Dziri R, Klibi N, Lozano C, *et al.* High prevalence of *Staphylococcus haemolyticus* and  
1279 *Staphylococcus sapro-phyticus* in environmental samples of a Tunisian hospital. *Diagn*  
1280 *Microbiol Infect Dis* 2016; **85.2**: 136–140. Available at:  
1281 <http://dx.doi.org/10.1016/j.diagmicrobio.2016.03.006>.
- 1282 126. Stoll BJ, Hansen N, Fanaroff AA, Wright LL, Carlo WA ER, Lemons JA, Donovan EF,  
1283 Stark AR, Tyson JE, Oh W BC, Korones SB, Shankaran S, Laptook AR, Stevenson DK, Papile  
1284 LA P, WK. Late-onset sepsis in very low birth weight neonates: the experience of the NICHD  
1285 Neonatal Research Network. *J Pediatr* 2002; **110**: 285–291.
- 1286 127. Cui S, Li J, Hu C, Jin S, Li F, Guo Y, Ran LU MY. Isolation and characterization of  
1287 methicillin-resistant *Staphylococcus aureus* from swine and workers in China. *J Antimicrob*  
1288 *Chemother* 2009; **64**: 680–683.
- 1289 128. Jiménez JN, Vélez LA, Mediavilla JR, Ocampo AM, Vanegas JM, Rodríguez EA,

- 1290 Kreiswirth BN CM. Livestock-associated methicillin-susceptible *Staphylococcus aureus* ST398  
1291 infection in woman, Colombia. *Emerg Infect Dis* 2011; **17**: 1970–1971.
- 1292 129. Khanna T, Friendship R, Dewey C WJ. Methicillin resistant *Staphylococcus aureus*  
1293 colonization in pigs and pig farmers. *Vet Microbiol* 2008; **128**: 298–303.
- 1294 130. Smith TC, Male MJ, Harper AL, Kroeger JS, Tinkler GP, Moritz ED, Capuano AW,  
1295 Herwaldt LA DD. Methicillin-resistant *Staphylococcus aureus* (MRSA) strain ST398 is present  
1296 in midwestern U.S. swine and swine workers. *PLoS One* 2009; **4**: e4258.
- 1297 131. Maalej SM, Malbruny B, Leclercq R HA. Emergence of *Staphylococcus aureus* strains  
1298 resistant to pristinamycin in Sfax ( Tunisia ). *Pathol Biol* 2012; **60**: e71–4. Available at:  
1299 <http://dx.doi.org/10.1016/j.patbio.2011.10.012>.
- 1300 132. Bouchami O, Hassen AB, De Lencastre H MM. High prevalence of mec complex C and  
1301 ccrC is independent of SCCmec type V in *Staphylococcus haemolyticus*. *Eur J Clin Microbiol*  
1302 *Infect Dis* 2012; **31(4)**: 605–614.
- 1303 133. Tabe Y, Nakamura A, Oguri T IJ. Molecular characterization of epidemic multiresistant  
1304 *Staphylococcus haemolyticus* isolates. *Diagn Microbiol Infect Dis* 1998; **32**: 177–183.
- 1305 134. Santos Sanches I, Mato R, de Lencastre H, Tomasz A C, Collaborators C and the I. Patterns  
1306 of multidrug resistance among methicillin-resistant hospital isolates of coagulase-positive and  
1307 coagulase-negative staphylococci collected in the international multicenter study RESIST in  
1308 1997 and 1998. *Microb Drug Resist* 2000; **6**: 199–211.
- 1309 135. Al-haddad OH, Zorgani A GK. Nasal Carriage of Multi-Drug Resistant Panton-Valentine  
1310 Leucocidin-Positive Methicillin-Resistant *Staphylococcus aureus* in Children in Tripoli-Libya.

- 1311 2014; **90**: 724–7.
- 1312 136. Egyir B, Guardabassi L, Sørum M, Nielsen SS, Kolekang A, Frimpong E, Addo KK,  
1313 Newman MJ LA. Molecular epidemiology and antimicrobial susceptibility of clinical  
1314 *Staphylococcus aureus* from healthcare institutions in Ghana. *PLoS One*, 2014; **9(2)**: p.e89716.
- 1315 137. Egyir B, Guardabassi L, Monecke S, Kwasi K, Jemima M, Rhod A. Resistance Methicillin-  
1316 resistant *Staphylococcus aureus* strains from Ghana include USA300. *J Glob Antimicrob Resist*  
1317 2015; **3**: 26–30. Available at: <http://dx.doi.org/10.1016/j.jgar.2014.11.006>.
- 1318 138. Bouchami O, Ben Hassen A, de Lencastre H MM. High prevalence of mec complex C and  
1319 ccrC is independent of SCCmec type V in *Staphylococcus haemolyticus*. *Eur J Clin Microbiol*  
1320 *Infect Dis* 2012; **31(4)**: 605–614.
- 1321 139. Shittu A, Oyedara O, Abegunrin F, Okon K, Raji A, Taiwo S, Ogunsola F, Onyedibe K EG.  
1322 ‘Characterization of methicillin-susceptible and-resistant staphylococci in the clinical setting: a  
1323 multicentre study in Nigeria.’ *BMC Infect Dis* **12**, no. **1**: 286.
- 1324 140. Naber KG, Schito G, Botto H, Palou J MT. Surveillance Study in Europe and Brazil on  
1325 Clinical Aspects and Antimicrobial Resistance Epidemiology in Females with Cystitis (ARESC):  
1326 Implications for Empiric Therapy. *Eur Urol* 2008; **54**: 1164–1178. Available at: doi:  
1327 10.1016/j.eururo.2008.05.010 PMID: 18511178.
- 1328 141. Conceição T, Coelho C, Silva IS, de Lencastre H A-SM. *Staphylococcus aureus* in former  
1329 Portuguese colonies from Africa and the Far East: missing data to help fill the world map. *Clin*  
1330 *Microbiol Infect* 2015; **21(9)**: 842–e1.
- 1331 142. Jensen SO LB. Genetics of antimicrobial resistance in *Staphylococcus aureus*. *Futur*

- 1332 *Microbiol* 2009; **4**: 565–82.
- 1333 143. Frey KM, Lombardo MN, Wright DL AA. Towards the understanding of resistance  
1334 mechanisms in clinically isolated trimethoprim-resistant, methicillin-resistant *Staphylococcus*  
1335 *aureus* dihydrofolate reductase. *J Struct Biol* 2010; **170**: 93–7.
- 1336 144. Kadlec K, Fessler AT, Hauschild T SS. Novel and uncommon antimicrobial resistance  
1337 genes in livestock-associated methicillin-resistant *Staphylococcus aureus*. *Clin Microbiol Infect*  
1338 2012; **18**: 745–55.
- 1339 145. Badri M, Ehrlich R, Wood R MG. Initiating co-trimoxazole prophylaxis in HIV-infected  
1340 patients in Africa: an evaluation of the provisional WHO/UNAIDS recommendations. . *AIDS*  
1341 2001; **15(9)**: 1143–8.
- 1342 146. Phaku P, Lebughe M, Strauß L, *et al.* Unveiling the molecular basis of antimicrobial  
1343 resistance in *Staphylococcus aureus* from the Democratic Republic of the Congo using whole  
1344 genome sequencing. *Clin Microbiol Infect* 2016. Available at:  
1345 <http://dx.doi.org/10.1016/j.cmi.2016.04.009>.
- 1346 147. Vandendriessche S, De Boeck H, Deplano A, Phoba MF, Lunguya O, Falay D, Daully N,  
1347 Verhaegen J, Denis O JJ. Characterisation of *Staphylococcus aureus* isolates from bloodstream  
1348 infections, Democratic Republic of the Congo. *Eur J Clin Microbiol Infect Dis* 2017; **36(7)**:  
1349 1163–71.
- 1350 148. Asimwe BB, Baldan R, Trovato A CD. Prevalence and molecular characteristics of  
1351 *Staphylococcus aureus*, including methicillin resistant strains, isolated from bulk can milk and  
1352 raw milk products in pastoral communities of South-West Uganda. *BMC Infect Dis* 2017; **17(1)**:

- 1353 422.
- 1354 149. Seni J, Bwanga F, Najjuka CF, Makobore P, Okee M, Mshana SE, Kidenya BR, Joloba ML  
1355 KD. Molecular Characterization of Staphylococcus aureus from Patients with Surgical Site  
1356 Infections at Mulago Hospital in Kampala , Uganda. 2013; **8**: 1–7.
- 1357 150. Conceição T, Coelho C, Santos-Silva I, de Lencastre H A-SM. Epidemiology of methicillin-  
1358 resistant and-susceptible Staphylococcus aureus in Luanda, Angola: first description of the  
1359 spread of the MRSA ST5-IVa clone in the African continent. *Microb Drug Resist* 2014; **20(5)**:  
1360 441–9.
- 1361 151. Conceição T, Coelho C, de Lencastre H A-SM. Frequent occurrence of oxacillin-susceptible  
1362 mecA-positive Staphylococcus aureus (OS-MRSA) strains in two African countries. *J*  
1363 *Antimicrob Chemother* 2015; **70(12)**: 3200–4.
- 1364 152. Hososaka Y, Hanaki H EH et al. Characterization of oxacillinsusceptible mecA-positive  
1365 Staphylococcus aureus: a new type of MRSA. *J Infect Chemother* 2007; **13**: 79–86.
- 1366 153. Petinaki E, Kontos F MA. Emergence of two oxacillin-susceptible mecA-positive  
1367 Staphylococcus aureus clones in a Greek hospital. *J Antimicrob Chemother* 2002; **50**: 1090–1.
- 1368 154. Pu W, Su Y LJ et al. High incidence of oxacillin-susceptible mecA-positive Staphylococcus  
1369 aureus (OS-MRSA) associated with bovine mastitis in China. *PLoS One* 2014; **9**: e88134.
- 1370 155. Corrente M, Normanno G, Martella V, Bellacicco AL, Quaglia NC, Dambrosio A,  
1371 Buonavoglia D, D’Abramo M BC. Comparison of methods for the detection of methicillin  
1372 resistance in Staphylococcus aureus isolates from food products. *Lett Appl Microbiol* 2007; **45**:  
1373 535–9.

- 1374 156. Meeren BT, Millard PS, Scacchetti M, Hermans MH, Hilbink M, Concelho TB, Ferro JJ  
1375 WP. Emergence of methicillin resistance and Panton-Valentine leukocidin positivity in hospital-  
1376 and community-acquired *Staphylococcus aureus* infections in Beira , Mozambique. *Trop Med Int*  
1377 *Heal Vol* 2013; **0**.
- 1378 157. De Angelis G, Cipriani M, Cauda R TE. Treatment of skin and soft tissue infections due to  
1379 community-associated methicillin-resistant *Staphylococcus aureus* in Europe: the role of  
1380 trimethoprim-sulfamethoxazole. *Clin Infect Dis author reply* 2 2011; **52**: 1471–2.
- 1381 158. Chua K, Laurent F CG et al. Antimicrobial resistance: not community-associated  
1382 methicillin-resistant *Staphylococcus aureus* (CA-MRSA)! A clinician’s guide to community  
1383 MRSA—its evolving antimicrobial resistance and implications for therapy. *Clin Infect Dis* 2011;  
1384 **52**: 99–114.
- 1385 159. Marais E, Aithma N, Perovic O, Oosthuysen WF, Musenge E DA. Antimicrobial  
1386 susceptibility of methicillin-resistant *Staphylococcus aureus* isolates from South Africa. . *SAMJ*  
1387 2009; **99**: 170–3.
- 1388 160. Shittu AO LJ. Antimicrobial susceptibility patterns and characterization of clinical isolates  
1389 of *Staphylococcus aureus* in KwaZulu-Natal province, South Africa. *BMC Infect Dis* 2006; **6**:  
1390 125.
- 1391 161. Wichelhaus TA, Schafer V, Brade V BB. Molecular characterization of *rpoB* mutations  
1392 conferring cross-resistance to rifamycins on methicillin-resistant *Staphylococcus aureus*.  
1393 *Antimicrob Agents Chemother* 1999; **43**: 2813–2816.
- 1394 162. Perovic O, Singh-Moodley A, Govender NP, Kularatne R, Whitelaw A, Chibabhai V,



- 1395 Naicker P, Mbelle N, Lekalakala R, Quan V SC. A small proportion of community-associated  
1396 methicillin-resistant *Staphylococcus aureus* bacteraemia, compared to healthcare-associated  
1397 cases, in two South African provinces. *Eur J Clin Microbiol Infect Dis* 2017; **36(12)**: 2519–32.
- 1398 163. Amoako DG, Bester LA, Somboro AM, Baijnath S, Govind CN, Essack SY. Plasmid-  
1399 mediated resistance and virulence mechanisms in the private health sector in KwaZulu-Natal ,  
1400 South Africa : An investigation of methicillin resistant *Staphylococcus aureus* ( MRSA ) clinical  
1401 isolates col. *Int J Infect Dis* 2016; **46**: 38–41.
- 1402 164. Sit PS, Teh CS, Idris N, Sam IC, Syed Omar SF SH, Thong KL, Kamarulzaman A PS.  
1403 Prevalence of methicillin-resistant *Staphylococcus aureus* (MRSA) infection and the molecular  
1404 characteristics of MRSA bacteraemia over a two-year period in a tertiary teaching hospital in  
1405 Malaysia. *BMC Infect Dis* 2017; **17**: 274.
- 1406 165. Antiabong JF, Kock MM, Bellea NM EM. Diversity of Multidrug Efflux Genes and  
1407 Phenotypic Evaluation of the In vitro Resistance Dynamics of Clinical *Staphylococcus Aureus*  
1408 Isolates Using Methicillin; a Model  $\beta$ -lactam. *open Microbiol journal* 2017; **11**: 132–41.
- 1409 166. Conceição T, Santos Silva I, de Lencastre H A-SM. *Staphylococcus aureus* nasal carriage  
1410 among patients and health care workers in Sao Tome and Principe. *Microb Drug Resist* 2014;  
1411 **20(1)**: 57–66.
- 1412 167. Sadowy E, Matynia B HW. Population structure, virulence factors and resistance  
1413 determinants of invasive, noninvasive and colonizing *Streptococcus agalactiae* in Poland. *J*  
1414 *Antimicrob Chemother* 2010; **65(9)**: 1907–1914.
- 1415 168. Bohnsack JF, Whiting A, GottschalkM, DunnDM, Weiss R A, PH, Philips JB 3rd, Weisman

- 1416 LE, Rhoads GG LF. Population structure of invasive and colonizing strains of *Streptococcus*  
1417 *agalactiae* from neonates of six U.S. Academic Centers from 1995 to 1999. *J Clin Microbiol*  
1418 2010; **46(4)**: 1285–1291.
- 1419 169. Shabayek S, Abdalla S. Macrolide- and tetracycline-resistance determinants of colonizing  
1420 group B streptococcus in women in Egypt. *J Med Microbiol* 2014; **63**: 1324–7.
- 1421 170. Verani, J. R., McGee, L., Schrag SJ. Prevention of perinatal group B streptococcal  
1422 disease— revised guidelines from CDC, 2010. *MMWR Recomm Rep* 2010; **59 (RR-10)**: 1–36.
- 1423 171. Rachdi M, Boubaker IB, Hraoui M RS. High rates of macrolide resistance among clinical  
1424 isolates of *Streptococcus agalactiae* in Tunisia. *Arch Inst Pasteur Tunis* 2010; **87(1/2)**: p.35.
- 1425 172. Hraoui M, Boubaker IB, Doloy A, Redjeb SB BA. ‘Molecular mechanisms of tetracycline  
1426 and macrolide resistance and emm characterization of *Streptococcus pyogenes* isolates in  
1427 Tunisia.’ *Microb Drug Resist* 2011; **17**, no. **3**: 377–382.
- 1428 173. Ksia S, Smaoui H, Hariga D KA. Biotypes and antimicrobial susceptibility of *Streptococcus*  
1429 *pyogenes* strains isolated in children in Tunis. *Bull la Société Pathol Exot* 2010; **103(2)**: pp.69-  
1430 74.
- 1431 174. Fischer A, Liljander A, Kaspar H, Muriuki C, Fuxelius HH, Bongcam-Rudloff E, de  
1432 Villiers EP, Huber CA, Frey J, Daubenberger C BR. ‘Camel *Streptococcus agalactiae*  
1433 populations are associated with specific disease complexes and acquired the tetracycline  
1434 resistance gene tetM via a Tn 916-like element.’ *Vet Res* 2013; **44**, no. **1**: 86.
- 1435 175. Bolukaoto JY, Monyama CM, Chukwu MO, Lekala SM, Nchabeleng M, Maloba MR,  
1436 Mavenyengwa RT, Lebelo SL, Monokoane ST, Tshepuwane C MS. Antibiotic resistance of

- 1437 Streptococcus agalactiae isolated from pregnant women in Garankuwa , South Africa. *BMC Res*  
1438 *Notes* 2015: 6–12.
- 1439 176. Djahmi N, Boutet-Dubois A, Nedjai S, Dekhil M, Sotto A LJ. Molecular epidemiology of  
1440 Enterococcus sp. isolated in a university hospital in Algeria. *Scand J Infect Dis* 2012; **44(9)**,:  
1441 pp.656-662.
- 1442 177. Matsushima A, Takakura S, Yamamoto M, Matsumura Y, Shirano M, Nagao M, Ito Y,  
1443 Iinuma Y, Shimizu T, Fujita N IS. Regional spread and control of vancomycin-resistant  
1444 Enterococcus faecium and Enterococcus faecalis in Kyoto, Japan. *Eur J Clin Microbiol Infect*  
1445 *Dis* 2011.
- 1446 178. Fallico L, Boldrin C, Grossato A, Franchin E DCE, Tommasini T et al. Molecular  
1447 epidemiology of Enterococcus faecium isolates from an Italian hospital. *Infection* 2011; **39**: 127  
1448 – 33.
- 1449 179. Hsieh YC, Lee WS, Ou TY HP. Clonal spread of CC17 vancomycin-resistant Enterococcus  
1450 faecium with multilocus sequence type 78 (ST78) and a novel ST444 in Taiwan. *Eur J Clin*  
1451 *Microbiol Infect Dis* 2010; **29**: 25 – 30.
- 1452 180. Mardassi, Boutheina Ben Abdelmoumen, Nadhem Aissani, Imed Moalla, Douaa Dhahri,  
1453 Abir Dridi and BM. ‘Evidence for the predominance of a single tet (M) gene sequence type in  
1454 tetracycline-resistant Ureaplasma parvum and Mycoplasma hominis isolates from Tunisian  
1455 patients.’ *J Med Microbiol* 2012; **61**, no. **9**: 1254–61.
- 1456 181. Said LB, Klibi N, Lozano C, Dziri R, Slama KB, Boudabous A TC. ‘Diversity of  
1457 enterococcal species and characterization of high-level aminoglycoside resistant enterococci of

- 1458 samples of wastewater and surface water in Tunisia.’ . *Sci Total Environ* 2015; **530**: 11–7.
- 1459 182. Klibi N, Lagha AB, Slama KB, Boudabous A TC. ‘Faecal enterococci from camels in  
1460 Tunisia: species, antibiotic resistance and virulent genes.’ *Vet Rec* 2013; **172**, : 213–213.
- 1461 183. Klibi N, Said LB, Jouini A, Slama KB, López M, Sallem RB, Boudabous A TC. ‘Species  
1462 distribution, antibiotic resistance and virulence traits in enterococci from meat in Tunisia.’  
1463 (2013): . *Meat Sci* 2013; **93**, no. **3**: 675–80.
- 1464 184. Iweriebor, Benson C., Larry C. Obi and AIO. ‘Virulence and antimicrobial resistance  
1465 factors of *Enterococcus* spp. isolated from fecal samples from piggery farms in Eastern Cape,  
1466 South Africa.’ *BMC Microbiol* **15**, no. **1**: 136.
- 1467 185. Al-haddad OH, Zorgani A GK. Nasal Carriage of Multi-Drug Resistant Panton-Valentine  
1468 Leucocidin-Positive Methicillin-Resistant *Staphylococcus aureus* in Children in Tripoli-Libya.  
1469 *Am J Trop Med Hyg* 2014; **90**: 724–7.
- 1470 186. Ayepola OO, Olasupo NA, Egwari LO, Becker K. Molecular Characterization and  
1471 Antimicrobial Susceptibility of *Staphylococcus aureus* Isolates from Clinical Infection and  
1472 Asymptomatic Carriers in Southwest Nigeria. *PLoS One* 2015; **2304**: 4–11. Available at:  
1473 <http://dx.doi.org/10.1371/journal.pone.0137531>.
- 1474 187. Mbelle NM, Maningi NE, Tshisevhe V, Modipane L, Amoako DG SJ. First Report of a  
1475 Whole-Genome Shotgun Sequence of a Clinical *Enterococcus faecalis* Sequence Type 6 Strain  
1476 from South Africa. *Genome Announc* 2017; **5(50)**: e01382-17.
- 1477 188. Mbelle NM, Maningi NE, Tshisevhe V, Modipane L, Amoako DG SJ. Draft Genome  
1478 Sequence of a Clinical *Enterococcus faecium* Sequence Type 18 Strain from South Africa.

- 1479 *Genome Announc* 2017; **5(48)**: e01381–17.
- 1480 189. Kullin, B., T. Brock, N. Rajabally, F. Anwar, G. Vedantam, S. Reid, and V. Abratt.  
1481 "Characterisation of Clostridium difficile strains isolated from Groote Schuur Hospital, Cape  
1482 Town SA. ." *European journal of clinical microbiology & infectious diseases: Off Publ Eur Soc*  
1483 *Clin Microbiol* 2016; **35**, no. **10**: 1709–18.
- 1484 190. Marzouk M, Ferjani A, Amamou S, Alibi S, Ali MH BJ. 'Phenotype, genotype, and  
1485 serotype distribution of macrolide resistant invasive and non-invasive Streptococcus pneumoniae  
1486 strains, in Sousse, Tunisia.' *Med Mal Infect* 2014; **44**, no. **10**: 478–482.
- 1487 191. Bouchami O, Achour W HA. 'Prevalence of resistance phenotypes and genotypes to  
1488 macrolide, lincosamide and streptogramin antibiotics in Gram-positive cocci isolated in Tunisian  
1489 Bone Marrow Transplant Center.' *Pathol Biol* 2011; **59**, no. **4**: 199–206.
- 1490 192. Seni J, Bwanga F, Najjuka CF, Makobore P, Okee M, Mshana SE, Kidenya BR, Joloba ML  
1491 KD. 'Molecular characterization of Staphylococcus aureus from patients with surgical site  
1492 infections at Mulago Hospital in Kampala, Uganda.' *PLoS One* 2013; **8**, no. **6**: e66153.
- 1493 193. Fischer A, Liljander A, Kaspar H, Muriuki C, Fuxelius HH, Bongcam-Rudloff E, de  
1494 Villiers EP, Huber CA, Frey J, Daubenberger C BR. Camel Streptococcus agalactiae populations  
1495 are associated with specific disease complexes and acquired the tetracycline resistance gene tetM  
1496 via a Tn 916-like element. *Vet Res* 2013; **44(1)**: 86.
- 1497 194. Ngbede EO, Raji MA, Kwanashie CN KJ. Antimicrobial resistance and virulence profile of  
1498 enterococci isolated from poultry and cattle sources in Nigeria. *Trop Anim Heal Prod* 2017;  
1499 **49(3)**: 451–8.

1500 195. Akanbi OE, Njom HA, Fri J, Otigbu AC CA. Antimicrobial Susceptibility of  
 1501 *Staphylococcus aureus* Isolated from Recreational Waters and Beach Sand in Eastern Cape  
 1502 Province of South Africa. *Int J Environ Res public Heal* 2017; **14(9)**: 1001.

1503 **Table 1. Frequency distribution of species, clones, resistance genes and MGEs isolated**  
 1504 **from animals, humans and environmental specimens.**

| BACTERIAL RESISTANCE GENES AND MGES | SPECIES, CLONES,                                               | HUMANS | ANIMALS | ENVIRONMENT |
|-------------------------------------|----------------------------------------------------------------|--------|---------|-------------|
| SPECIES                             | <i>E. faecalis</i>                                             | 5      | 6       | 3           |
|                                     | <i>E. faecium</i>                                              | 8      | 3       | 7           |
|                                     | <i>S. agalactiae</i>                                           | 6      | 1       | -           |
|                                     | <i>S. aureus</i>                                               | 26     | 10      | 2           |
|                                     | <i>S. haemolyticus</i>                                         | 2      | 1       | 1           |
|                                     | <i>S. pyogenes</i>                                             | 2      | -       | -           |
|                                     | <i>S. aureus</i> ST5                                           | 3      | 1       | 1           |
|                                     | <i>E. faecium</i> ST18, ST16, ST80, ST910                      | 2      | -       | 2           |
| CLONES                              | <i>S. aureus</i> ST22, ST535                                   | 1      | -       | -           |
|                                     | <i>E. faecium</i> ST317, ST51, ST52, ST175, ST178, ST578, ST81 | 1      | -       | -           |
|                                     | <i>S. aureus</i> ST8, ST88                                     | 3      | -       | -           |
|                                     | <i>S. aureus</i> ST247, ST36                                   | 1      | -       | -           |
|                                     | <i>S. aureus</i> ST789, ST72, ST2021, ST250, ST239             | 1      | -       | -           |
|                                     | <i>S. agalactiae</i> ST617, ST612, ST616                       | -      | -       | 1           |
|                                     | <i>S. aureus</i> ST152, ST772, ST14                            | 1      | -       | -           |

|                         |                                                                                            |      |     |     |
|-------------------------|--------------------------------------------------------------------------------------------|------|-----|-----|
|                         | <i>S. aureus</i> ST241, ST37, ST39                                                         | 1    | -   | -   |
|                         | <i>E. faecium</i> ST203                                                                    | 1    | -   | -   |
|                         | <i>S. aureus</i> ST612                                                                     | 1    | -   | -   |
|                         | <i>E. faecium</i> ST910                                                                    | -    | -   | 1   |
|                         | <i>E. faecium</i> ST480, ST531, ST55, ST532, ST202, ST314, ST985, ST30, ST986, ST12, ST327 | -    | -   | 1   |
|                         | <i>E. faecium</i> ST2, ST28, ST528, ST56, ST885, ST886                                     | -    | -   | 1   |
|                         | <i>S. aureus</i> ST1440, ST1, ST22, ST97, ST239, ST241, ST247, ST1819, ST153, ST256        | 1    | -   | -   |
|                         | <i>S. aureus</i> ST253, ST700                                                              | -    | 1   | -   |
|                         | <i>P. pyogenes</i> emm18, emm42, emm76, emm118                                             | 1    | -   | -   |
|                         | <i>mecA</i>                                                                                | 2370 | 208 | 25  |
|                         | <i>erm(B)</i>                                                                              | 721  | 362 | 184 |
| <b>RESISTANCE GENES</b> | <i>erm(C)</i>                                                                              | 62   | 5   | 8   |
|                         | <i>tet(M)</i>                                                                              | 461  | 82  | 75  |
|                         | <i>tet(k)</i>                                                                              | 90   | 30  | 68  |
|                         | <i>tet(L)</i>                                                                              | 24   | 46  | 8   |
|                         | <i>Van(B)</i>                                                                              | 2    | 320 | 59  |
|                         | <i>Van(A)</i>                                                                              | 18   | -   | 22  |
|                         | <i>Van(C)</i>                                                                              | 7    | 320 | 55  |
|                         | <i>tet(O)</i>                                                                              | 9    | -   | -   |
|                         | <i>dfrA/G</i>                                                                              | 420  | -   | -   |
|                         | <i>aph(3')-IIIa</i>                                                                        | 16   | 11  | 110 |
|                         | <i>aac(6')-aph(2')</i>                                                                     | 84   | 16  | 71  |

|                        |                     |     |    |     |
|------------------------|---------------------|-----|----|-----|
| <b>MGE<sup>1</sup></b> | <i>ant(6)-Ia</i>    | 3   | 23 | 22  |
|                        | <i>blaZ</i>         | 311 | 28 | 23  |
|                        | <i>aph(3')-IIIa</i> | 16  | 11 | 110 |
|                        | <i>mef A/E</i>      | 136 | -  | -   |
|                        | <i>IS16</i>         | 1   | -  | 1   |
|                        | <i>SCCmec</i>       | 12  | 3  | -   |
|                        | <i>Tn916</i>        | 1   | 1  | -   |
|                        |                     |     |    |     |
|                        |                     |     |    |     |
|                        |                     |     |    |     |

1505

---

<sup>1</sup> Mobile genetic elements



1506 **Table 2. Geographical distribution, species, clones, and resistance mechanisms of antibiotic-resistant Gram-positive bacteria**  
 1507 **isolated from humans in Africa from 2007-2017**

| Country (n)        | Year | Organism/Species (n)                                                                                                          | Specimen Sources (n)                                   | Sample size (Resistant isolates) | Resistance rate (%) | Clones (n)                                                                       | Resistance genes/mechanisms (n)                                          | Antibiotics to which strains were resistant                                                    | MGEs <sup>2</sup> (n)  | Reference      |
|--------------------|------|-------------------------------------------------------------------------------------------------------------------------------|--------------------------------------------------------|----------------------------------|---------------------|----------------------------------------------------------------------------------|--------------------------------------------------------------------------|------------------------------------------------------------------------------------------------|------------------------|----------------|
| <b>Algeria (4)</b> | 2015 | <i>S. agalactiae</i> (44)                                                                                                     | Vaginal swab (44)                                      | (44)                             | 100                 | ST1(9), ST19(14), ST10(4), ST158, ST166, ST233, ST460, ST521, ST677              | <i>tetM</i> (44), <i>ermB</i> , (19), <i>mefA/E</i> (1), <i>ermA</i> (1) | TET <sup>3</sup> (44) ERY <sup>4</sup> (13)                                                    | ND                     | <sup>108</sup> |
|                    | 2014 | <i>S. aureus</i> (159)                                                                                                        | Nasal swab (159)                                       | 159 (9)                          | 5.66                | ST80 (4), ST5 (2), ST22 (2), ST535 (1)                                           | <i>mecA</i> (9)                                                          | GEN <sup>5</sup> (3), TET (3), TOB <sup>6</sup> (6) SXT <sup>7</sup> (2)                       | SCC<br><i>mec</i> (9)  | <sup>79</sup>  |
|                    | 2012 | <i>E. faecium</i> (80), <i>E. faecalis</i> (39) <i>E. gallinarum</i> (4), <i>E. raffinosus</i> (1), and <i>E. durans</i> (1). | Urinary (85), cutaneous (24), blood (14), pus (2)      | 125 (108)                        | 87                  | ST 317 (33), ST51(20), ST52(11), ST175 (8), ST78(25), ST578(4), ST81(2), ST16(2) | <i>erm</i> (B) (92), <i>vanC1</i> (4)                                    | AMP <sup>8</sup> (38), GEN (68), TET (103), ERY (106), CAM (18), LVX ((89), NIT (24), VAN (4). | ND                     | <sup>176</sup> |
|                    | 2012 | <i>S. aureus</i> (64)                                                                                                         | Pus (47), venous catheters (7) tracheal aspirates (4), | (64)                             | 100                 | ND                                                                               | <i>MecA</i> (64)                                                         | MET (64), OXA (64), FOX (64)                                                                   | SCC<br><i>mec</i> (46) | <sup>101</sup> |

<sup>2</sup> Mobile genetic elements: plasmids, transposons; integrons

<sup>3</sup> Tetracycline

<sup>4</sup> Erythromycin

<sup>5</sup> Gentamicin

<sup>6</sup> Tobramycin

<sup>7</sup> Sulphamethoxazole-trimethoprim

<sup>8</sup> Ampicillin

|                                                               |      |                           | punction fluids<br>(3), blood (2),<br>urine (1) |          |       |                                                                                              |                                                                                                    |                                                                                                                |                            |     |
|---------------------------------------------------------------|------|---------------------------|-------------------------------------------------|----------|-------|----------------------------------------------------------------------------------------------|----------------------------------------------------------------------------------------------------|----------------------------------------------------------------------------------------------------------------|----------------------------|-----|
| <b>Angola<br/>(3) and<br/>Sao<br/>Tome<br/>princi<br/>pe</b>  | 2015 | <i>S. aureus</i><br>(164) | Nasal swab (164)                                | 164 (29) | 17.68 | ST88(15), ST8(9)                                                                             | <i>MecA</i> (NS)                                                                                   | FOX (29), SXT (26), TET (18),<br>ERY (16), CIP (9) and CLI (8)                                                 | SCC<br><i>mec</i><br>(NS)  | 110 |
|                                                               | 2015 | <i>S.aureus</i><br>(203)  | Nasal (203)                                     | 203(128) | 63.05 | ST8(16), ST5(83),<br>(ST88(19),<br>ST72(5),<br>ST789(1),<br>ST5/2629(2),<br>ST30(2), ST22(1) | <i>MecA</i> (127)                                                                                  | SXT (136), FOX (128),<br>TET (39), PEN (200), RIF (156),<br>CLI (4), ERY (14), CIP (20),<br>GEN (43), CHL (18) | SCC<br><i>mec</i><br>(128) | 141 |
|                                                               | 2014 | <i>S.aureus</i>           | Nasal swab (128)                                | 128(124) | 96.88 | ST8(57), ST88(9),<br>ST8(5), S T72(3),<br>ST789(1)                                           | <i>MecA</i> (77)                                                                                   | PEN (124), FOX (77), SXT (80),<br>GEN (24), RIF (97), CHL (11),<br>CIP (10), TET (16), ERY (8)                 | SCC<br><i>mec</i><br>(128) | 150 |
| <b>Cape<br/>verde</b>                                         | 2015 | <i>S.aureus</i>           | Nasal swab (113)                                | 113(16)  | 14.16 | ST88(2), ST8(1),<br>ST5(3)                                                                   | <i>MecA</i> (6)                                                                                    | FOX (5), TET (5), PEN (109),<br>CIP (2), CLI (3), SXT (12), ERY<br>(16), (FUS (5), MUP (6)                     | SCC<br><i>mec</i><br>(6)   |     |
| <b>Democr<br/>atic<br/>Republi<br/>c of<br/>Congo<br/>(3)</b> | 2017 | <i>S.aureus</i>           | blood(108)                                      | 108(27)  | 25    | ST5(11)<br>,ST8(30),ST88(1),<br>ST152(17)                                                    | <i>dfrG</i> (24), <i>aac</i> (6')-<br><i>aph</i> (2'')(25), <i>tetK</i> (23)<br>, <i>ermC</i> (20) | TET(61),LIN(20),CIP(20),PEN(8<br>7),CHL(5),SXT(4),                                                             | ND                         | 147 |
|                                                               | 2016 | <i>S. aureus</i><br>(100) | Nasal swab (100)                                | 100 (97) | 97    | ST8 (9)                                                                                      | <i>dfrG</i> ,(72), <i>tet</i> (K)<br>(44), <i>FemA</i><br>(98), <i>mecA</i> (33)                   | TMP(72), PEN (97),<br>TET(45),GEN(25),OXA(24),ER<br>Y(20),LUV(16),RIF(7),CHL(7),C<br>LI(4)                     | ND                         | 146 |
|                                                               | 2015 | <i>S. aureus</i><br>(63)  | Nasal swabs (63)                                | 63(10)   | 15.87 | ST8 (8), ST5 (1),<br>ST88 (1)                                                                | <i>MecA</i> (10)                                                                                   | TET(21),ERY(12),CLI(8),PG(60<br>B(12), SXT(6)                                                                  | SCC<br><i>mec</i><br>(10)  | 81  |

|                  |        |                                                 |                                                                                                            |           |       |                                                                          |                                                                                                                            |                                                                                                                                                                                                    |              |      |
|------------------|--------|-------------------------------------------------|------------------------------------------------------------------------------------------------------------|-----------|-------|--------------------------------------------------------------------------|----------------------------------------------------------------------------------------------------------------------------|----------------------------------------------------------------------------------------------------------------------------------------------------------------------------------------------------|--------------|------|
| <b>Egypt (4)</b> | 2015 H | <i>E. faecium</i> (26), <i>E. faecalis</i> (47) | Urine (100)                                                                                                | (73)      | 100   | ND                                                                       | <i>VanA</i> (2)                                                                                                            | PEN(17), AMP(38), CIP(22), GEN(41), STR(73), CHL(12), TET(50), VAN(2)                                                                                                                              | ND           | 95   |
|                  | 2014   | <i>S. agalactiae</i> (100)                      | Vaginal swab (100)                                                                                         | 100 (98)  | 98    | ND                                                                       | <i>ermB</i> (9), <i>ermA</i> (1), <i>mefA/E</i> , (1) <i>tetM</i> (99), <i>tetL</i> (12), <i>tetK</i> (1), <i>tetO</i> (1) | ERY(17), CLI(14), AZI(16), TET(98) and CHL(1)                                                                                                                                                      | ND           | 169  |
|                  | 2014   | <i>S. aureus</i> (127)                          | Diabetic foot ulcers (39), surgical site infection (48) and abscess infections (25), burn discharges (15). | 127 (111) | 87.40 | ND                                                                       | <i>mecA</i> (29)                                                                                                           | AMP(111), AMX(104), OXA(31), LEX(83), CXM(67), CFP(43), FEP(56), CTX(32), SAM(37), AMC(41), AMK(3) CIP(32), NOR(37), OFX(31), LVX(11), GAT(5), ERY(59), Cli(34), TET(66), VAN(2), CHL(44), RIF(35) | ND           | 121  |
|                  | 2013   | <i>S. aureus</i> (94)                           | Blood and wound                                                                                            | 94 (45)   | 47.87 | ND                                                                       | <i>gyrA</i> (C2402T, T2409C, T2460G) (60), <i>gyrB</i> (T1497C, A1578G) (5)                                                | CIP(26), LUX(26), AMC(26), FEP(24), GEN(11), TET(17),CHL(5)                                                                                                                                        | ND           | 52 ] |
| <b>Gabon (1)</b> | 2014   | <i>S. aureus</i> (212)                          | Skin and soft tissue (100) and bloodstream (12)                                                            | 212 (104) | 49.06 | ND                                                                       | <i>dfrA</i> (1), <i>dfrG</i> (100), <i>dfrK+G</i> (1), <i>dfrB</i> (2) <i>mecA</i> (1)                                     | TMP;(104), SXT(100), SMZ(6)                                                                                                                                                                        | ND           | 114  |
| <b>Ghana (2)</b> | 2015   | <i>S. aureus</i> (30)                           | Skin and Soft Tissue Infections (16), bacteraemia (5), nasal swab (9)                                      | (30)      | 100   | ST88 (8),ST8 (5), ST247 (4)                                              | <i>tet(M)</i> (13), <i>tet(K)</i> (10), <i>aphA3</i> (7), <i>aacA-aphD</i> (5)and <i>erm(C)</i> (4).                       | TET(20), NOR(12), MXF(11), ERY(11), CLI(9), KAN(9),GEN(9) and CPT (6)                                                                                                                              | ND           | 137  |
|                  | 2014   | <i>S. aureus</i> (308)                          | Blood (112), SST1(173), others (23)                                                                        | 308 (208) | 67.53 | ST88 (2), ST8 (1), ST789 (1), ST72 (1), ST2021 (1), ST250 (2), ST239 (1) | <i>mecA</i> (9)                                                                                                            | PEN(208), TET(129), and ERY(18)                                                                                                                                                                    | ND           | 136  |
| <b>Kenya (1)</b> | 2016   | <i>S. aureus</i> (93)                           | Blood(93)                                                                                                  | 93 (32)   | 34.41 | ST22(4),ST88(1), ST789(1),ST5(1),                                        | <i>MecA</i> (32)                                                                                                           | CLI(10), ERY(9) and SXT(9),MXF(1), RIF(3), TET(6),LUX(5)                                                                                                                                           | SCC mec (32) | 102  |

|                       |      |                                                                                                                                                                                |                                                                                                                              |           |       |                                              | ST8(2),ST241(12),<br>ST239(2)                                                                                                       |                                                                                    |                    |     |  |
|-----------------------|------|--------------------------------------------------------------------------------------------------------------------------------------------------------------------------------|------------------------------------------------------------------------------------------------------------------------------|-----------|-------|----------------------------------------------|-------------------------------------------------------------------------------------------------------------------------------------|------------------------------------------------------------------------------------|--------------------|-----|--|
| <b>Libya (1)</b>      | 2014 | <i>S. aureus</i><br>(208)                                                                                                                                                      | Nasal swab (44)                                                                                                              | 208(70)   | 33.69 | ND                                           | <i>MecA</i> (35)                                                                                                                    | CIP(22), GEN(24), FUS(49)                                                          | ND                 | 185 |  |
| <b>Morocco (1)</b>    | 2013 | <i>S. aureus</i><br>(30)                                                                                                                                                       | Nasal swab (30)                                                                                                              | 30 (25)   | 83.33 | ND                                           | <i>MecA</i> (1)                                                                                                                     | PEN(25), GEN(1), TOB(1),<br>KAN(1), PF(1), TET(1), ERY(1),<br>SXT(1)               | ND                 | 50  |  |
| <b>Mozambique (1)</b> | 2013 | <i>S. aureus</i><br>(24)                                                                                                                                                       | Wound (24)                                                                                                                   | 24 (9)    | 19.15 | ND                                           | <i>MecA</i> (9)                                                                                                                     | FOX(9), OXA(8)                                                                     | ND                 | 156 |  |
| <b>Namibia (1)</b>    | 2014 | <i>S. aureus</i><br>(116)                                                                                                                                                      | skin and soft<br>tissue (31),<br>urinary tract(19),<br>respiratory tract<br>(37), ear (7), eye<br>(4) and<br>bloodstream (3) | 116 (34)  | 29.31 | ND                                           | <i>dfrA</i> (14), <i>dfrG</i> (20)<br><i>mecA</i> (11)                                                                              | SXT(20), TMP(34)<br>SMZ(20)                                                        | ND                 | 114 |  |
| <b>Nigeria (5)</b>    | 2015 | <i>S. aureus</i><br>(38)                                                                                                                                                       | throat (40), nasal<br>(23), wound (10)                                                                                       | 38 (32)   | 84.21 | ST8 (5), ST152<br>(1), ST772 (1),<br>ST14(1) | <i>mecA</i> (16)                                                                                                                    | TET(32),LUX(7), GEN(5),<br>ERY(5),<br>PEN, SXT(29)                                 | ND                 | 186 |  |
|                       | 2015 | <i>S. aureus</i><br>(290)                                                                                                                                                      | Skin and nasal<br>swab (120),<br>wounds, blood                                                                               | 290 (211) | 72.76 | ND                                           | <i>mecA</i> (7), <i>blaZ</i><br>(284)                                                                                               | PEN(284), SXT(233),<br>TET(51),OXA(7),GEN(11),TOB(<br>11),LUX(23),MXF(21),TGC(51), | SCC<br>mec<br>(7)  | 117 |  |
|                       | 2014 | <i>S.epidermidis</i> (20), <i>S.</i><br><i>haemolyticus</i> (10), <i>S.</i><br><i>saprophyticus</i> (5), <i>S.</i><br><i>capitis</i> , (5),<br><i>S.</i><br><i>lugdunensis</i> | Stool (53)                                                                                                                   | (53)      | 100   | ND                                           | <i>MecA</i> (15), <i>aac(6)</i> –<br><i>aph(2'')</i> (3), <i>ermC</i><br>(4), <i>msrA</i> (1), <i>tetK</i><br>(6) , <i>tetM</i> (4) | PEN(53), OXA(15), GEN(3),<br>ERY(5), TET(7), SXT(19),<br>CHL(4),AMC (31),CIP(1)    | SCC<br>mec(1<br>5) | 117 |  |

|                              |      |                                                                                                                                                                                   |                                                                                                                                                                                      |           |       |                                                  |                                                      |                                                                                         |                     |     |
|------------------------------|------|-----------------------------------------------------------------------------------------------------------------------------------------------------------------------------------|--------------------------------------------------------------------------------------------------------------------------------------------------------------------------------------|-----------|-------|--------------------------------------------------|------------------------------------------------------|-----------------------------------------------------------------------------------------|---------------------|-----|
|                              |      | (2), <i>S. warneri</i> (4), <i>S. xylosum</i> (n4), <i>S. cohnii</i> (3).                                                                                                         |                                                                                                                                                                                      |           |       |                                                  |                                                      |                                                                                         |                     |     |
|                              | 2014 | <i>S. aureus</i> (183)                                                                                                                                                            | Skin and soft tissue (32), urinary tract (9), ear (7), unknown site (4), oropharynx (3), eye (3) and bloodstream (1)                                                                 | 183 (154) | 84.15 | ND                                               | <i>dfrA</i> (2), <i>dfrG</i> (152), <i>mecA</i> (16) | (TMP)(154), SXT(83),SMZ(85)                                                             | ND                  | 114 |
|                              | 2012 | <i>S. aureus</i> (51) <i>S. haemolyticus</i> (21), <i>S. sciuri</i> (9), <i>S. saprophyticus</i> (5), <i>S. warneri</i> (3), <i>S. epidermidis</i> (1) and <i>S. hominis</i> (1), | wounds, (11) skin and soft tissues (12), osteomyelitis (5), burns (1), urinary tract infection (6), septicaemia (17), urinary tract infection (10), otitis media (2), bronchitis (2) | 91 (36)   | 39.56 | ST241 (1), ST8 (1),ST152 (1),ST37 (37),ST39,ST88 | <i>MecA</i> (15), <i>dfrA</i> (3)                    | SXT(13), PEN(15),OXA(15), GEN(6), CIP(7), MXF(1),ERY(5),CLI(4),TET(13), SXT(13), RIF(2) | SCC <i>mec</i> (15) | 139 |
| Sa˜o Tome´ Prıncıpe (3)      | 2015 | <i>S. aureus</i> (114)                                                                                                                                                            | Nasal swab (114)                                                                                                                                                                     | 114(29)   | 25.5  | ST5(2),ST88(11), ST8(13),ST1(2),S T105(1)        | <i>MecA</i> (29)                                     | FOX(29),PEN(114),TET(30),CIP(28),RIF(6),GEN(20),CLIN(20),SXT(58),ERY(25),CH             | SCC <i>mec</i> (29) | 141 |
| Sao Tome prıncıpe and Angola | 2015 | <i>S. aureus</i> (164)                                                                                                                                                            | Nasal swab (164)                                                                                                                                                                     | 164 (29)  | 17.68 | ST88(15),ST8(9)                                  | <i>MecA</i> (NS)                                     | FOX(29), SXT(26), TET(18), ERY(16), CIP (9) and CLI(8)                                  | SCC <i>mec</i> (NS) | 110 |
|                              |      | <i>S. aureus</i> (52)                                                                                                                                                             | Nasal swab (52)                                                                                                                                                                      | 52(27)    | 51.92 | ST8(3), ST88(2),ST5(1),S T105(1)                 | <i>MecA</i> 14                                       | SXT(27),ERY(11), CIP(11),TET(12),FOX(14),RIF(2)                                         | SCC <i>mec</i>      | 166 |

|                          |      |                        |                                                                                                                                                       |           |       |                                                    |                                                                                                                                                                                                        |                                                         |                      |     |
|--------------------------|------|------------------------|-------------------------------------------------------------------------------------------------------------------------------------------------------|-----------|-------|----------------------------------------------------|--------------------------------------------------------------------------------------------------------------------------------------------------------------------------------------------------------|---------------------------------------------------------|----------------------|-----|
| <b>South Africa (10)</b> | 2017 | <i>S.aureus</i> (1914) | Blood (1914)                                                                                                                                          | 1914(557) | 29.10 | ST239(8),ST612(8),ST4121(1),ST36(4),ST5(4),ST33(3) | <i>mecA</i> (483)                                                                                                                                                                                      | β-lactams(557),TET(NS),aminoglycoside(NS),SXT(NS)       | SCC <i>mec</i> (482) | 162 |
|                          | 2017 | <i>S.aureus</i> (97)   | Human                                                                                                                                                 | 97(96)    | 99    | ND                                                 | <i>norA</i> (96), <i>norB</i> (96), <i>mepA</i> (95), <i>tet38</i> (96), <i>sepA</i> (94), <i>mdeA</i> (93), <i>imrs</i> (86), <i>sdrM</i> (83), <i>norC</i> (77), <i>qacA/B</i> (34), <i>smr</i> (42) | NS                                                      | ND                   | 165 |
|                          | 2017 | <i>E. faecalis</i> (1) | Urine (1)                                                                                                                                             | 1         | 100   | ST6(1)                                             | <i>Aph</i> (3')-III(1), <i>ant</i> (6)-Ia (1), <i>aac</i> (6')-aph(2'')(1), <i>isa</i> (A)(1), <i>mphd</i> (1), <i>tetM</i> (1)                                                                        | GEN(1),STR(1),ERY(1),CLI(1),TET(1),CLI(1),TET(1),CIP(1) | ND                   | 187 |
|                          | 2017 | <i>E.faecium</i> (1)   | Urine (1)                                                                                                                                             | 1         | 100   | ST18(1)                                            | <i>Aph</i> (3')-III(1), <i>ant</i> (6)-Ia (1), <i>tetM</i> (1), <i>ermB</i> (1), <i>msr</i> (C)(1), <i>tet</i> (L)                                                                                     | GEN(1),STR(1),ERY(1),CLI(1),TET(1),CLI(1),TET(1),CIP(1) | ND                   | 188 |
|                          | 2016 | <i>S. aureus</i> (27)  | Blood (5), nasal (2), CVP(2), Endotracheal tube (2), pus (2), sputum (1), wound (20), Eye (1),humerus (1), bone (1), cheek (1), buttock (1), head (1) | (27)      | 100   | ND                                                 | <i>MecA</i> (27) and <i>blaZ</i> (27), <i>aac</i> (6')-aph (2'')(25), <i>ermC</i> (13)                                                                                                                 | CIP(23), GEN(20), RIF(19), TET(18), ERY(17), CLI(3)     | ND                   | 189 |

|                     |      |                                                    |                                                     |             |       |                                            |                                                          |                                                                |                      |     |
|---------------------|------|----------------------------------------------------|-----------------------------------------------------|-------------|-------|--------------------------------------------|----------------------------------------------------------|----------------------------------------------------------------|----------------------|-----|
|                     | 2016 | <i>E. faecium</i><br>(120) <i>E. faecalis</i> (40) | Blood (4)                                           | (4)         | 100   | ST80 (1),ST203<br>(1),ST18<br>(1),ST817(1) | <i>van A</i> (3) and <i>van B</i><br>(1)                 | VAN (4)                                                        | ND                   | 175 |
|                     | 2015 | <i>S. agalactiae</i><br>(128)                      | vaginal and rectal<br>swabs (128)                   | 128 (121)   | 94.53 | ND                                         | <i>ermB</i> , (28), <i>linB</i> (48)<br><i>mefA</i> (48) | ERY(27), CLI(32),<br>CHL(32),TET(111),CIP(24)                  | ND                   | 103 |
|                     | 2015 | <i>S. aureus</i><br>(2709)                         | Blood (2709)                                        | 2709 (1231) | 45.44 | ND                                         | <i>mecA</i> (1160)                                       | TET(NS), RIF (NS),MUP(NS),<br>CIP(NS) and SXT(NS)<br>MET(1231) | SCC<br>mec<br>(1160) | 80  |
|                     | 2012 | <i>S. aureus</i><br>(13746)                        | Human (13746)                                       | 13746(3298) | 24    | ST5 (1), ST612<br>(44),                    | <i>RpoB</i> (H481Y,<br>H481N, I527M)<br>(NS)             | RIF(1760)                                                      | ND                   | 80  |
| <b>Tanzania (1)</b> | 2014 | <i>S. aureus</i><br>(87)                           | Skin and soft<br>tissue (39) and<br>bloodstream (2) | 87 (32)     | 36.78 | ND                                         | <i>dfpG</i> (32)                                         | SMZ(5), TMP (32)                                               | ND                   | 111 |

|                         |      |                                                     |                                                           |           |       |                                                                                                                                                   |                                                                                                                                                                                                           |                                                                                             |                           |     |
|-------------------------|------|-----------------------------------------------------|-----------------------------------------------------------|-----------|-------|---------------------------------------------------------------------------------------------------------------------------------------------------|-----------------------------------------------------------------------------------------------------------------------------------------------------------------------------------------------------------|---------------------------------------------------------------------------------------------|---------------------------|-----|
| <b>Tunisia<br/>(12)</b> | 2015 | <i>S. aureus</i><br>(99)                            | Human (99)                                                | (99)      | 100   | ST247 (12),<br>ST239 (6), ST728<br>(2), ST241 (1),<br>ST398 (1), ST5 (1)<br>and ST641 (1)                                                         | <i>MecA</i> (24), <i>tet(K)</i><br>(6), <i>tet(L)</i> (1) and/or<br><i>tet(M)</i> (18), <i>erm (A)</i> ,<br><i>aph(2')-acc(6')</i> (13)                                                                   | TET(24), GEN(18), ERY(15),<br>FOF(1), CLI(14), OFX(16),<br>TOB(20), FUS(5)                  | ND                        | 71  |
|                         | 2014 | <i>E. faecium</i><br>(13), <i>E.gallinarum</i> (3), | blood (8), pus (3),<br>urine (2) and<br>rectal swabs (3). | (16)      | 100   | ST18 (1)and ST80<br>(2)                                                                                                                           | <i>VanA</i><br>(13), <i>vanC1</i> (3),<br><i>erm(B)</i> (16),<br><i>tet(M)</i> (15), <i>tetI</i> (1),<br><i>aac(6')</i> - <i>aph(2'')</i> (13)<br><i>aph(3')</i> - <i>IIIa</i><br>(16), <i>ant(6)</i> (3) | VAN(16),TEC(13),<br>AMP(16),CIP(16), ERY,<br>TET(16), KAN(13), STR(13),<br>SXT(16), GEN(8), | <i>IS16</i><br>(3)        | 190 |
|                         | 2013 | <i>S. aureus</i><br>(69)                            | Human (69)                                                | (69)      | 100   | ST80 (41),<br>ST1440 (1), ST1<br>(2), ST5 (5), ST22<br>(1), ST97 (2),<br>ST239 (4), ST241<br>(3), ST247 (3),<br>ST1819 (3),ST153<br>(2),ST256 (1) | <i>MecA</i> (59)                                                                                                                                                                                          | KAN(62), AMK(62(18),<br>TETs(61), OFX(20) , CIP(31),<br>ERY(38) , CLI(12), RIF(22)          | SCC<br><i>mec</i><br>(59) | 68  |
|                         | 2012 | <i>S. agalactiae</i><br>(226)                       | Female genital<br>(120), gastric fluid<br>(106)           | 226 (220) | 97.34 | ND                                                                                                                                                | <i>erm(B)</i> (79), <i>mef(A)</i><br>(2), <i>tet(M)</i> (205),<br><i>tet(L)</i> (10) <i>tet(O)</i> (5),<br><i>tet(T)</i> (1)                                                                              | CHL(7), RIF(43), ERY(90) and<br>TET(220), STR(7),GEN(7)                                     | <i>Tn916</i>              | 132 |



|      |                                                                        |                                                                                                                                                                                       |          |       |                                                                          |                                                                           |                                                                                                                                                       |                        |     |
|------|------------------------------------------------------------------------|---------------------------------------------------------------------------------------------------------------------------------------------------------------------------------------|----------|-------|--------------------------------------------------------------------------|---------------------------------------------------------------------------|-------------------------------------------------------------------------------------------------------------------------------------------------------|------------------------|-----|
| 2012 | <i>S. haemolyticus</i> (46)                                            | Blood (19), intravascular catheters (14), others (13)                                                                                                                                 | 46 (36)  | 78.26 | ND                                                                       | <i>mecA</i> (28)                                                          | PEN(36), OXA(36), GEN(34), KAN(34), and TOB(34), ERY(33), SXT(32), OFX(32), CIP(32), STR(25), fusidic acid(14), TET(11),RIF(9),LIN(6),(CHL(1),F OF(1) | SCC<br><i>mec</i> (28) | 131 |
| 2011 | <i>S. aureus</i> (1463)                                                | Skin (1463)                                                                                                                                                                           | 160 (5)  | 3.13  | ND                                                                       | <i>erm(C</i> (3)), <i>erm(A</i> (1), <i>vat(B</i> (5), <i>vga(B</i> (5)   | PEN(5),OXA(4), GEN(4), KAN(5), TOB(4(5) and RIF(5),LIN(5)                                                                                             | ND                     | 172 |
| 2011 | <i>S. pyogenes</i> (103)                                               | skin (43), respiratory tract (41), blood (12), fluids (4), endometrium (1), vagina (1), and urine (1).                                                                                | 103 (72) | 70    | <i>emm18</i> (4), <i>emm42</i> (9), <i>emm76</i> (6), <i>emm118</i> (10) | <i>erm(B</i> (50, <i>tet(M</i> (63), <i>tet(O)</i> (3)                    | ERY(5), CLI (5), and TET(72),                                                                                                                         | <i>Tn916</i> (62)      | 173 |
| 2010 | <i>S. pyogenes</i> (193)                                               | throat (63) (32.7%), pus (89), punctures (30), blood (4), other sources (7)                                                                                                           | 193 (13) | 6.74  | ND                                                                       | <i>ermB</i> (6), <i>mefA</i> (2)                                          | ERY(7) and TET(6)                                                                                                                                     | ND                     | 171 |
| 2010 | <i>S. agalactiae</i> (160)                                             | Urinary tract (160)                                                                                                                                                                   | (160)    | 100   | ND                                                                       | <i>erm(B</i> (132), <i>erm(TR</i> (13), <i>mef(A</i> (3)                  | ERY(160), LIN(135) and SB (135)                                                                                                                       | ND                     | 191 |
| 2009 | <i>S. epidermis</i> (77), <i>S. mitis</i> (50), <i>E. faecium</i> (45) | blood cultures (55), central venous catheters, ( 22),stool cultures (40), respiratory tract (2) and different sites ( 3), systematic nasopharyngeal specimens (42), upper respiratory | 172(95)  | 55.23 | ND                                                                       | <i>erm ( C</i> (18), , <i>ermB</i> (6), <i>ermA</i> (11), <i>msrA</i> (5) | OXA(39), AMP( 28),PEN(90),ERY(119),LIN(97), PRI (3),GEN(71),RIF(78), TEC(50),                                                                         | ND                     | 96  |

---

tract(5) and other  
sources ( 3).

---

2008

---

|                       |      |                          |                 |        |      |    |                  |                                     |                            |                |
|-----------------------|------|--------------------------|-----------------|--------|------|----|------------------|-------------------------------------|----------------------------|----------------|
| <b>Uganda<br/>(2)</b> | 2013 | <i>S. aureus</i><br>(64) | Nasal swab (64) | 64(24) | 37.5 | ND | <i>MecA</i> (24) | OXA(22), GEN(8), CIP(12),<br>CHL(9) | <i>SCCm<br/>ec</i><br>(24) | <sup>192</sup> |
|-----------------------|------|--------------------------|-----------------|--------|------|----|------------------|-------------------------------------|----------------------------|----------------|

---

1508

1509

1510

1511

1512

1513

1514

1515

1516

1517 **Table 3. Geographical distribution, species, clones, and resistance mechanisms of antibiotic-resistant Gram-positive bacteria**  
 1518 **isolated from animals in Africa from 2007-2017.**

| Country (n) | Year | Organism/Species (n)                                                                                                                                                                                                            | Specimen Sources (n)                                                                            | Sample size (Resistance isolates) | Resistance rate (%) | Clones (n) | Resistance genes/mechanisms (n)                                         | Antibiotics to which strains were resistant                                                                          | MGEs <sup>9</sup> (n) | Reference |
|-------------|------|---------------------------------------------------------------------------------------------------------------------------------------------------------------------------------------------------------------------------------|-------------------------------------------------------------------------------------------------|-----------------------------------|---------------------|------------|-------------------------------------------------------------------------|----------------------------------------------------------------------------------------------------------------------|-----------------------|-----------|
| Egypt (5)   | 2017 | <i>S.aureus</i> (3), <i>S.hycus</i> (6),<br><i>S.intermedns</i> (3),<br><i>S.epidermis</i> (1),<br><i>S.hemolyticus</i> (1),<br><i>S.hominis</i> (1),<br><i>S.lugdunensis</i> (3),<br><i>S.simulans</i> (1), <i>S.scuri</i> (4) | imported beef meat (23)                                                                         | 23(16)                            | 69.57               | ND         | <i>mecA</i> (5) <i>gyrA</i> (12),<br><i>griA</i> (10), <i>gyrB</i> (6), | AMP((6),CHL(1),CIP(8),CLI(15),<br>ERY(6),GEN(14),MET(8),OXA(13),<br>PEN(22), TET(6)                                  | ND                    | 122       |
|             | 2016 | <i>S. aureus</i> (30)                                                                                                                                                                                                           | raw chicken breast fillet (40), sliced luncheon meat (20), and chicken nuggets (20), Human (18) | 40 (21)                           | 33.33               | ND         | <i>mecA</i> (10)                                                        | DOX(31), AMX(29), OFX(10), CFP(23), CLI(21), GEN(20), APR(16), ERY(21), SXT(23), LUX(18), NAL(20), OFX(10), CIP(16). | ND                    | 51        |
|             | 2016 | <i>S. aureus</i> (200)                                                                                                                                                                                                          | Raw milk (40), Damietta Cheese (40), Kareish cheese (40), ice cream (40), and yogurt (40)       | 200 (106)                         | 53                  | ND         | <i>MecA</i> (106)                                                       | TET(270), NEL(78), AMX(230), CLX(314),STR(186),SXT(58), GEN(114), PEN(364), RIF(152), CHL(128), AMK(146), VAN(36)    | ND                    | 30        |
|             | 2015 | <i>S. aureus</i> (133)                                                                                                                                                                                                          | cow milk samples (61), various origins (14), minced meat (6), sausage (4) and                   | 133 (96)                          | 72.18               | ND         | <i>mecA</i> (30)                                                        | CRO(96), TET(90), OXA(70), FOX(65), ERY(81),VAN(4),IPM(7),CRO(96),CHL(12),<br>.GEN(36),CLI(29), CIP(31),RIF (18)     | SCCmec (25)           | 46        |

<sup>9</sup> Mobile genetic elements: plasmids, transposons; integrons

|                     |      |                                                                                                                                               |                                                                       |           |       |                                    |                                                                                             |                                                                                                                             |                        |     |
|---------------------|------|-----------------------------------------------------------------------------------------------------------------------------------------------|-----------------------------------------------------------------------|-----------|-------|------------------------------------|---------------------------------------------------------------------------------------------|-----------------------------------------------------------------------------------------------------------------------------|------------------------|-----|
|                     |      |                                                                                                                                               | burger (7), pus (22), sputum (17), urine (1), cerebrospinal fluid (1) |           |       |                                    |                                                                                             |                                                                                                                             |                        |     |
|                     | 2011 | <i>S. aureus</i> (4)                                                                                                                          | dogs swab (70), cats swab (48), human nasal and oral swabs (50).      | (4)       | 100   | ND                                 | <i>mecA</i> (4)                                                                             | OXA(4), FOX(4), AMP(3), FOX(4), RIF(3), GEN(2), CLI(2), RIF(2), CIP(2), TET(1)                                              | ND                     | 112 |
| <b>Kenya (1)</b>    | 2013 | <i>S. agalactiae</i> (92)                                                                                                                     | Camel(92)                                                             | 92 (37)   | 36    | ST617 (8), ST-612 (1), ST-616 (22) | <i>TetM</i> (37)                                                                            | TET(37)                                                                                                                     | Tn916 (37)             | 193 |
| <b>Nigeria</b>      | 2016 | <i>E. faecium</i> (108), <i>E. gallinarum</i> , (30), <i>E. faecalis</i> (5), <i>E. hirae</i> . (5) <i>E.mundtii</i> (12)                     | Cattle (130), chickens (130), manure (130)                            | 167 (102) | 61.0  | ND                                 | <i>tetK</i> (NS), <i>tetL</i> (NS), <i>tetM</i> (NS), <i>tetO</i> (NS) and <i>ermB</i> (NS) | TET (102), ERY (102), CHL (13), GEN(55), STR(47), AMP(75)                                                                   | ND                     | 194 |
| <b>South Africa</b> | 2015 | <i>S. aureus</i> (211)                                                                                                                        | Milk (211)                                                            | 211 (124) | 58.77 | ND                                 | <i>MecA</i> (19)                                                                            | PEN (124), AMP(99), OXA (93), VAN(47), TEC(116), TET(56), ERY(56), STR(89), KAN(55), GEN(47), SXT (37)                      | ND                     | 44  |
|                     | 2015 | <i>E. faecalis</i> (40), <i>E. hirae</i> (100), <i>E. durans</i> (60), <i>E. faecium</i> (120)                                                | Pigs (320)                                                            | (320)     | 100   | ND                                 | <i>vanB</i> , (320) <i>vanC1</i> (320), <i>vanC2/3</i> (320), <i>ermB</i> , (300)           | VAN(320), STR(320) and CLX(320), STR(320), CET(286), PEN(292), CIP(248), AMO(64), AMK(272), CLI(316), ERY (280), IPM (52),  | ND                     | 31  |
|                     | 2013 | <i>S. xylosus</i> (18), <i>S. aureus</i> (28), <i>S. haemolyticus</i> (42), <i>S. capitis</i> (18), and other <i>Staphylococcus spp.</i> (14) | Animals (120)                                                         | (120)     | 100   | ND                                 | <i>mecA</i> (NS) and <i>mphC</i> (NS)                                                       | PEN (90), MER(3), VAN(14), CTX(14), CFZ(48), OXA(46), MIC(19), TET(100), ERY(14), CLI(19), NAL(120), CIP(5), OFX(6), LUX(2) | SCC <sub>me</sub> (NS) | 118 |

|                     |      |                                                                                                                                                                                                    |                                                                             |          |       |                                                                               |                                                                                                                                                                                                                     |                                                                     |            |     |
|---------------------|------|----------------------------------------------------------------------------------------------------------------------------------------------------------------------------------------------------|-----------------------------------------------------------------------------|----------|-------|-------------------------------------------------------------------------------|---------------------------------------------------------------------------------------------------------------------------------------------------------------------------------------------------------------------|---------------------------------------------------------------------|------------|-----|
| <b>Senegal (1)</b>  | 2012 | <i>S. aureus</i> (57)                                                                                                                                                                              | Swabs from pigs (300) and farmers                                           | (57)     | 100   | ST5 (5)                                                                       | <i>mecA</i> (6)                                                                                                                                                                                                     | PEN(57), SXT(35), TET(20)                                           | SCCmec (6) | 82  |
| <b>Tanzania (1)</b> | 2014 | <i>E. faecium</i> (95) <i>E. faecalis</i> (9) <i>E. gallinarum</i> (7) <i>E. Hirae</i> (9)                                                                                                         | Faecal samples of buffalo (35), wildebeest (40), zebra (40) and cattle (20) | 120 (42) | 35    | ND                                                                            | <i>TetW</i> (NS) and <i>sullI</i> (NS)                                                                                                                                                                              | VAN(10),AMP(10),TET(40),SXT(32),RIF(53),ERY(42),GEN(35),AMP(31)     | ND         | 32  |
| <b>Tunisia</b>      | 2017 | <i>E. faecium</i> (31), <i>E. faecalis</i> (14), <i>E. durans</i> (6), <i>E. casseliflavus</i> (2), <i>E. gallinarum</i> (2)                                                                       | Faecal sample of cats(20), dogs(50)                                         | 58(31)   | 53.45 | ND                                                                            | <i>ermB</i> (22), <i>tetM</i> (5), <i>tetM+tetL</i> (16), <i>tetL</i> (4), <i>ant</i> (6')- <i>la</i> (11), <i>aac</i> (6')- <i>le-aph</i> (2")- <i>la</i> (16), <i>aph</i> (3')- <i>IIIa</i> (11), <i>catA</i> (1) | AMP(1),ERY(26),CIP(30),PRI(9),STR(12),KAN(12),GEN(9),TET(21),CHL(7) | ND         | 45  |
|                     | 2013 | <i>E. faecalis</i> (49), <i>E. faecium</i> (30), <i>E. gallinarum</i> (12), <i>E. hirae</i> (12), <i>E. casseliflavus</i> (2), <i>E. durans</i> (2)                                                | Meat (199)                                                                  | (119)    | 78.5  | ST260(1), ST454(1), ST452(1), ST22(1),S T300(1),S T455(1),S T453(1),S T456(1) | <i>tet</i> (M) (36) <i>tet</i> (L) (32), <i>erm</i> (B) (33), <i>aac</i> (6')- <i>aph</i> (2") (1), <i>ant</i> (6) (7)                                                                                              | TET(57), ERY(43), STR(17), CHLI(4),GEN (1)                          | ND         | 183 |
|                     | 2013 | <i>E. mundtii</i> , (23) <i>E. casseliflavus</i> (20), <i>E. hirae</i> (19), <i>E. faecalis</i> (10), <i>E. faecium</i> (10), <i>E. durans</i> (7), <i>E. gallinarum</i> (7), <i>E. dispar</i> (2) | Cattle (92)                                                                 | 92 (72)  | 78    | ND                                                                            | <i>erm</i> (B) (7), <i>tet</i> (M) (4) and/or <i>tet</i> (L)(4)                                                                                                                                                     | ERY(10), TET(4) and SXT(72)                                         | ND         | 182 |
|                     | 2012 | <i>S. aureus</i> (73)                                                                                                                                                                              | nasal swab from sheep (73)                                                  | 73 (5)   | 6.85  | ST153(5)                                                                      | <i>MecA</i> (5), <i>blaZ</i> (28), <i>ant</i> (6)- <i>la</i> (5), , <i>erm</i> (C) (5), <i>tet</i> (K) (30)                                                                                                         | PEN(5), STR(5), KAN(5), ERY(5), TET (5), FUS(5)                     | ND         | 107 |

|                   |      |                 |                               |        |       |                 |                  |                                              |    |     |
|-------------------|------|-----------------|-------------------------------|--------|-------|-----------------|------------------|----------------------------------------------|----|-----|
| <b>Uganda (1)</b> | 2017 | <i>S.aureus</i> | milk(30),sour milk sample(11) | 41(30) | 73.17 | ST97(1),S T1(2) | <i>mecA</i> (23) | TET(30),RIF(1),SXT(2),ERY(1), GEN((1),CLI(1) | ND | 148 |
|-------------------|------|-----------------|-------------------------------|--------|-------|-----------------|------------------|----------------------------------------------|----|-----|

1519

1520 **Table 4. Geographical distribution, species, clones, and resistance mechanisms of antibiotic-resistant Gram-positive bacteria**  
 1521 **isolated from the environment in Africa from 2007-2017.**

| <b>Coun try (n)</b>      | <b>Ye ar</b> | <b>Organism/ Species (n)</b>                   | <b>Specimen Sources (n)</b>                                            | <b>Sampl e size (Resist ant isolate s)</b> | <b>Resista nce rate (%)</b> | <b>Clones (n)</b> | <b>Resistance genes/ mechanisms (n)</b>                                                                                                                  | <b>Antibiotics to which strains were resistant</b>                                          | <b>MGE s<sup>10</sup> (n)</b> | <b>Refere nce</b> |
|--------------------------|--------------|------------------------------------------------|------------------------------------------------------------------------|--------------------------------------------|-----------------------------|-------------------|----------------------------------------------------------------------------------------------------------------------------------------------------------|---------------------------------------------------------------------------------------------|-------------------------------|-------------------|
| <b>Niger ia (1)</b>      | 2017         | <i>E.faecium</i> (100)                         | Vegetables soil, farm, Cloacal swabs (25), Manure (8), Rectal swabs(2) | (100)                                      | 100                         | ND                | <i>aac</i> (6')- <i>le-aph</i> (2'')- <i>la</i> (35), <i>aph</i> (2')- <i>1c</i> (31), <i>aph</i> (3')- <i>lla</i> (32), <i>ant</i> (4')- <i>la</i> (14) | AMP (63), GEN(37)                                                                           | ND                            | 48                |
| <b>Sout h Africa (3)</b> | 2017         | <i>S.aureus</i>                                | Recreational waters and beach sand (30)                                | (30)                                       | 100                         | ND                | <i>mecA</i> (5), <i>femA</i> (16). <i>rpoB</i> (11), <i>blaZ</i> (16), <i>ermB</i> (15), <i>tetM</i> (8)                                                 | AMP (29),PEN (29),RIF(24), CLI(24),OXA (22),ERY(21),VAN(15), TET(13),SXT(13),CIP(10),GEN(1) | ND                            | 195               |
|                          | 2015         | <i>E. faecium</i> (30), <i>E. durans.</i> (15) | waste water (32) and effluent (32)                                     | (45)                                       | 100                         | ND                | <i>erm</i> (B) (40), <i>vanB</i> , (42) <i>vanC1</i> (42), <i>vanC2/3</i> (42)                                                                           | PEN(38), ERY(40), CTX(43), GEN(28),IPM(43), TET(45), KAN(43), CIP(43), VAN(42),CLI(45)      | ND                            | 28                |

<sup>10</sup> Mobile genetic elements: plasmids, transposons; integrons

|                         |          |                                                                                                                                                                                                                                                                                                     |                                                                                                                        |              |       |                                                                                                                       |                                                                                                                                                                                                                                              |                                                                                          |                     |     |
|-------------------------|----------|-----------------------------------------------------------------------------------------------------------------------------------------------------------------------------------------------------------------------------------------------------------------------------------------------------|------------------------------------------------------------------------------------------------------------------------|--------------|-------|-----------------------------------------------------------------------------------------------------------------------|----------------------------------------------------------------------------------------------------------------------------------------------------------------------------------------------------------------------------------------------|------------------------------------------------------------------------------------------|---------------------|-----|
|                         | 20<br>13 | <i>E. faecium</i> (179)                                                                                                                                                                                                                                                                             | Borehole<br>Water (179)                                                                                                | 179<br>(172) | 96.09 | ND                                                                                                                    | <i>VanA</i> (17) and <i>vanB</i> (17)                                                                                                                                                                                                        | AMP(158), VAN (166)and<br>PEN(172),CHL(11),KAN(12),G<br>EN(3),AMX (155), ERY(86)         | ND                  | 27  |
| <b>Tunis<br/>ia (6)</b> | 20<br>17 | <i>S.aureus</i>                                                                                                                                                                                                                                                                                     | Wastewater                                                                                                             | 12<br>(100)  | 100   | ST3245(7),ST<br>15(1)                                                                                                 | <i>blaZ</i> (7), <i>msrA</i> (7), <i>tetK</i> (1),                                                                                                                                                                                           | PEN(12),ERY(7),TET(1),CLI(1<br>)                                                         | ND                  | 41  |
|                         | 20<br>16 | <i>E. faecium</i> (86), <i>E.</i><br><i>faecalis</i> (8),<br><i>E.casseliflavus</i> (6)                                                                                                                                                                                                             | Hands (50),<br>inanimate<br>such as<br>beds,<br>treatment<br>tables,<br>toilets,<br>faucets,<br>wrists, sinks<br>(250) | (100)        | 100   | ST910 (13),<br>ST80 (1)                                                                                               | <i>erm</i> (B) (71), <i>tet</i> (M) (18),<br><i>aph</i> (3')-IIIa (27), <i>ant</i> (6)-<br>Ia (15), <i>cat</i> (A) (4),<br><i>van</i> (C2) (6)                                                                                               | ERY(73), TET(20),STR(27)<br>and KAN(28),<br>VAN(14),CHL(10),SXT(100),<br>CIP(48),PRI(18) | <i>IS16</i><br>(14) | 43  |
|                         | 20<br>16 | <i>S. saprophyticus</i> , (30)<br><i>S. haemolyticus</i> (38).<br><i>S. epidermidis</i> (NS),<br><i>S. cohnii</i> (NS), <i>S.</i><br><i>warneri</i> (NS), <i>S. sciuri</i><br>(NS), <i>S. simulant</i><br>(NS)s, <i>S. pasteurii</i><br>(NS), <i>S. arlettae</i> (NS)<br>and <i>S. xilosus</i> (NS) | Inanimate<br>surfaces (83)                                                                                             | 83 (32)      | 38.55 | ND                                                                                                                    | <i>MecA</i> -(20), <i>msr</i> (A)(32);<br><i>erm</i> (C)(8), <i>tet</i> (K)and/or<br><i>tet</i> (M)(21), <i>aac</i> (6')-Ie-<br><i>aph</i> (2')-Ia (16),( <i>aph</i> (3')-<br>IIIa(19), <i>ant</i> (4')-Ia<br>(n=14), <i>ant</i> (6')-Ia (3) | ERY(32), TET(21), GEN(16),<br>KAN(19), TOB(14), STR(3),                                  | ND                  | 125 |
|                         | 20<br>15 | <i>E. faecium</i> (34), <i>E.</i><br><i>hirae</i> (23) , <i>E. faecalis</i><br>(4), and <i>E.</i><br><i>casseliflavus</i> (4)                                                                                                                                                                       | Vegetable<br>food (34), soil<br>and irrigation<br>water (27)                                                           | 65 (40)      | 61.54 | ST2 (5), ST16<br>(2), , ST528<br>(2), ST56 (1),<br>ST885 (1),<br>ST886 (1)                                            | <i>erm</i> (B) (12), <i>tet</i> (M)-<br><i>tet</i> (L)(10), <i>aph</i> (3')-III,<br>(10) <i>ant</i> (6) (2), <i>van</i> C2(4)                                                                                                                | CIP(42), ERY(12), TET(10),<br>KAN(10), CHL(5), STR(2),<br>and GEN(5), VAN(4)             | ND                  | 42  |
|                         | 20<br>15 | <i>E. faecium</i> (54), <i>E.</i><br><i>faecalis</i> (17), <i>E. hirae</i><br>(8)<br><i>E.casseliflavus</i><br>(4), <i>E.durans</i> (2)                                                                                                                                                             | waste and<br>surface water<br>(114)                                                                                    | (85)         | 100   | ST480 (1),<br>ST531<br>(1),ST55<br>(1),ST532(1),<br>ST202<br>(1),ST314(1),<br>ST985(1),ST3<br>0 (1),ST986<br>(1),ST12 | <i>aph</i> (3')-IIIa (22), <i>ant</i> (6)-Ia<br>(4), <i>erm</i> (B) (34), <i>tet</i> (M)<br>(13), <i>tet</i> (L)(8), <i>aac</i> (6')-<br>Ie- <i>aph</i> (2')(15)                                                                             | GEN(22), KAN(22), STR(7),<br>ERY(36), TET(13), SXT(79),<br>CIP(6),                       | ND                  | 181 |

|          |                                                   |                                                                                       |      |     |                           |                                                                                                                                             |                                                                                                                                                                      |                 |    |  |  |  |  |  |  |  |
|----------|---------------------------------------------------|---------------------------------------------------------------------------------------|------|-----|---------------------------|---------------------------------------------------------------------------------------------------------------------------------------------|----------------------------------------------------------------------------------------------------------------------------------------------------------------------|-----------------|----|--|--|--|--|--|--|--|
|          |                                                   |                                                                                       |      |     | (1),ST296<br>(1),ST327(1) |                                                                                                                                             |                                                                                                                                                                      |                 |    |  |  |  |  |  |  |  |
| 20<br>14 | <i>E.faecium</i> (5), <i>E.casselliflavus</i> (7) | Hospital environment( beds, treatment table, toilet, faucet, wrist and sink)<br>(100) | (12) | 100 | ST80(1)                   | <i>VanA</i> (5), <i>vanC2</i> (7), <i>ermB</i> (12), <i>tetM</i> (5), <i>aph</i> (3')- <i>lla</i> (5), <i>aac</i> (6')- <i>aph</i> (2'')(5) | <i>VAN</i> ,(12), <i>AMP</i> (5), <i>CIP</i> (12), <i>ERY</i> (12), <i>TET</i> (8), <i>STR</i> (6), <i>KAN</i> (80), <i>SXT</i> (11), <i>GEN</i> (3), <i>TEC</i> (5) | <i>IS16</i> (1) | 71 |  |  |  |  |  |  |  |

1522

1523 **Table 5. Distribution of resistance genes per clones in Africa.**

| Clones                  | <i>mecA</i> | <i>vanA</i> | <i>dfrG</i> | <i>tet(K)</i> | <i>tetM</i> | <i>Aph</i> (3)- <i>lla</i> | <i>ermC</i> | <i>acc</i> (6')- <i>aph</i> (2'') | <i>ermB</i> | <i>Van B</i> | <i>blaZ</i> | <i>femA</i> | <i>Van C1</i> | <i>MefA/E</i> | <i>GyrA</i> | <i>GyrB</i> |
|-------------------------|-------------|-------------|-------------|---------------|-------------|----------------------------|-------------|-----------------------------------|-------------|--------------|-------------|-------------|---------------|---------------|-------------|-------------|
| <i>S. aureus</i> ST5    | 11          | -           | 1           | 2             | -           | -                          | -           | 1                                 | -           | -            | 1           | -           | -             | -             | -           | -           |
| <i>S. aureus</i> ST80   | 5           | -           | 1           | 2             | 1           | 1                          | -           | 1                                 | 1           | 1            | -           | -           | -             | -             | -           | -           |
| <i>S. aureus</i> ST8    | 10          | -           | 2           | 3             | 1           | -                          | 2           | 1                                 | -           | -            | -           | -           | -             | -             | -           | -           |
| <i>S. aureus</i> ST88   | 5           | -           | 1           | 2             | 1           | -                          | 2           | 1                                 | -           | -            | -           | -           | -             | -             | -           | -           |
| <i>S. aureus</i> ST22   | 4           | -           | -           | -             | -           | -                          | -           | -                                 | -           | -            | -           | -           | -             | -             | -           | -           |
| <i>S. aureus</i> 152    | 2           | -           | 1           | 1             | -           | -                          | 1           | 1                                 | -           | -            | -           | -           | -             | -             | -           | -           |
| <i>S. aureus</i> ST247  | 2           | -           | -           | 1             | 1           | -                          | 1           | -                                 | -           | -            | -           | -           | -             | -             | -           | -           |
| <i>S.aureus</i> ST239   | 3           | -           | -           | 1             | 1           | -                          | -           | -                                 | -           | -            | -           | -           | -             | -             | -           | -           |
| <i>E.faecalis</i> ST81  | -           | -           | -           | -             | -           | -                          | -           | -                                 | 1           | -            | -           | -           | 1             | -             | -           | -           |
| <i>E.faecalis</i> ST578 | -           | -           | -           | -             | -           | -                          | -           | -                                 | 1           | -            | -           | -           | 1             | -             | -           | -           |
| <i>E.faecalis</i> T16   | -           | -           | -           | -             | 1           | 1                          | -           | -                                 | 1           | -            | -           | -           | 1             | -             | -           | -           |
| <i>E. faecium</i> ST52  | -           | -           | -           | -             | -           | -                          | -           | -                                 | 1           | -            | -           | -           | 1             | -             | -           | -           |
| <i>E. faecium</i> ST51  | -           | -           | -           | -             | -           | -                          | -           | -                                 | 1           | -            | -           | -           | 1             | -             | -           | -           |
| <i>E.faecium</i> ST317  | -           | -           | -           | -             | -           | -                          | -           | -                                 | 1           | -            | -           | -           | 1             | -             | -           | -           |
| <i>E.faecium</i> S528   | -           | -           | -           | -             | 1           | 1                          | -           | 1                                 | -           | -            | -           | -           | 1             | -             | -           | -           |



|                                   |   |   |   |   |   |   |   |   |   |   |   |   |   |   |   |   |
|-----------------------------------|---|---|---|---|---|---|---|---|---|---|---|---|---|---|---|---|
| <b><i>E.faecium</i> ST2</b>       | - | - | - | - | 1 | 1 | - | - | 2 | - | - | - | 2 | - | - | - |
| <b><i>E.faecium</i> ST910</b>     | - | - | - | - | 1 | 1 | - | - | 1 | - | - | - | 1 | - | - | - |
| <b><i>E.faecium</i> ST18</b>      | - | 2 | - | - | 1 | 1 | - | 1 | 1 | 1 | - | - | - | - | - | - |
| <b>S. agalactiae</b>              |   |   |   |   |   |   |   |   |   |   |   |   |   |   |   |   |
| <b><i>S. agalactiae</i> ST612</b> | - | - | - | - | 1 | - | - | - | - | - | - | - | - | - | - | - |
| <b><i>S. agalactiae</i> ST616</b> | - | - | - | - | 1 | - | - | - | - | - | - | - | - | - | - | - |
| <b><i>S. agalactiae</i> ST617</b> | - | - | - | - | 1 | - | - | - | - | - | - | - | - | - | - | - |
| <b><i>S. agalactiae</i> ST10</b>  | - | - | - | - | 1 | - | - | - | 1 | - | - | - | 1 | - | - | - |
| <b><i>S. agalactiae</i> ST19</b>  | - | - | - | - | 1 | - | - | - | 1 | - | - | - | 1 | - | - | - |
| <b><i>S. agalactiae</i> ST1</b>   | - | - | - | - | 1 | - | - | - | 1 | - | - | - | 1 | - | - | - |

1524

1525 **Figure 1.** PRISMA-adapted flow chart showing included and excluded articles. All search was conducted on Pubmed and a final number of 77 manuscripts were  
1526 used for the qualitative analysis.

1527 **Figure 2.** Frequency and distribution of mobile genetic elements (MGEs), resistance genes and antibiotics with recorded resistance in Gram-positive bacteria in  
1528 Africa. 2ai) Shows the frequency of the various resistance genes found in the drug-resistant Gram-Positive bacterial strains. *MecA* and *ermB* were the most  
1529 dominant resistance genes detected, followed by *tetM*, *dfpG*, *vanB*, *vanC1* etc. 2aii) Shows the antibiotics to which the isolates were most resistant: erythromycin  
1530 (ERY) was the least effective drug, followed by rifampicin (RIF), tetracycline (TET), penicillin (PEN), sulphamethoxazole/trimethoprim (SXT), ciprofloxacin  
1531 (CIP), gentamicin (GEN), vancomycin (VAN), ampicillin (AMP), clindamycin (CLI), streptomycin (STR), chloramphenicol (CHL), and kanamycin (KAN). 2b)  
1532 Shows the MGEs per resistant Gram-positive bacterial clones in Africa. The figure represents resistant clones and the different MGEs they carry. Each colour  
1533 represent a particular resistant clone. *S. agalactiae* (ST612, ST616, ST617) and *S. pyogenes* (emm18, emm42, emm76, emm118), *E. faecium* (ST18, ST80,  
1534 ST910) and *S. aureus* (ST5, ST22, ST35) were associated with *Tn916*, *IS16* and *SCCmec* respectively.

1535 **Figure 3.** Frequency of resistant Gram-positive bacterial species clones and mobile genetic elements (MGEs) per country in Africa. 3a) Shows the distribution  
1536 frequencies of the resistant species, clones and MGEs per country in Africa whilst 3b) shows the total frequency per clone in Africa. It is obvious that *S. aureus*  
1537 ST5 is predominant in Tunisia, the DRC and Senegal whilst ST22 is highly prevalent in Algeria. *SCCmec* was the commonest MGE in most of the countries except  
1538 in Tunisia where *IS16* and *Tn916* were higher in prevalence. *S. aureus* ST8 and ST80 were the most common clones reported, followed by *E. faecium* ST317.

1539

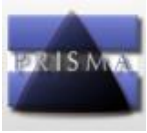

## PRISMA 2009 Flow Diagram

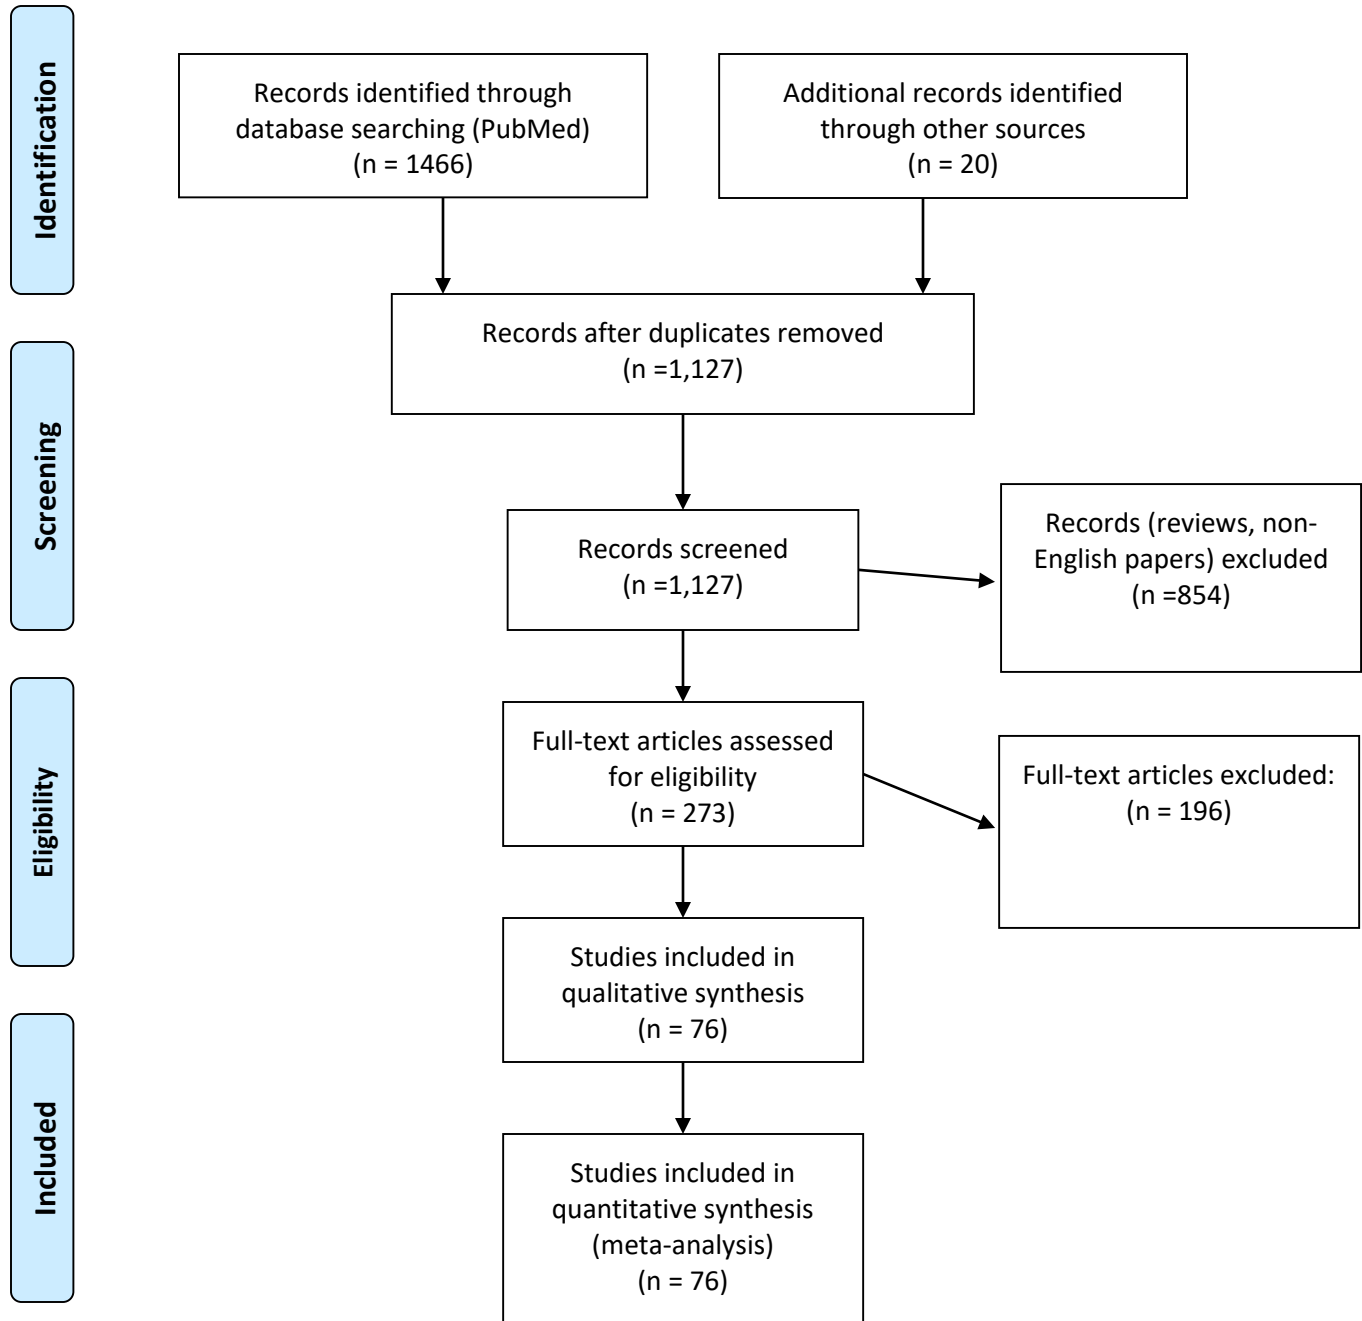

From: Moher D, Liberati A, Tetzlaff J, Altman DG, The PRISMA Group (2009). Preferred Reporting Items for Systematic Reviews and Meta-Analyses: The PRISMA Statement. PLoS Med 6(7): e1000097. doi:10.1371/journal.pmed1000097

For more information, visit [www.prisma-statement.org](http://www.prisma-statement.org).

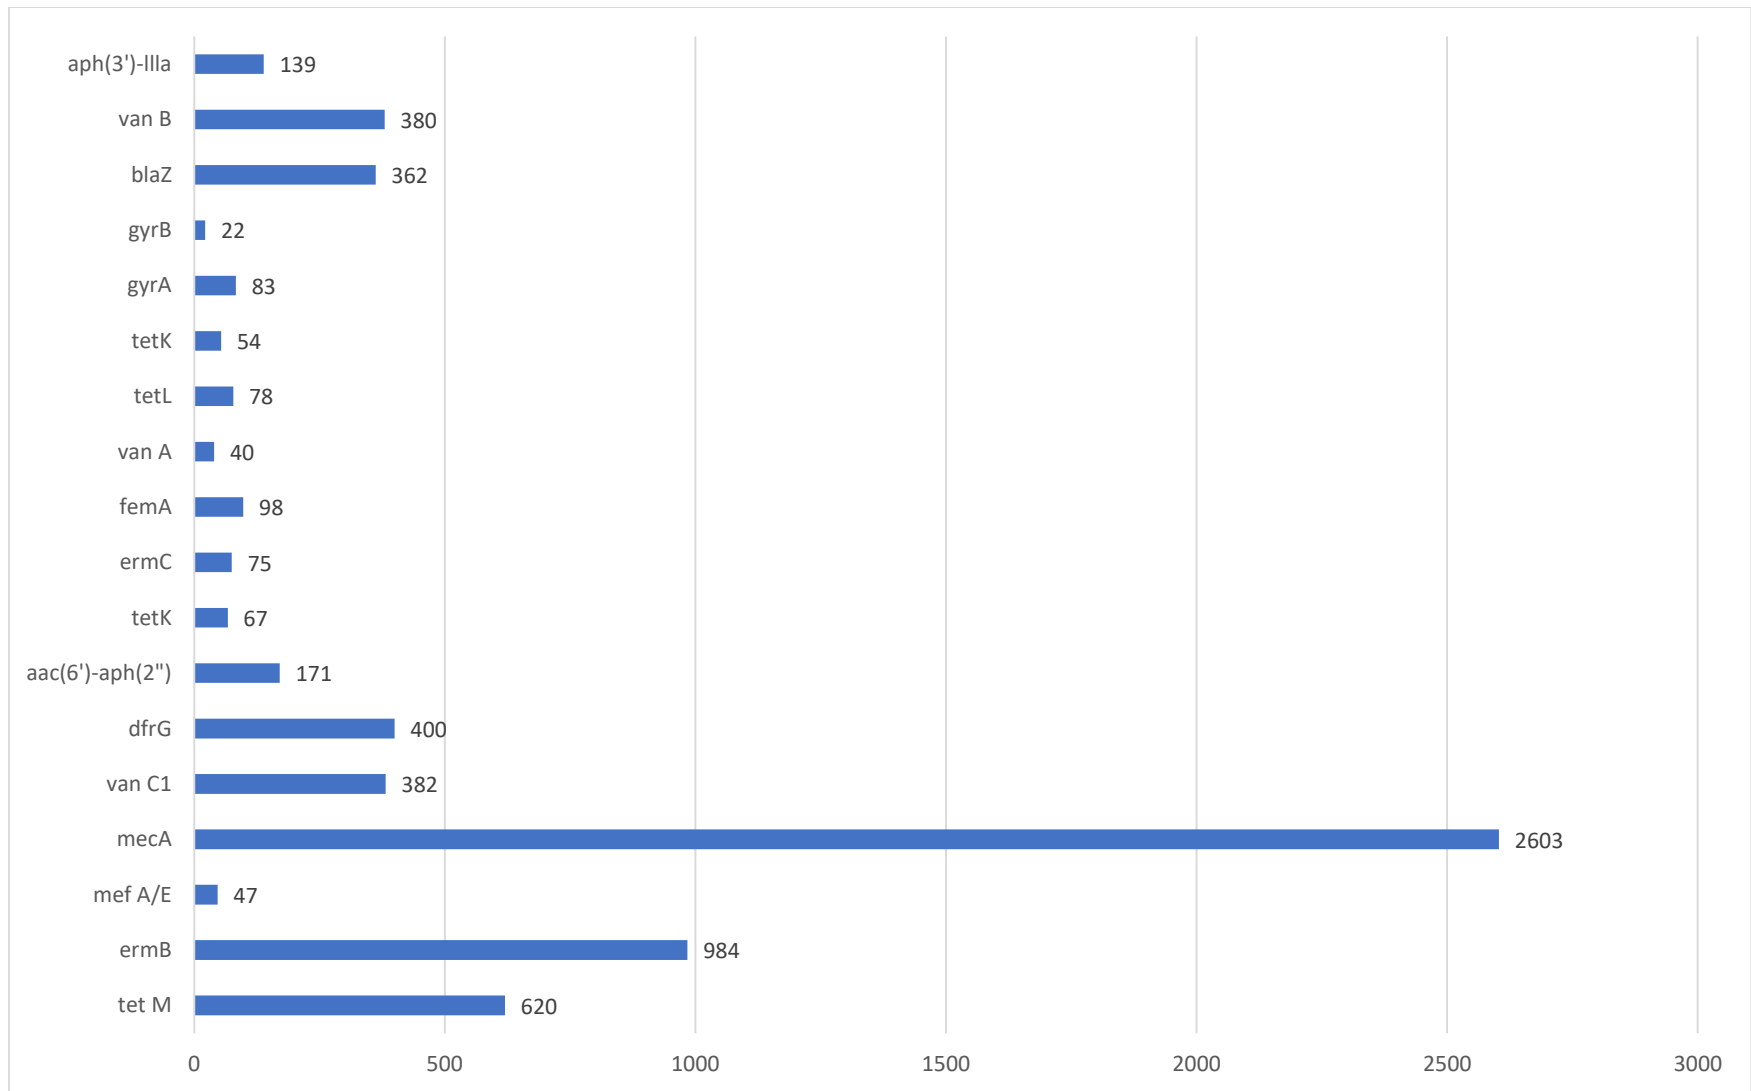

**Figure 2ai. Frequency and distribution of mobile genetic elements (MGEs), resistance genes and antibiotics with recorded resistance in Gram-positive bacteria in Africa.**

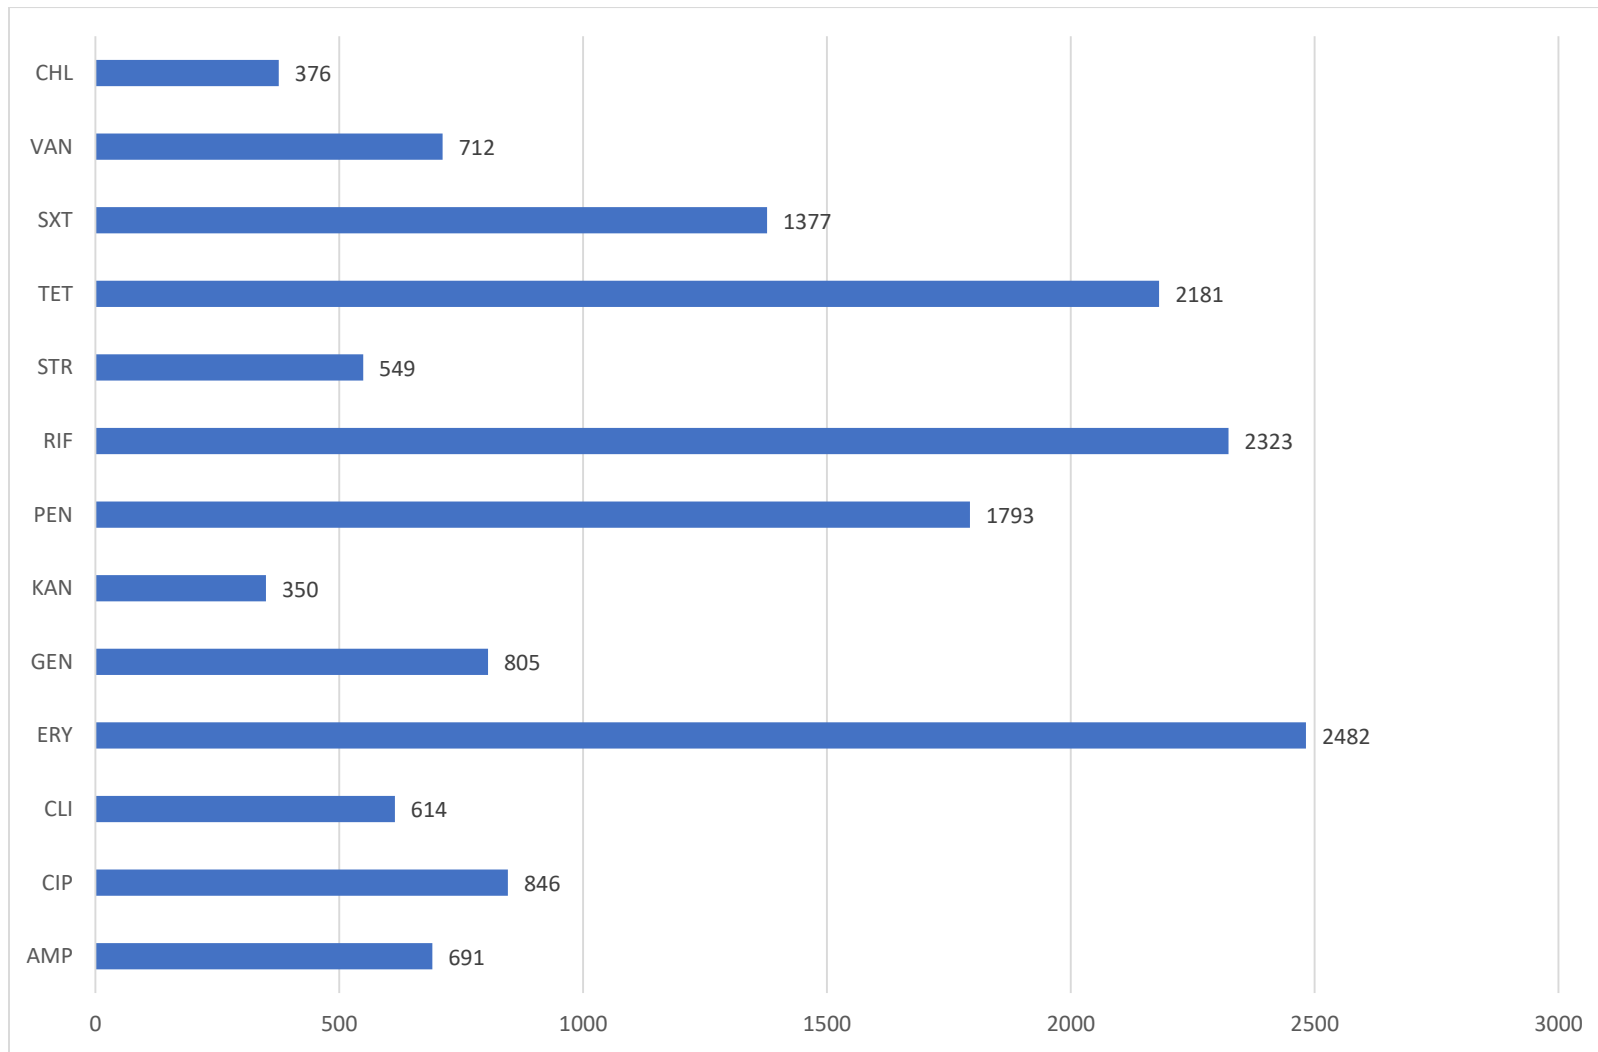

**Figure 2a.ii. Frequency and distribution of mobile genetic elements (MGEs), resistance genes and antibiotics with recorded resistance in Gram-positive bacteria in Africa.**

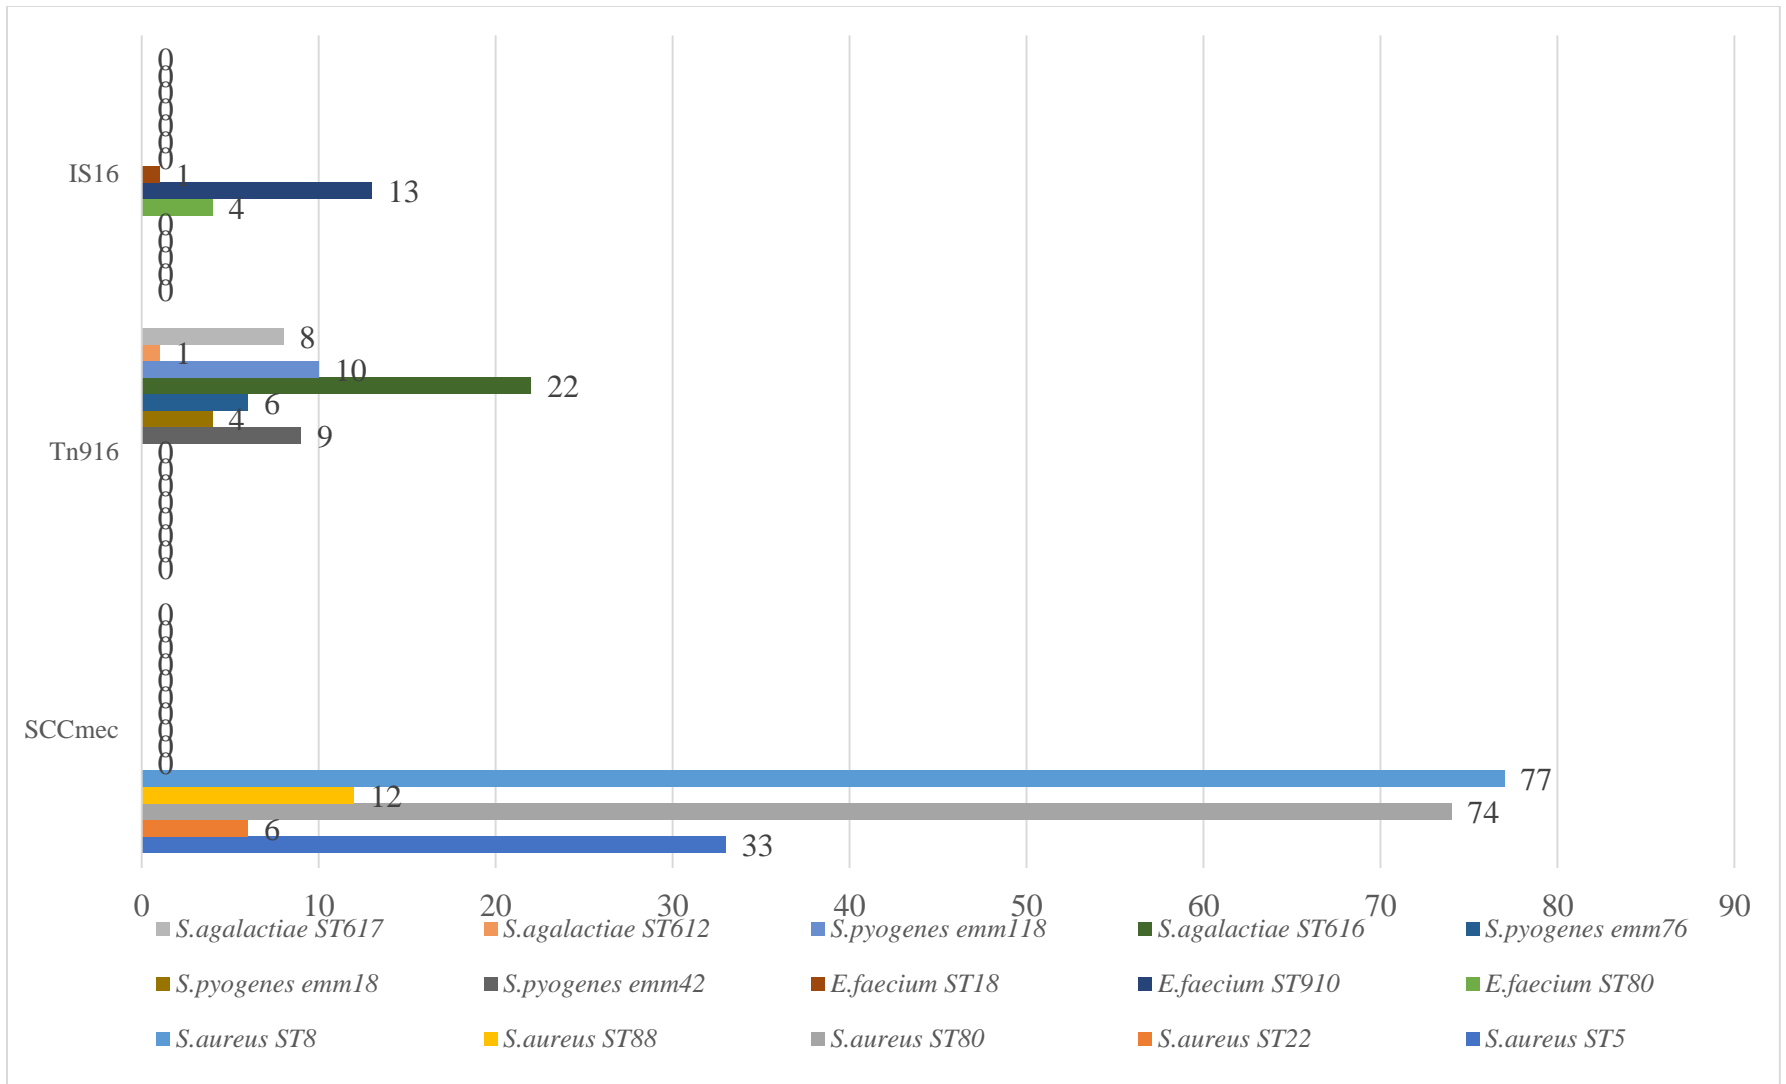

**Figure 2b. Frequency and distribution of mobile genetic elements (MGEs), resistance genes and antibiotics with recorded resistance in Gram-positive bacteria in Africa.**

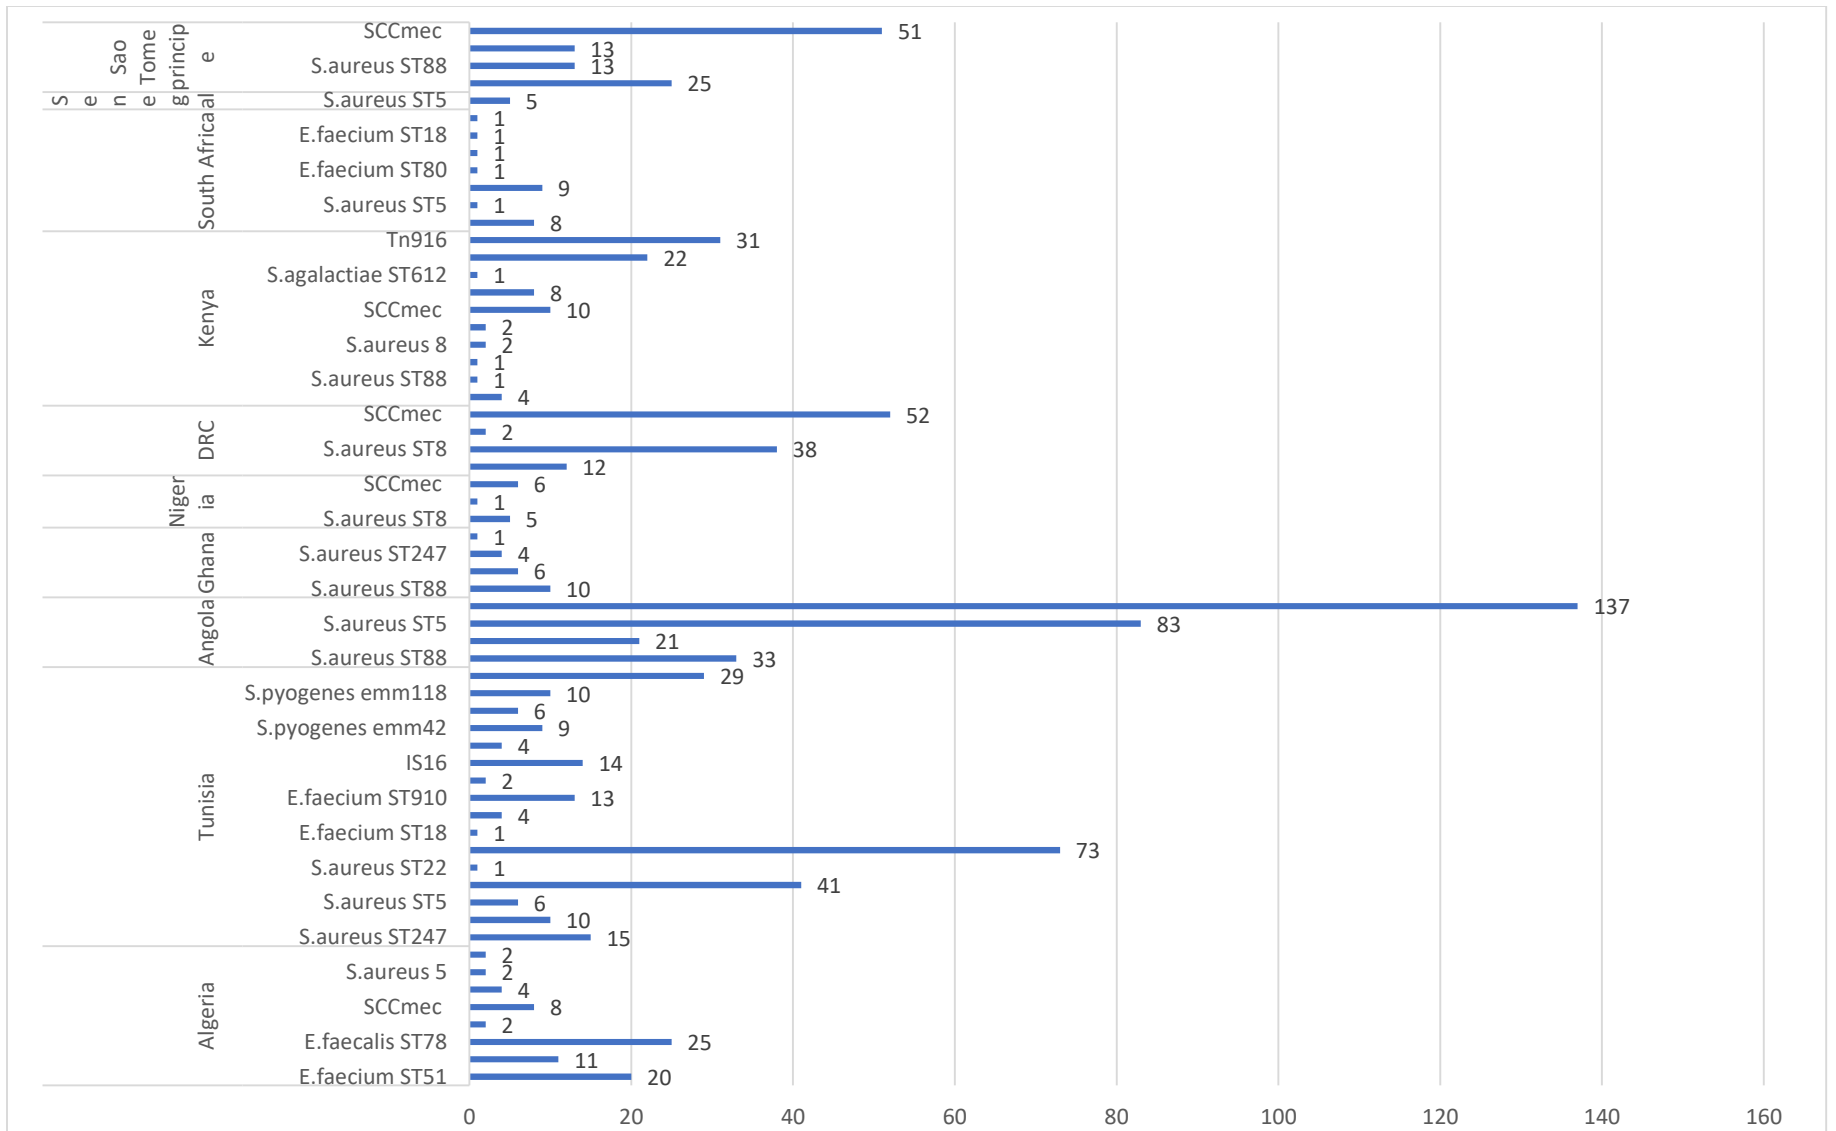

**Figure 3a. Frequency of resistant Gram-positive bacterial species clones and mobile genetic elements (MGEs) per country in Africa**

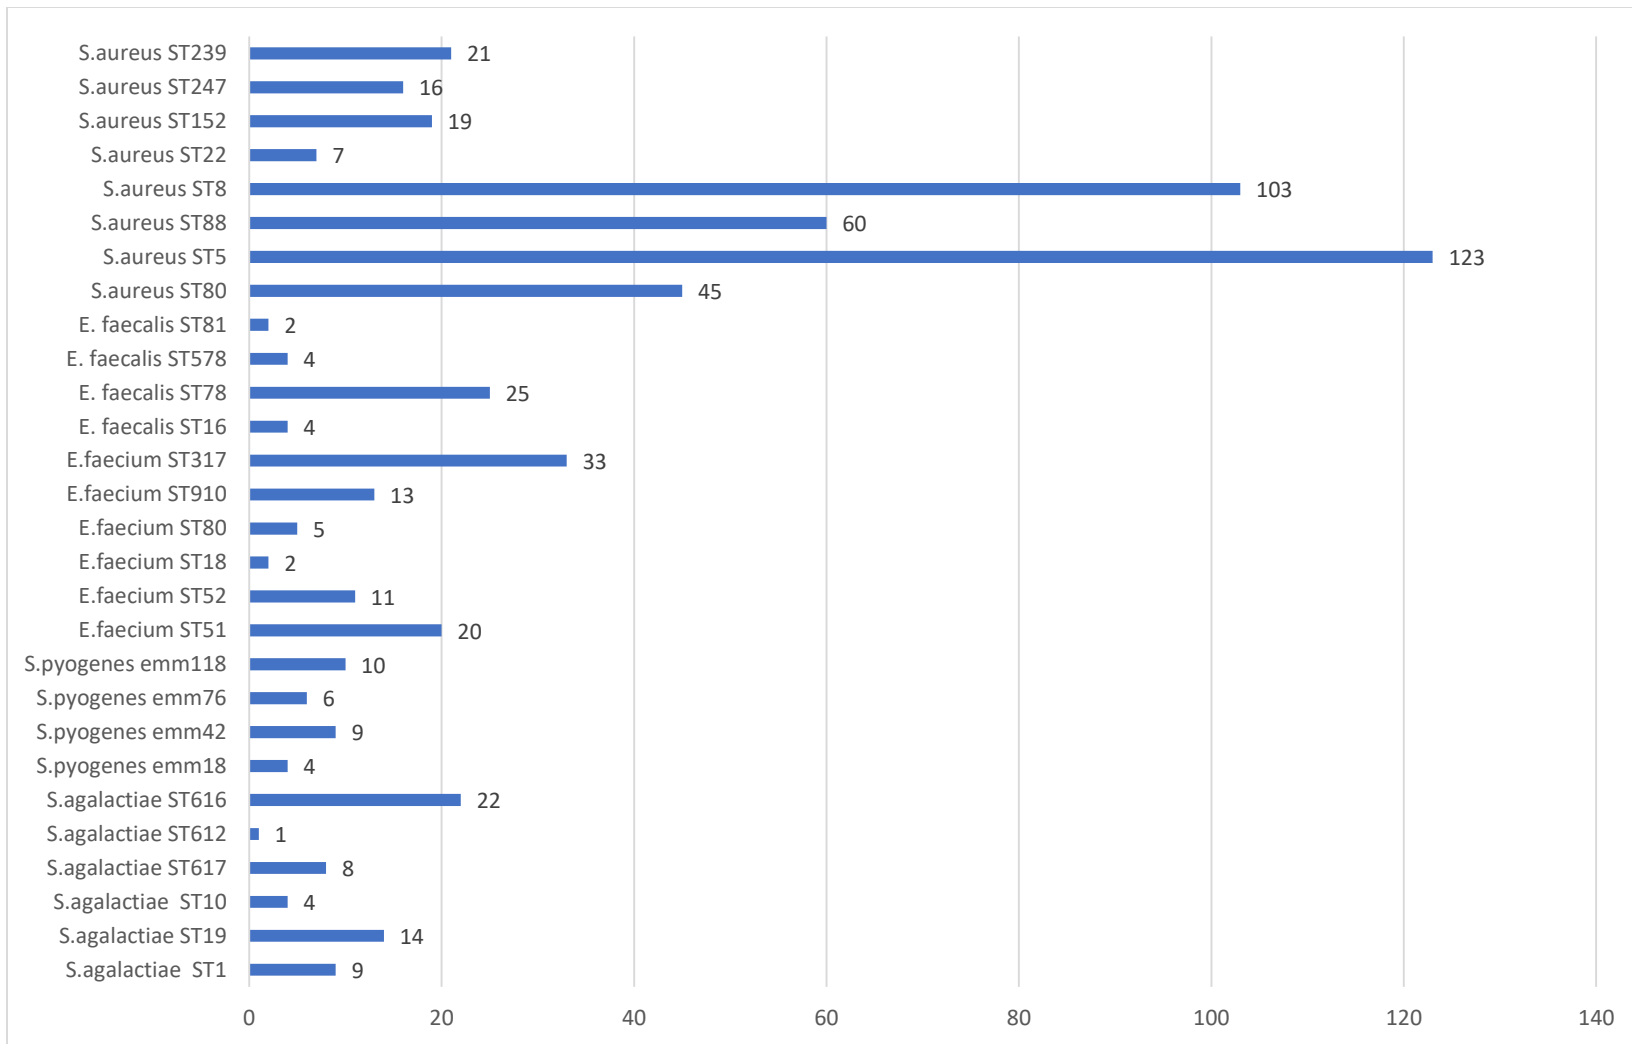

**Figure 3b. Frequency of resistant Gram-positive bacterial species clones and mobile genetic elements (MGEs) per country in Africa**
